# Supplementary material for: Easy synthesis of imidazo[1,5-a]indol-3-ones through Rh(iii)-catalyzed C–H allenylation/annulation
Source: Royal Society of Chemistry journal article supplement (doi:10.1039/d1cc04359e), 2021-01-01

# Easy Synthesis of Imidazo[1,5-*a*]indol-3-ones through Rh(III)-Catalyzed C–H Allenylation/Annulation

Bin Zhu, Zhenyu Yao, Lang Huang, and Xiuling Cui\*

*Engineering Research Centre of Molecular Medicine of Ministry of Education, Key Laboratory of Fujian Molecular Medicine, Key Laboratory of Precision Medicine and Molecular Diagnosis of Fujian Universities, Key Laboratory of Xiamen Marine and Gene Drugs, School of Biomedical Sciences, Huaqiao University, Xiamen 361021, P. R. China*

Corresponding Author: Xiuling Cui

Email: cuixl@hqu.edu.cn

Tel & Fax: +86-592-6162996

|                                                                                        |     |
|----------------------------------------------------------------------------------------|-----|
| 1. General information.....                                                            | S1  |
| 2. Optimization of the Reaction Conditions.....                                        | S1  |
| 3. General procedure for the synthesis of <b>3</b> .....                               | S2  |
| 4. The scale-up reaction procedure.....                                                | S2  |
| 5. General procedure for the synthesis of compounds <b>5</b> and <b>6</b> .....        | S2  |
| 6. Mechanism Experiments.....                                                          | S3  |
| 7. References.....                                                                     | S6  |
| 8. X-ray Crystallographic data of <b>3ka</b> .....                                     | S7  |
| 9. Characterization of compounds <b>3</b> and <b>4</b> .....                           | S13 |
| 10. Copies of the <sup>1</sup> H, <sup>13</sup> C and <sup>19</sup> F NMR Spectra..... | S27 |

## 1. General information

Unless otherwise stated, all commercial materials and solvents were used directly without further purification.  $^1\text{H}$  and  $^{13}\text{C}$  NMR spectra were measured on a 400 MHz Bruker spectrometer ( $^1\text{H}$  400MHz,  $^{13}\text{C}$  100MHz,  $^{19}\text{F}$  NMR 376 MHz), using  $\text{CDCl}_3$  (spectra were referenced to the solvent peaks  $^1\text{H}$ : residual  $\text{CDCl}_3 = 7.26$  ppm,  $^{13}\text{C}$ :  $\text{CDCl}_3 = 77.0$  ppm) or  $\text{DMSO}-d_6$  (spectra were referenced to the solvent peaks  $^1\text{H}$ : residual  $\text{DMSO}-d_6 = 2.50$  ppm,  $^{13}\text{C}$ :  $\text{DMSO}-d_6 = 39.5$  ppm) as the solvent. High-resolution mass spectra (HRMS) were measured on ESI-TOF. Column chromatography was performed on silica gel (70-230 mesh ASTM) using the reported eluent. Thin-layer chromatography (TLC) was carried out on 4×5 cm plates with a layer thickness of 0.2 mm (silica gel 60 F254). Starting materials *N*-methoxycarbonyl indoles **1**<sup>1</sup> and propargylic alcohols **2**<sup>2</sup> were prepared according to the literatures.

## 2. Optimization of the Reaction Conditions

Table S1 Optimization of the Reaction Conditions <sup>a</sup>

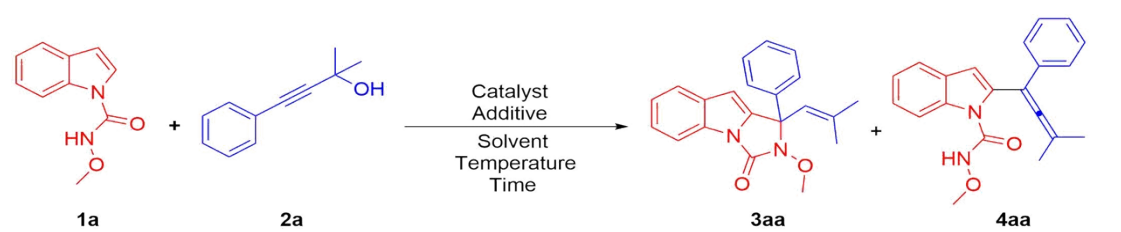

| Entry              | Additive             | Solvent            | T (°C) | Yield <sup>b</sup> |         |
|--------------------|----------------------|--------------------|--------|--------------------|---------|
|                    |                      |                    |        | 3aa (%)            | 4aa (%) |
| 1                  | NaOAc                | DCM                | 100    | 47                 |         |
| 2                  | KOAc                 | DCM                | 100    | 22                 |         |
| 3                  | Mn(OAc) <sub>2</sub> | DCM                | 100    | 12                 |         |
| 4                  | LiOAc                | DCM                | 100    | N.D.               | N.D.    |
| 5                  | Zn(OAc) <sub>2</sub> | DCM                | 100    | 55                 | 9       |
| 6 <sup>c</sup>     | Zn(OAc) <sub>2</sub> | DCM                | 100    | 38                 | 30      |
| 7 <sup>d</sup>     | Zn(OAc) <sub>2</sub> | DCM                | 100    | 30                 | 34      |
| 8 <sup>e</sup>     | Zn(OAc) <sub>2</sub> | DCM                | 100    | 45                 | 32      |
| 9                  | Zn(OAc) <sub>2</sub> | DCE                | 100    | 47                 |         |
| 10                 | Zn(OAc) <sub>2</sub> | Acetone            | 100    | 28                 |         |
| 11                 | Zn(OAc) <sub>2</sub> | CH <sub>3</sub> OH | 100    | N.D.               | N.D.    |
| 12                 | Zn(OAc) <sub>2</sub> | MeCN               | 100    | 27                 |         |
| 13                 | Zn(OAc) <sub>2</sub> | Toluene            | 100    | 25                 |         |
| 14 <sup>f</sup>    | Zn(OAc) <sub>2</sub> | DCM                | 100    | 59                 | 24      |
| 15 <sup>g</sup>    | Zn(OAc) <sub>2</sub> | DCM                | 100    | 71                 | trace   |
| 16 <sup>h</sup>    | Zn(OAc) <sub>2</sub> | DCM                | 100    | 71                 | trace   |
| 17 <sup>g</sup>    | Zn(OAc) <sub>2</sub> | DCM                | 120    | 72                 | trace   |
| 18 <sup>g</sup>    | Zn(OAc) <sub>2</sub> | DCM                | 80     | 53                 | 21      |
| 19 <sup>g</sup>    | Zn(OAc) <sub>2</sub> | DCM                | 60     | 34                 | 46      |
| 20 <sup>g, i</sup> |                      | DCM                | 100    | 60                 | 24      |
| 21 <sup>j</sup>    | Zn(OAc) <sub>2</sub> | DCM                | 100    | N.D.               | N.D.    |

|                 |                      |     |     |      |      |
|-----------------|----------------------|-----|-----|------|------|
| 22 <sup>k</sup> | Zn(OAc) <sub>2</sub> | DCM | 100 | N.D. | N.D. |
| 23 <sup>l</sup> | Zn(OAc) <sub>2</sub> | DCM | 100 | N.D. | N.D. |

<sup>a</sup> Reaction conditions: **1a** (0.2 mmol), **2a** (0.2 mmol), [Cp\*RhCl<sub>2</sub>]<sub>2</sub> (2.5 mol%), additives (0.2 mmol, 1 equiv), solvent (2.0 mL), 100 °C, 12 h, sealed tube. <sup>b</sup> Isolated yields. <sup>c</sup> Zn(OAc)<sub>2</sub> (0.5 equiv). <sup>d</sup> Zn(OAc)<sub>2</sub> (0.2 equiv). <sup>e</sup> Zn(OAc)<sub>2</sub> (2 equiv). <sup>f</sup> 24 h. <sup>g</sup> 36 h. <sup>h</sup> 48 h. <sup>i</sup> Cp\*Rh(OAc)<sub>2</sub> (5 mol%). <sup>j</sup> [Cp\*IrCl<sub>2</sub>]<sub>2</sub> (2.5 mol%). <sup>k</sup> [Ru(p-cymene)Cl<sub>2</sub>]<sub>2</sub> (5 mol%). <sup>l</sup> without [Cp\*RhCl<sub>2</sub>]<sub>2</sub>. N.D. = not detected.

### 3. General procedure for the synthesis of **3**

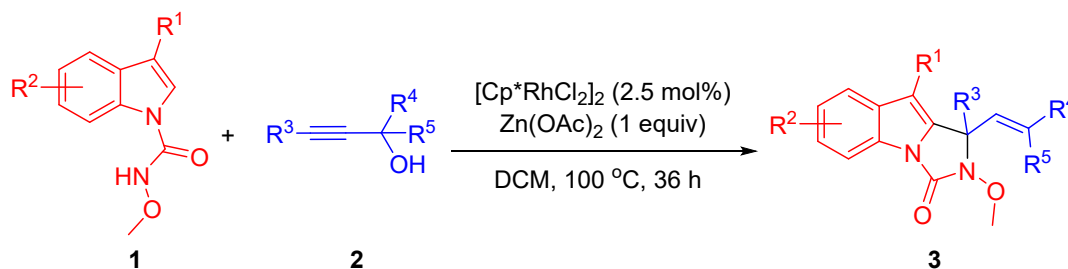

To a tube equipped with magnetic stir bar, *N*-methoxycarbamoyl indoles (**1**, 0.2 mmol), propargyl alcohols (**2**, 0.2 mmol), [Cp\*RhCl<sub>2</sub>]<sub>2</sub> (0.005 mmol, 2.5 mmol%), and Zn(OAc)<sub>2</sub> (0.2 mmol, 1 equiv) were added in DCM (2.0 mL). The mixture was sealed and stirred at 100 °C in a heating mantle for 36 h. After the mixture was cooled to room temperature, the solvent was removed under reduced pressure, purification was performed by flash column chromatography on silica gel with petroleum ether/ethyl acetate (gradient mixture ratio from 40:1 to 30:1) as eluent to give the corresponding compounds **3**.

### 4. The scale-up reaction procedure

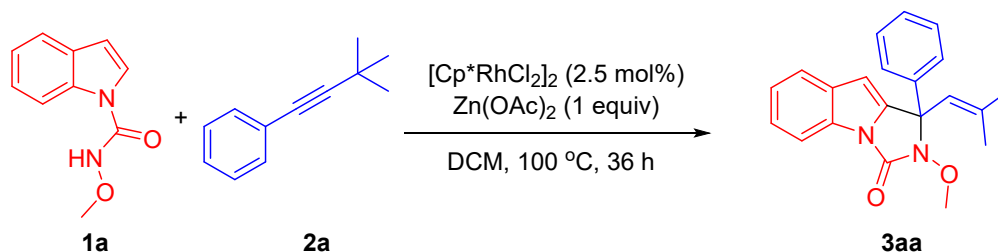

To a round bottle charged with magnetic stir bar, *N*-methoxycarbamoyl indoles (**1a**, 5.5 mmol), propargyl alcohols (**2a**, 5.5 mmol), [Cp\*RhCl<sub>2</sub>]<sub>2</sub> (0.005 mmol, 2.5 mmol%), and Zn(OAc)<sub>2</sub> (0.2 mmol, 1 equiv) were added in DCM (55.0 mL). The system was refluxed at 100 °C for 36 h. After the mixture was cooled to room temperature, the solvent was removed under reduced pressure, purification was performed by flash column chromatography on silica gel with petroleum ether/ethyl acetate (gradient mixture ratio from 40:1 to 30:1) as eluent to give the corresponding compounds **3aa** (60%, 1.09 g).

### 5. General procedure for the synthesis of compounds **5** and **6**

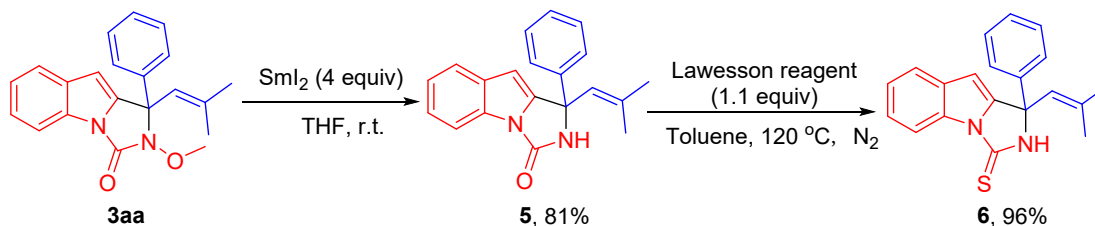

In a flame-dried round-bottom flask, 3aa (67.0 mg, 0.2 mmol, 1.0 equiv) was dissolved in dry THF (5.0 mL). SmI2-solution (0.1 M in THF, 8.0 mL, 4.0 equiv) was added dropwise at room temperature. The reaction was stirred at room temperature for 5 h under the protection of nitrogen. The solvent was removed under reduced pressure and the compound 5 was obtained as white solid (49.0 mg, 81% yield) after purification by flash column chromatography on silica gel with petroleum ether/ethyl acetate (gradient mixture ratio from 30:1 to 5:1).

A mixture of 5 (30.2 mg, 0.1 mmol, 1.0 equiv), Lawesson reagent (44.5 mg, 0.11 mmol, 1.1 equiv) dissolved in 2.0 mL toluene in sealed tube was stirred vigorously at 120 °C in a heating mantle for 12 h under a N<sub>2</sub> atmosphere. The solvent was removed under reduced pressure and compound 6 was obtained as white solid (30.6 mg, 96% yield) after purification by flash column chromatography on silica gel with petroleum ether/ethyl acetate (gradient mixture ratio from 20:1 to 10:1).

## 6. Mechanism Exploration

**Deuterium-Labeling Experiment:** To a tube equipped with magnetic stir bar, *N*-methoxy-1*H*-indole-1-carboxamide **1a** (38.0 mg, 0.2 mmol), [Cp\**Rh*Cl<sub>2</sub>]<sub>2</sub> (3.1 mg, 0.005 mmol), Zn(OAc)<sub>2</sub> (36.7 mg, 0.2 mmol), methanol-*d*<sub>4</sub> (10 equiv) were added in DCM (2.0 mL). The mixture was sealed and stirred at 100 °C in a heating mantle for 36 h. After the mixture was cooled to room temperature, the solvent was removed under reduced pressure, purification was performed by flash column chromatography on silica gel to give the corresponding product [**D**]-**1a**. Approximately 17% deuteration at the C2 position of **1a**, 54% deuteration at the C3 position and 60% deuteration at the C7 position.

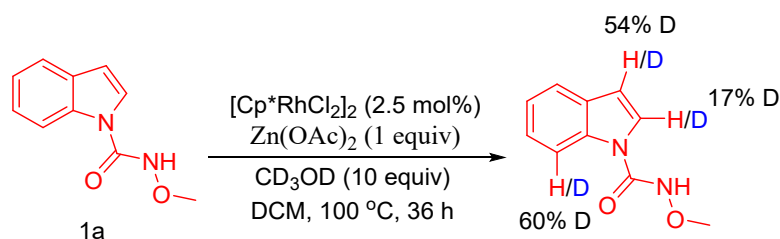

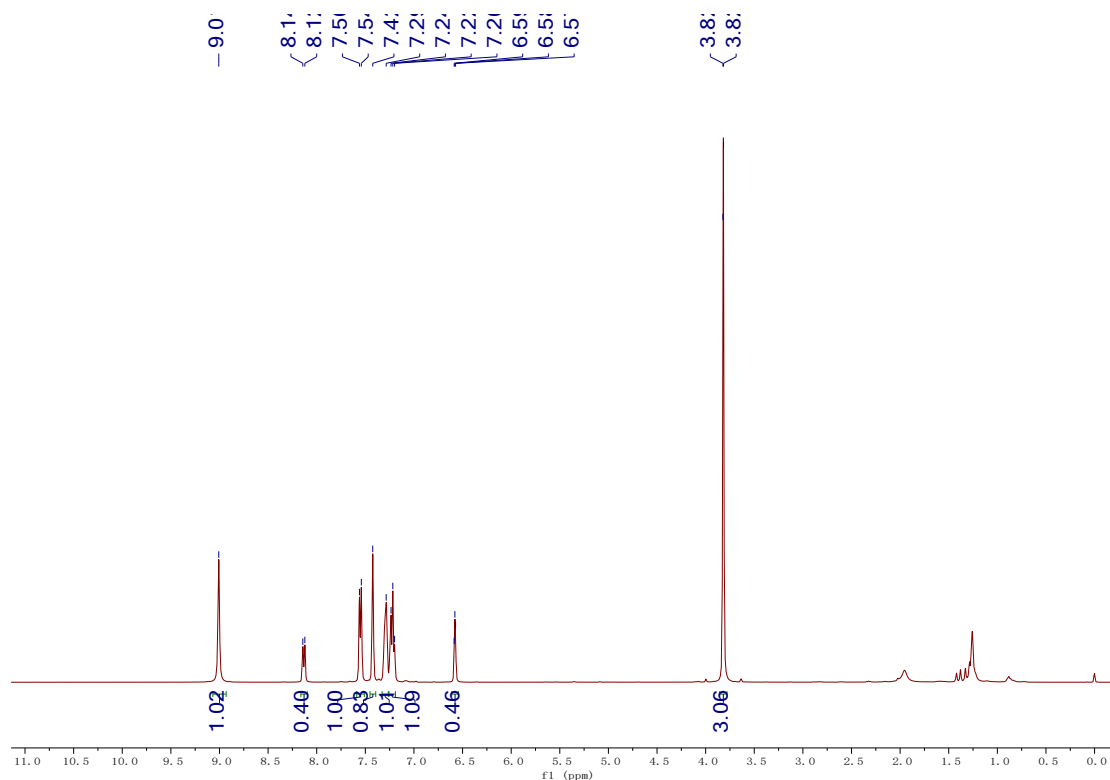

To a tube equipped with magnetic stir bar, *N*-methoxy-1*H*-indole-1-carboxamide **1a** (38.0 mg, 0.2 mmol), [Cp\**Rh*Cl<sub>2</sub>]<sub>2</sub> (3.1 mg, 0.005 mmol), methanol-*d*<sub>4</sub> (10 equiv) were added in DCM (2.0 mL). The mixture was sealed and stirred at 100 °C in a heating mantle for 36 h. After the mixture was cooled to room temperature, the solvent was removed under reduced pressure, purification was performed by flash column chromatography on silica gel to give the corresponding product [**D**]-**1a**. No deuteration of **1a** was observed without the Zn(OAc)<sub>2</sub>.

**Kinetic Isotope Effect (KIE) Study:** 2-Deuterium indole was prepared according to literature,<sup>3</sup> and [**D**]-**1a** was synthesized according to the following procedure.

To a tube equipped with magnetic stir bar, **1a** (0.2 mmol), **2a** (0.2 mmol), [Cp\**Rh*Cl<sub>2</sub>]<sub>2</sub> (0.005 mmol, 2.5 mmol%), and Zn(OAc)<sub>2</sub> (0.2 mmol, 1 equiv) were added in DCM (2.0 mL). The mixture was sealed and stirred at 100 °C in a heating mantle for 1 h. After the mixture was cooled to room temperature, the solvent was removed under reduced pressure and the compound **4aa** was obtained as colorless oil (33.9 mg, 51% yield) after purification by flash column chromatography on silica gel with petroleum ether/ethyl acetate (gradient mixture ratio from 30:1 to 5:1).

To a tube equipped with magnetic stir bar, [**D**]-**1a** (0.2 mmol), propargyl alcohol (0.2 mmol), [Cp\**Rh*Cl<sub>2</sub>]<sub>2</sub> (0.005 mmol, 2.5 mmol%), and Zn(OAc)<sub>2</sub> (0.2 mmol, 1 equiv) were added in DCM (2.0 mL). The mixture was sealed and stirred at 100°C in a heating mantle for 1 h. After the mixture was cooled to room temperature, the solvent was removed under reduced pressure and the compound **4aa** was obtained as colorless oil (35.2 mg, 53% yield) after purification by flash column chromatography on silica gel with petroleum ether/ethyl acetate (gradient mixture ratio from 30:1 to 5:1). An kinetic isotopic effect of this reaction was thus determined to be  $k_H/k_D = 0.96$ .

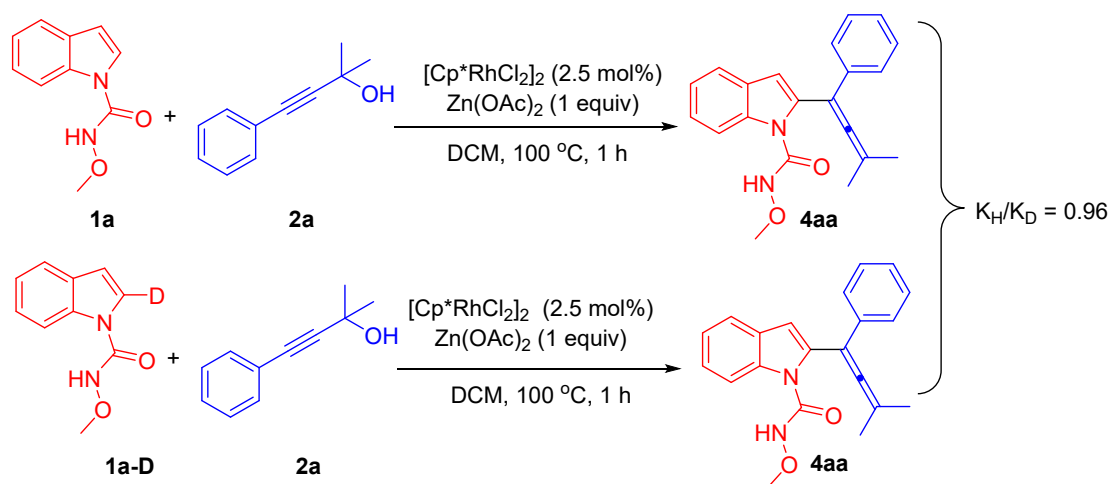

#### Reaction of the Intermediate

To a tube equipped with magnetic stir bar, **4aa** (0.2 mmol),  $[\text{Cp}^*\text{RhCl}_2]_2$  (0.005 mmol, 2.5 mmol%), and  $\text{Zn}(\text{OAc})_2$  (0.2 mmol, 1 equiv) were added in DCM (2.0 mL). The mixture was sealed and stirred at 100 °C in a heating mantle for 19 h. After the mixture was cooled to room temperature, the solvent was removed under reduced pressure and the compound **3aa** was obtained as colorless oil (43.2 mg, 65% yield) after purification by flash column chromatography on silica gel with petroleum ether/ethyl acetate (gradient mixture ratio from 40:1 to 30:1).

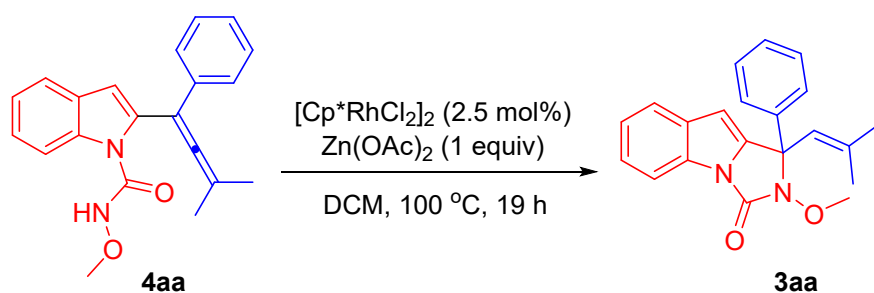

To a tube equipped with magnetic stir bar, **1a** (0.2 mmol), **2a** (0.2 mmol),  $[\text{Cp}^*\text{RhCl}_2]_2$  (0.005 mmol, 2.5 mmol%), and  $\text{Zn}(\text{OAc})_2$  (0.2 mmol, 1 equiv) were added in DCM (2.0 mL). The mixture was sealed and stirred at 100 °C in a heating mantle for 0.5 h. Then, the reaction was cooled to room temperature. The reaction mixture was detected by HRMS-ESI.

|             |             |                        |                                   |                 |             |
|-------------|-------------|------------------------|-----------------------------------|-----------------|-------------|
| Sample Name | Unavailable | Position               | Unavailable                       | Instrument Name | Unavailable |
| User Name   | Unavailable | Inj Vol                | Unavailable                       | InjPosition     | Unavailable |
| Sample Type | Unavailable | IRM Calibration Status | Success                           | Data Filename   | zb-1.d      |
| ACQ Method  |             | Comment                | Sample information is unavailable | Acquired Time   | Unavailable |

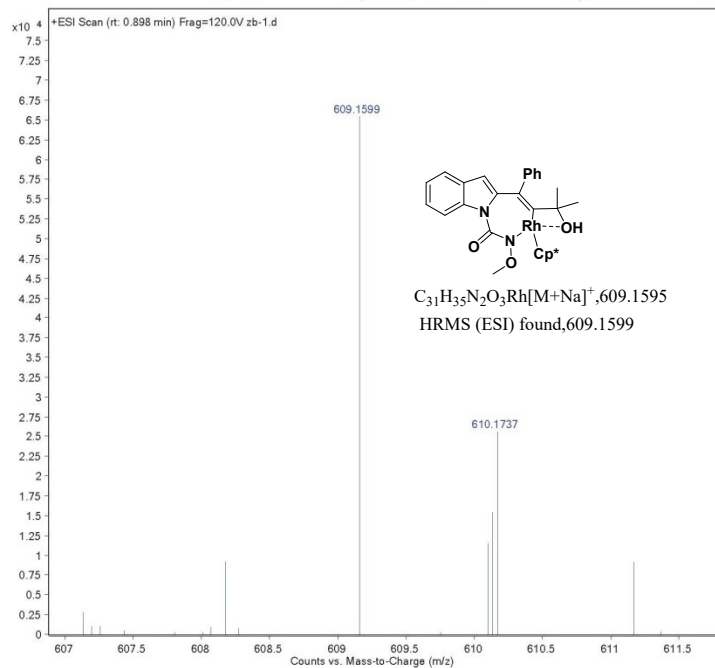

## 7. References

- (1) W. J. Kong, X. Chen, M. Wang, H. X. Dai, J. Q. Yu, *Org. Lett.* 2018, **20**, 284-287.
- (2) Z. Jiao, Q. Shi, Steve Zhou, *J. Angew. Chem., Int. Ed.* 2017, **56**, 14567-14571.
- (3) C. S. Sevov, J. F. J. Hartwig, *Am. Chem. Soc.* 2013, **135**, 2116-2119.

## 8.X-ray data of compound 3ka:

Single crystal suitable for X-ray diffraction experiment were obtained by slow evaporation of DCM/*n*-hexane (1:10, V/V) solution containing the compound **3aa**.

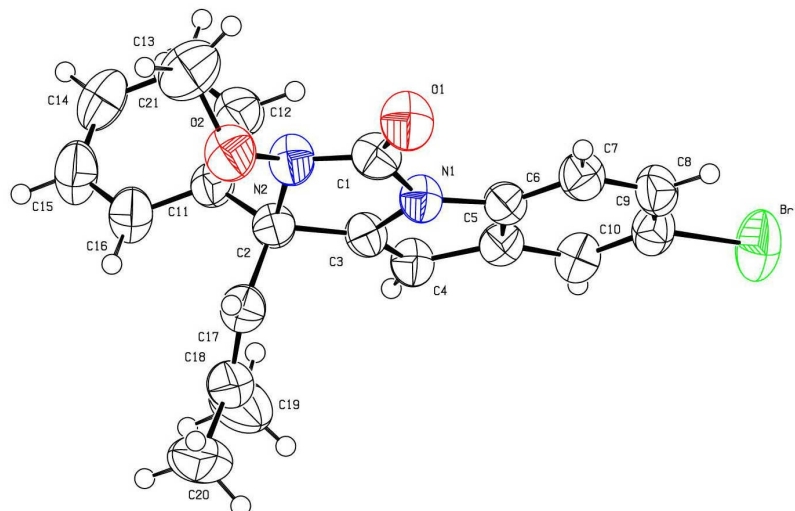

**Figure S1.** X-ray molecular structure of **3aa** with the probability at 50% level.

Table S2 Crystal data and structure refinement for **3ka**.

|                                        |                                                                              |
|----------------------------------------|------------------------------------------------------------------------------|
| Identification code                    | 3ka                                                                          |
| Empirical formula                      | C <sub>21</sub> H <sub>19</sub> BrN <sub>2</sub> O <sub>2</sub>              |
| Formula weight                         | 411.29                                                                       |
| Temperature/K                          | 293(2)                                                                       |
| Crystal system                         | triclinic                                                                    |
| Space group                            | P-1                                                                          |
| <i>a</i> /Å                            | 7.6120(5)                                                                    |
| <i>b</i> /Å                            | 10.8082(10)                                                                  |
| <i>c</i> /Å                            | 12.5550(7)                                                                   |
| $\alpha$ /°                            | 85.011(6)                                                                    |
| $\beta$ /°                             | 73.475(6)                                                                    |
| $\gamma$ /°                            | 79.776(7)                                                                    |
| Volume/Å <sup>3</sup>                  | 973.80(13)                                                                   |
| <i>Z</i>                               | 2                                                                            |
| $\rho_{\text{calc}}$ /cm <sup>3</sup>  | 1.403                                                                        |
| $\mu$ /mm <sup>-1</sup>                | 3.010                                                                        |
| <i>F</i> (000)                         | 420.0                                                                        |
| Crystal size/mm <sup>3</sup>           | 0.16 × 0.14 × 0.1                                                            |
| Radiation                              | CuK $\alpha$ ( $\lambda$ = 1.54184)                                          |
| 2 $\theta$ range for data collection/° | 7.35 to 134.158                                                              |
| Index ranges                           | -9 ≤ <i>h</i> ≤ 7, -12 ≤ <i>k</i> ≤ 12, -14 ≤ <i>l</i> ≤ 9                   |
| Reflections collected                  | 6968                                                                         |
| Independent reflections                | 3451 [ <i>R</i> <sub>int</sub> = 0.0277, <i>R</i> <sub>sigma</sub> = 0.0402] |



|                                             |                                                   |
|---------------------------------------------|---------------------------------------------------|
| Data/restraints/parameters                  | 3451/0/238                                        |
| Goodness-of-fit on F <sup>2</sup>           | 1.050                                             |
| Final R indexes [ $I \geq 2\sigma(I)$ ]     | R <sub>1</sub> = 0.0453, wR <sub>2</sub> = 0.1018 |
| Final R indexes [all data]                  | R <sub>1</sub> = 0.0661, wR <sub>2</sub> = 0.1155 |
| Largest diff. peak/hole / e Å <sup>-3</sup> | 0.65/-0.56                                        |

Table S3 Fractional Atomic Coordinates ( $\times 10^4$ ) and Equivalent Isotropic Displacement Parameters

(Å<sup>2</sup> $\times 10^3$ ) for 3ka. U<sub>eq</sub> is defined as 1/3 of of the trace of the orthogonalised U<sub>ij</sub> tensor.

| Atom | x         | y         | z         | U(eq)     |
|------|-----------|-----------|-----------|-----------|
| Br1  | 5421.7(7) | 7966.6(5) | 4593.1(4) | 87.4(2)   |
| C1   | 11224(4)  | 4135(3)   | 7624(3)   | 53.3(8)   |
| C2   | 9310(4)   | 2513(3)   | 8298(3)   | 47.4(8)   |
| C3   | 8485(4)   | 3511(3)   | 7562(3)   | 45.7(7)   |
| C4   | 6965(4)   | 3885(3)   | 7206(3)   | 49.2(8)   |
| C5   | 7269(4)   | 5012(3)   | 6520(3)   | 47.3(7)   |
| C6   | 9007(4)   | 5291(3)   | 6503(3)   | 46.9(7)   |
| C7   | 9726(5)   | 6328(3)   | 5921(3)   | 55.9(9)   |
| C8   | 8625(5)   | 7103(3)   | 5348(3)   | 60.4(9)   |
| C9   | 6908(5)   | 6839(3)   | 5369(3)   | 56.8(9)   |
| C10  | 6193(5)   | 5809(3)   | 5932(3)   | 53.0(8)   |
| C11  | 7991(4)   | 2331(3)   | 9453(3)   | 49.0(8)   |
| C12  | 7032(6)   | 3379(4)   | 10035(3)  | 66.8(10)  |
| C13  | 5910(6)   | 3260(4)   | 11117(3)  | 77.6(12)  |
| C14  | 5727(6)   | 2093(5)   | 11600(3)  | 80.0(13)  |
| C15  | 6651(6)   | 1053(4)   | 11022(3)  | 80.0(13)  |
| C16  | 7790(5)   | 1166(4)   | 9951(3)   | 64.3(10)  |
| C17  | 10231(5)  | 1327(3)   | 7672(3)   | 53.8(8)   |
| C18  | 9479(6)   | 542(4)    | 7271(3)   | 64.0(10)  |
| C19  | 7450(7)   | 635(4)    | 7397(5)   | 96.6(16)  |
| C20  | 10685(7)  | -586(4)   | 6653(4)   | 98.8(16)  |
| C21  | 12257(7)  | 2794(5)   | 9826(4)   | 104.4(17) |
| N1   | 9747(3)   | 4346(3)   | 7145(2)   | 48.1(6)   |
| N2   | 10783(4)  | 3204(3)   | 8428(2)   | 54.9(7)   |
| O1   | 12518(3)  | 4692(3)   | 7409(2)   | 70.1(7)   |
| O2   | 12273(3)  | 2473(2)   | 8742(2)   | 69.5(7)   |

Table S4 Anisotropic Displacement Parameters (Å<sup>2</sup> $\times 10^3$ ) for 3ka. The Anisotropic displacement factor exponent takes the form:  $-2\pi^2[h^2a^*U_{11}+2hka^*b^*U_{12}+\dots]$ .

| Atom | U <sub>11</sub> | U <sub>22</sub> | U <sub>33</sub> | U <sub>23</sub> | U <sub>13</sub> | U <sub>12</sub> |
|------|-----------------|-----------------|-----------------|-----------------|-----------------|-----------------|
| Br1  | 78.6(3)         | 89.3(4)         | 79.4(3)         | 26.2(3)         | -19.8(2)        | 8.6(2)          |

|     |          |          |          |          |           |           |
|-----|----------|----------|----------|----------|-----------|-----------|
| C1  | 42.5(18) | 58(2)    | 64(2)    | -3.7(17) | -17.1(16) | -13.0(16) |
| C2  | 45.2(18) | 47.5(19) | 54.2(19) | 2.0(15)  | -20.1(15) | -11.0(14) |
| C3  | 42.0(17) | 45.1(18) | 49.5(18) | 1.6(14)  | -9.9(14)  | -11.9(14) |
| C4  | 40.7(17) | 53(2)    | 55.8(19) | 5.6(15)  | -14.3(15) | -13.7(15) |
| C5  | 42.4(17) | 52.0(19) | 44.6(17) | -3.7(15) | -8.2(14)  | -5.3(14)  |
| C6  | 47.4(18) | 44.7(18) | 47.6(18) | -2.1(14) | -11.1(14) | -7.8(14)  |
| C7  | 54(2)    | 58(2)    | 55(2)    | 2.7(17)  | -10.8(16) | -16.3(17) |
| C8  | 71(2)    | 51(2)    | 53(2)    | 7.0(16)  | -7.7(18)  | -12.8(18) |
| C9  | 55(2)    | 57(2)    | 50.2(19) | 3.0(16)  | -10.8(16) | 3.9(17)   |
| C10 | 43.0(18) | 62(2)    | 51.6(19) | 2.3(17)  | -11.7(15) | -5.9(16)  |
| C11 | 46.7(18) | 52(2)    | 52.2(19) | 1.3(16)  | -19.4(15) | -9.1(15)  |
| C12 | 78(3)    | 58(2)    | 63(2)    | -2.1(19) | -13(2)    | -18(2)    |
| C13 | 86(3)    | 84(3)    | 58(2)    | -20(2)   | -7(2)     | -14(2)    |
| C14 | 81(3)    | 105(4)   | 48(2)    | 14(2)    | -12(2)    | -19(3)    |
| C15 | 90(3)    | 73(3)    | 67(3)    | 22(2)    | -16(2)    | -8(2)     |
| C16 | 66(2)    | 61(2)    | 59(2)    | 9.6(18)  | -13.6(18) | -2.8(18)  |
| C17 | 50.6(19) | 55(2)    | 51.8(19) | -1.2(16) | -11.5(16) | -2.6(16)  |
| C18 | 79(3)    | 54(2)    | 64(2)    | -2.1(18) | -29(2)    | -6.4(19)  |
| C19 | 101(4)   | 74(3)    | 141(4)   | -7(3)    | -67(3)    | -25(3)    |
| C20 | 129(4)   | 74(3)    | 97(4)    | -33(3)   | -40(3)    | 3(3)      |
| C21 | 120(4)   | 119(4)   | 104(4)   | 3(3)     | -78(3)    | -22(3)    |
| N1  | 40.0(14) | 52.2(16) | 54.0(16) | 6.0(13)  | -13.7(12) | -14.5(12) |
| N2  | 44.5(15) | 59.8(18) | 67.7(18) | 8.3(14)  | -26.7(14) | -14.2(13) |
| O1  | 50.3(14) | 80.4(18) | 88.4(19) | 12.6(15) | -26.3(13) | -29.3(14) |
| O2  | 59.4(15) | 71.1(17) | 89.1(19) | 5.7(14)  | -42.0(14) | -8.2(13)  |

Table S5 Bond Lengths for **3ka**.

| Atom | Atom | Length/Å | Atom | Atom | Length/Å |
|------|------|----------|------|------|----------|
| Br1  | C9   | 1.909(3) | C7   | C8   | 1.382(5) |
| C1   | N1   | 1.396(4) | C8   | C9   | 1.380(5) |
| C1   | N2   | 1.376(4) | C9   | C10  | 1.376(5) |
| C1   | O1   | 1.199(4) | C11  | C12  | 1.377(5) |
| C2   | C3   | 1.526(4) | C11  | C16  | 1.370(5) |
| C2   | C11  | 1.530(4) | C12  | C13  | 1.393(5) |
| C2   | C17  | 1.515(5) | C13  | C14  | 1.363(6) |
| C2   | N2   | 1.505(4) | C14  | C15  | 1.363(6) |

|    |     |          |     |     |          |
|----|-----|----------|-----|-----|----------|
| C3 | C4  | 1.341(4) | C15 | C16 | 1.386(5) |
| C3 | N1  | 1.397(4) | C17 | C18 | 1.309(5) |
| C4 | C5  | 1.443(4) | C18 | C19 | 1.492(6) |
| C5 | C6  | 1.402(4) | C18 | C20 | 1.514(5) |
| C5 | C10 | 1.393(4) | C21 | O2  | 1.430(5) |
| C6 | C7  | 1.391(4) | N2  | O2  | 1.396(3) |
| C6 | N1  | 1.386(4) |     |     |          |

Table S6 Bond Angles for **3ka**.

| Atom | Atom | Atom | Angle/°  | Atom | Atom | Atom | Angle/°  |
|------|------|------|----------|------|------|------|----------|
| N2   | C1   | N1   | 104.0(3) | C10  | C9   | Br1  | 117.9(3) |
| O1   | C1   | N1   | 127.0(3) | C10  | C9   | C8   | 123.5(3) |
| O1   | C1   | N2   | 128.9(3) | C9   | C10  | C5   | 117.4(3) |
| C3   | C2   | C11  | 113.6(3) | C12  | C11  | C2   | 118.8(3) |
| C17  | C2   | C3   | 111.1(3) | C16  | C11  | C2   | 122.5(3) |
| C17  | C2   | C11  | 116.1(3) | C16  | C11  | C12  | 118.6(3) |
| N2   | C2   | C3   | 97.2(2)  | C11  | C12  | C13  | 120.8(4) |
| N2   | C2   | C11  | 107.8(3) | C14  | C13  | C12  | 119.7(4) |
| N2   | C2   | C17  | 109.1(3) | C15  | C14  | C13  | 119.7(4) |
| C4   | C3   | C2   | 142.3(3) | C14  | C15  | C16  | 120.7(4) |
| C4   | C3   | N1   | 109.7(3) | C11  | C16  | C15  | 120.3(4) |
| N1   | C3   | C2   | 107.9(3) | C18  | C17  | C2   | 129.0(3) |
| C3   | C4   | C5   | 106.6(3) | C17  | C18  | C19  | 125.0(4) |
| C6   | C5   | C4   | 108.4(3) | C17  | C18  | C20  | 120.0(4) |
| C10  | C5   | C4   | 132.7(3) | C19  | C18  | C20  | 115.0(4) |
| C10  | C5   | C6   | 118.9(3) | C1   | N1   | C3   | 112.8(3) |
| C7   | C6   | C5   | 123.3(3) | C6   | N1   | C1   | 136.8(3) |
| N1   | C6   | C5   | 105.9(3) | C6   | N1   | C3   | 109.3(3) |
| N1   | C6   | C7   | 130.8(3) | C1   | N2   | C2   | 114.3(3) |
| C8   | C7   | C6   | 116.5(3) | C1   | N2   | O2   | 116.0(3) |
| C9   | C8   | C7   | 120.4(3) | O2   | N2   | C2   | 116.4(3) |
| C8   | C9   | Br1  | 118.6(3) | N2   | O2   | C21  | 109.8(3) |

Table S7 Torsion Angles for **3ka**.

| A   | B  | C   | D  | Angle/°   | A   | B  | C  | D  | Angle/°   |
|-----|----|-----|----|-----------|-----|----|----|----|-----------|
| Br1 | C9 | C10 | C5 | -178.3(2) | C10 | C5 | C6 | N1 | -179.7(3) |

|     |     |     |     |           |     |     |     |     |           |
|-----|-----|-----|-----|-----------|-----|-----|-----|-----|-----------|
| C1  | N2  | O2  | C21 | 107.3(4)  | C11 | C2  | C3  | C4  | -48.5(6)  |
| C2  | C3  | C4  | C5  | 177.5(4)  | C11 | C2  | C3  | N1  | 128.7(3)  |
| C2  | C3  | N1  | C1  | -8.0(4)   | C11 | C2  | C17 | C18 | 66.9(5)   |
| C2  | C3  | N1  | C6  | -177.9(3) | C11 | C2  | N2  | C1  | -137.8(3) |
| C2  | C11 | C12 | C13 | -175.8(3) | C11 | C2  | N2  | O2  | 82.8(3)   |
| C2  | C11 | C16 | C15 | 176.6(3)  | C11 | C12 | C13 | C14 | -1.3(6)   |
| C2  | C17 | C18 | C19 | -2.8(6)   | C12 | C11 | C16 | C15 | -0.4(6)   |
| C2  | C17 | C18 | C20 | 179.2(4)  | C12 | C13 | C14 | C15 | 0.3(7)    |
| C2  | N2  | O2  | C21 | -114.0(4) | C13 | C14 | C15 | C16 | 0.6(7)    |
| C3  | C2  | C11 | C12 | -45.6(4)  | C14 | C15 | C16 | C11 | -0.5(7)   |
| C3  | C2  | C11 | C16 | 137.5(3)  | C16 | C11 | C12 | C13 | 1.3(6)    |
| C3  | C2  | C17 | C18 | -65.0(5)  | C17 | C2  | C3  | C4  | 84.7(6)   |
| C3  | C2  | N2  | C1  | -20.1(4)  | C17 | C2  | C3  | N1  | -98.1(3)  |
| C3  | C2  | N2  | O2  | -159.5(3) | C17 | C2  | C11 | C12 | -176.3(3) |
| C3  | C4  | C5  | C6  | -0.9(4)   | C17 | C2  | C11 | C16 | 6.7(5)    |
| C3  | C4  | C5  | C10 | 180.0(4)  | C17 | C2  | N2  | C1  | 95.3(3)   |
| C4  | C3  | N1  | C1  | 170.2(3)  | C17 | C2  | N2  | O2  | -44.2(4)  |
| C4  | C3  | N1  | C6  | 0.3(4)    | N1  | C1  | N2  | C2  | 16.5(4)   |
| C4  | C5  | C6  | C7  | -179.6(3) | N1  | C1  | N2  | O2  | 156.1(3)  |
| C4  | C5  | C6  | N1  | 1.0(4)    | N1  | C3  | C4  | C5  | 0.4(4)    |
| C4  | C5  | C10 | C9  | 178.7(3)  | N1  | C6  | C7  | C8  | 179.7(3)  |
| C5  | C6  | C7  | C8  | 0.4(5)    | N2  | C1  | N1  | C3  | -4.8(4)   |
| C5  | C6  | N1  | C1  | -167.2(4) | N2  | C1  | N1  | C6  | 161.3(4)  |
| C5  | C6  | N1  | C3  | -0.8(4)   | N2  | C2  | C3  | C4  | -161.5(5) |
| C6  | C5  | C10 | C9  | -0.4(5)   | N2  | C2  | C3  | N1  | 15.6(3)   |
| C6  | C7  | C8  | C9  | 0.1(5)    | N2  | C2  | C11 | C12 | 60.9(4)   |
| C7  | C6  | N1  | C1  | 13.5(6)   | N2  | C2  | C11 | C16 | -116.1(4) |
| C7  | C6  | N1  | C3  | 179.9(3)  | N2  | C2  | C17 | C18 | -171.1(3) |
| C7  | C8  | C9  | Br1 | 178.4(3)  | O1  | C1  | N1  | C3  | 178.5(4)  |
| C7  | C8  | C9  | C10 | -0.8(6)   | O1  | C1  | N1  | C6  | -15.5(7)  |
| C8  | C9  | C10 | C5  | 0.9(5)    | O1  | C1  | N2  | C2  | -166.8(4) |
| C10 | C5  | C6  | C7  | -0.3(5)   | O1  | C1  | N2  | O2  | -27.2(6)  |

Table S8 Hydrogen Atom Coordinates ( $\text{\AA}\times 10^4$ ) and Isotropic Displacement Parameters ( $\text{\AA}^2\times 10^3$ ) for **3ka**.

| Atom | <i>x</i> | <i>y</i> | <i>z</i> | U(eq) |
|------|----------|----------|----------|-------|
| H4   | 5920     | 3495     | 7369     | 59    |
| H7   | 10886    | 6490     | 5919     | 67    |
| H8   | 9045     | 7808     | 4946     | 72    |
| H10  | 5036     | 5651     | 5921     | 64    |

|      |       |       |       |     |
|------|-------|-------|-------|-----|
| H12  | 7136  | 4175  | 9702  | 80  |
| H13  | 5287  | 3974  | 11508 | 93  |
| H14  | 4974  | 2008  | 12321 | 96  |
| H15  | 6516  | 257   | 11351 | 96  |
| H16  | 8421  | 448   | 9569  | 77  |
| H17  | 11509 | 1129  | 7557  | 65  |
| H19A | 7038  | -128  | 7747  | 145 |
| H19B | 7225  | 760   | 6678  | 145 |
| H19C | 6783  | 1332  | 7848  | 145 |
| H20A | 11962 | -567  | 6604  | 148 |
| H20B | 10530 | -560  | 5919  | 148 |
| H20C | 10327 | -1344 | 7046  | 148 |
| H21A | 12438 | 3654  | 9807  | 157 |
| H21B | 13237 | 2254  | 10058 | 157 |
| H21C | 11085 | 2692  | 10342 | 157 |

### 9.Characterization data for products (3aa-3ta, 3ab-3aq, 4aa-4ba, 5, 6)

#### 2-Methoxy-1-(2-methylprop-1-en-1-yl)-1-phenyl-1,2-dihydro-3H-imidazo[1,5-a]indol-3-one (3aa)

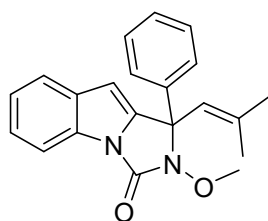

Yellow oil. 47.2 mg, Yield: 71%, column chromatography eluent, EtOAc/PE = 1:40 → 1:30;

<sup>1</sup>H NMR (400 MHz, CDCl<sub>3</sub>) δ 8.01 (d, *J* = 8.1 Hz, 1H), 7.57 (d, *J* = 7.8 Hz, 1H), 7.52 – 7.48 (m, 2H), 7.37 – 7.30 (m, 4H), 7.27 – 7.24 (m, 1H), 6.33 (s, 1H), 5.92 (s, 1H), 3.70 (s, 3H), 1.83 (s, 3H), 1.46 (s, 3H). <sup>13</sup>C NMR (100 MHz, CDCl<sub>3</sub>) δ 151.1, 140.6, 140.4, 139.7, 132.5, 130.8, 128.6, 128.4, 127.5, 123.7, 123.2, 123.1, 121.2, 113.0, 99.3, 69.6, 65.5, 26.6, 20.4. HRMS (ESI) *m/z* calcd for C<sub>21</sub>H<sub>20</sub>N<sub>2</sub>O<sub>2</sub> [M + H]<sup>+</sup> 333.1598, found 333.1598.

#### 2-Methoxy-8-methyl-1-(2-methylprop-1-en-1-yl)-1-phenyl-1,2-dihydro-3H-imidazo[1,5-a]indol-3-one (3ba)

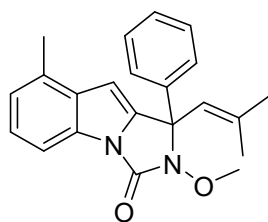

White solid. 40.9 mg, Yield: 59%, mp 141-142 °C. column chromatography eluent, EtOAc/PE = 1:40 → 1:30;

<sup>1</sup>H NMR (400 MHz, CDCl<sub>3</sub>) δ 7.85 (d, *J* = 8.1 Hz, 1H), 7.55 – 7.52 (m, 2H), 7.40 – 7.29 (m, 3H), 7.22 (d, *J* = 8.0 Hz, 1H), 7.06 (d, *J* = 7.3 Hz, 1H), 6.34 (s, 1H), 5.92 (s, 1H), 3.70 (s, 3H), 2.51 (s, 3H), 1.83 (s, 3H), 1.47 (s, 3H). <sup>13</sup>C NMR (100 MHz, CDCl<sub>3</sub>) δ 151.2, 140.6, 139.8, 139.8, 132.2, 130.7, 130.5, 128.6, 128.4, 127.5, 123.8, 123.5, 123.2, 110.4, 97.7, 69.6, 65.4, 26.6, 20.4, 18.7. HRMS (ESI) *m/z* calcd for C<sub>22</sub>H<sub>22</sub>N<sub>2</sub>O<sub>2</sub> [M + H]<sup>+</sup> 347.1754, found 347.1752.

**2,8-Dimethoxy-1-(2-methylprop-1-en-1-yl)-1-phenyl-1,2-dihydro-3H-imidazo[1,5-a]indol-3-one (3ca)**

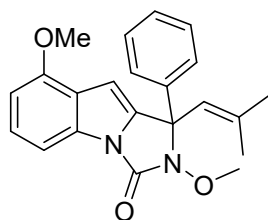

Yellow solid. 46.4 mg, Yield: 64%, mp 163-164 °C. column chromatography eluent, EtOAc/PE = 1:40 → 1:30;

<sup>1</sup>H NMR (400 MHz, CDCl<sub>3</sub>) δ 7.63 (d, *J* = 8.1 Hz, 1H), 7.53 – 7.48 (m, 2H), 7.36 – 7.31 (m, 3H), 7.25 (t, *J* = 8.1 Hz, 1H), 6.69 (d, *J* = 8.0 Hz, 1H), 6.47 (s, 1H), 5.92 (s, 1H), 3.92 (s, 3H), 3.69 (s, 3H), 1.81 (s, 3H), 1.46 (s, 3H). <sup>13</sup>C NMR (100 MHz, CDCl<sub>3</sub>) δ 153.2, 151.1, 140.5, 139.7, 138.7, 131.9, 128.6, 128.4, 127.6, 124.9, 123.4, 122.7, 106.1, 103.4, 96.6, 69.7, 65.5, 55.4, 26.6, 20.4. HRMS (ESI) *m/z* calcd for C<sub>22</sub>H<sub>22</sub>N<sub>2</sub>O<sub>3</sub> [M + H]<sup>+</sup> 363.1703, found 363.1704.

**8-(Benzyloxy)-2-methoxy-1-(2-methylprop-1-en-1-yl)-1-phenyl-1,2-dihydro-3H-imidazo[1,5-a]indol-3-one (3da)**

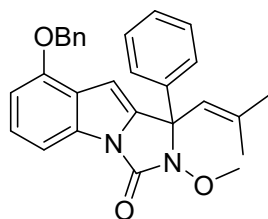

Yellow solid. 61.5 mg, Yield: 70%, mp 187-188 °C. column chromatography eluent, EtOAc/PE = 1:40 → 1:20;

<sup>1</sup>H NMR (400 MHz, CDCl<sub>3</sub>) δ 7.65 (d, *J* = 8.1 Hz, 1H), 7.50 (d, *J* = 7.2, 2H), 7.46 (d, *J* = 7.5 Hz, 2H), 7.40-7.29 (m, 6H), 7.26 – 7.21 (m, 1H), 6.76 (d, *J* = 8.0 Hz, 1H), 6.49 (s, 1H), 5.91 (s, 1H), 5.17 (s, 2H), 3.70 (s, 3H), 1.81 (s, 3H), 1.45 (s, 3H). <sup>13</sup>C NMR (100 MHz, CDCl<sub>3</sub>) δ 152.3, 151.1, 140.5, 139.7, 138.7, 136.9, 132.0, 128.5, 128.5, 128.3, 127.9, 127.4, 124.7, 123.2, 123.0, 106.3, 104.7, 96.7, 70.1, 69.6, 65.4, 26.5, 20.4. HRMS (ESI) *m/z* calcd for C<sub>28</sub>H<sub>26</sub>N<sub>2</sub>O<sub>3</sub> [M + Na]<sup>+</sup> 461.1836, found 461.1833.

**Methyl-2-methoxy-1-(2-methylprop-1-en-1-yl)-3-oxo-1-phenyl-2,3-dihydro-1*H*-imidazo[1,5-*a*]indole-8-carboxylate (3ea)**

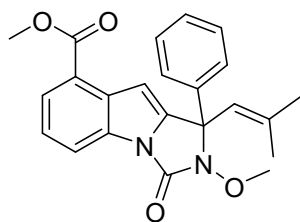

Yellow oil. 34.4 mg, Yield: 44%, column chromatography eluent, EtOAc/PE = 1:40 → 1:20;

**<sup>1</sup>H NMR** (400 MHz, CDCl<sub>3</sub>) δ 8.23 (d, *J* = 8.0 Hz, 1H), 8.01 (d, *J* = 7.6 Hz, 1H), 7.54 – 7.49 (m, 2H), 7.40–7.34 (m, 4H), 7.08 (s, 1H), 5.92 (s, 1H), 3.95 (s, 3H), 3.72 (s, 3H), 1.84 (s, 3H), 1.48 (s, 3H). **<sup>13</sup>C NMR** (100 MHz, CDCl<sub>3</sub>) δ 167.1, 150.6, 142.3, 141.2, 139.2, 132.5, 131.4, 128.7, 128.5, 127.4, 125.8, 123.0, 122.8, 122.2, 117.4, 100.2, 69.8, 65.5, 51.9, 26.6, 20.4. HRMS (ESI) *m/z* calcd for C<sub>23</sub>H<sub>22</sub>N<sub>2</sub>O<sub>4</sub> [M + H]<sup>+</sup> 391.1652, found 391.1649.

**8-Chloro-2-methoxy-1-(2-methylprop-1-en-1-yl)-1-phenyl-1,2-dihydro-3*H*-imidazo[1,5-*a*]indol-3-one (3fa)**

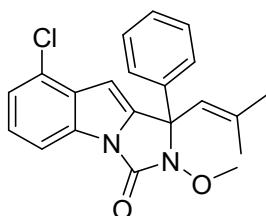

Yellow solid. 34.4 mg, Yield: 47%, mp 148–150 °C. column chromatography eluent, EtOAc/PE = 1:40 → 1:20;

**<sup>1</sup>H NMR** (400 MHz, CDCl<sub>3</sub>) δ 7.92 (d, *J* = 8.0 Hz, 1H), 7.53 – 7.46 (m, 2H), 7.40 – 7.33 (m, 3H), 7.25 – 7.22 (m, 2H), 6.46 (s, 1H), 5.91 (s, 1H), 3.71 (s, 3H), 1.84 (s, 3H), 1.48 (s, 3H). **<sup>13</sup>C NMR** (100 MHz, CDCl<sub>3</sub>) δ 150.5, 141.1, 140.9, 139.2, 131.3, 131.2, 128.7, 128.5, 127.4, 126.2, 124.5, 122.9, 122.8, 111.4, 97.5, 69.7, 65.5, 26.6, 20.4. HRMS (ESI) *m/z* calcd for C<sub>21</sub>H<sub>19</sub>ClN<sub>2</sub>O<sub>2</sub> [M + H]<sup>+</sup> 367.1208, found 367.1206.

**2-Methoxy-7-methyl-1-(2-methylprop-1-en-1-yl)-1-phenyl-1,2-dihydro-3*H*-imidazo[1,5-*a*]indol-3-one (3ga)**

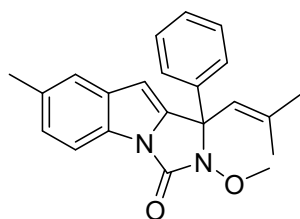

Yellow oil. 43.6 mg, Yield: 63%, column chromatography eluent, EtOAc/PE = 1:40 → 1:30;

**<sup>1</sup>H NMR** (400 MHz, CDCl<sub>3</sub>) δ 7.89 (d, *J* = 8.3 Hz, 1H), 7.51 – 7.47 (m, 2H), 7.36 – 7.30 (m, 4H), 7.13 (d, *J* = 8.0 Hz, 1H), 6.24 (s, 1H), 5.92 (s, 1H), 3.69 (s, 3H), 2.43 (s, 3H), 1.81 (s, 3H), 1.45 (s, 3H). **<sup>13</sup>C NMR** (100 MHz, CDCl<sub>3</sub>) δ 151.1, 140.4, 140.4, 139.7, 132.8, 132.6, 128.9, 128.5, 128.3, 127.4, 125.0, 123.2, 121.0, 112.4, 98.9, 69.5, 65.3, 26.5, 21.4, 20.2. HRMS (ESI) *m/z* calcd for C<sub>22</sub>H<sub>22</sub>N<sub>2</sub>O<sub>2</sub> [M + H]<sup>+</sup> 347.1754, found 347.1754.

**2,7-Dimethoxy-1-(2-methylprop-1-en-1-yl)-1-phenyl-1,2-dihydro-3H-imidazo[1,5-a]indol-3-one (3ha)**

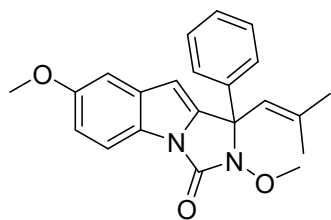

Yellow solid. 45.6 mg, Yield: 63%, mp 122-123 °C. column chromatography eluent, EtOAc/PE = 1:40 → 1:20;

**<sup>1</sup>H NMR** (400 MHz, CDCl<sub>3</sub>) δ 7.89 (d, *J* = 8.8 Hz, 1H), 7.53 – 7.47 (m, 2H), 7.38 – 7.30 (m, 3H), 7.04 (d, *J* = 2.5 Hz, 1H), 6.94 (dd, *J* = 8.8, 2.5 Hz, 1H), 6.26 (s, 1H), 5.92 (s, 1H), 3.82 (s, 3H), 3.69 (s, 3H), 1.82 (s, 3H), 1.45 (s, 3H). **<sup>13</sup>C NMR** (100 MHz, CDCl<sub>3</sub>) δ 156.4, 151.2, 141.2, 140.6, 139.7, 133.6, 128.7, 128.4, 127.5, 125.6, 123.3, 113.6, 112.8, 104.0, 99.3, 69.7, 65.5, 55.8, 26.6, 20.4. HRMS (ESI) *m/z* calcd for C<sub>22</sub>H<sub>22</sub>N<sub>2</sub>O<sub>3</sub> [M + H]<sup>+</sup> 363.1703, found 363.1702.

**7-Fluoro-2-methoxy-1-(2-methylprop-1-en-1-yl)-1-phenyl-1,2-dihydro-3H-imidazo[1,5-a]indol-3-one (3ia)**

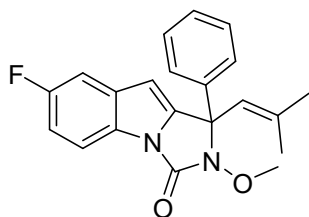

White solid. 37.1 mg, Yield: 53%, mp 149-150 °C. column chromatography eluent, EtOAc/PE = 1:40 → 1:30;

**<sup>1</sup>H NMR** (400 MHz, CDCl<sub>3</sub>) δ 7.97 – 7.91 (m, 1H), 7.52 – 7.46 (m, 2H), 7.39 – 7.33 (m, 3H), 7.25 – 7.19 (m, 1H), 7.06 (t, *J* = 9.2 Hz, 1H), 6.30 (s, 1H), 5.91 (s, 1H), 3.70 (s, 3H), 1.83 (s, 3H). **<sup>13</sup>C NMR** (100 MHz, CDCl<sub>3</sub>) δ 159.48 (d, *J*<sub>C-F</sub> = 237.8 Hz), 150.8, 142.1, 140.9, 139.4, 133.4 (d, *J*<sub>C-F</sub> = 10.2 Hz), 128.7, 128.5, 127.4, 127.2, 122.9, 113.6 (d, *J*<sub>C-F</sub> = 9.7 Hz), 111.8 (d, *J*<sub>C-F</sub> = 25.7 Hz), 106.7 (d, *J*<sub>C-F</sub> = 24.1 Hz), 99.1 (d, *J*<sub>C-F</sub> = 4.2 Hz), 69.6, 65.5, 26.6, 20.4. **<sup>19</sup>F NMR** (376 MHz, CDCl<sub>3</sub>) δ -119.5. HRMS (ESI) *m/z* calcd for C<sub>21</sub>H<sub>19</sub>FN<sub>2</sub>O<sub>2</sub> [M + H]<sup>+</sup> 351.1503, found 351.1503.

**7-Chloro-2-methoxy-1-(2-methylprop-1-en-1-yl)-1-phenyl-1,2-dihydro-3H-imidazo[1,5-a]indol-3-one (3ja)**

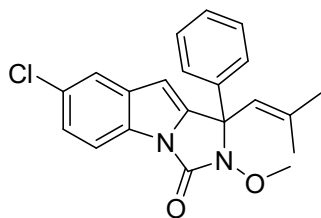

Yellow solid. 33.7 mg, Yield: 46%, mp 160-161 °C. column chromatography eluent, EtOAc/PE = 1:40 → 1:30;

**<sup>1</sup>H NMR** (400 MHz, CDCl<sub>3</sub>) δ 7.92 (d, *J* = 8.6 Hz, 1H), 7.53 (s, 1H), 7.51 – 7.46 (m, 2H), 7.39 – 7.33 (m, 3H), 7.27 (d, *J* = 8.7, 1H), 6.28 (s, 1H), 5.91 (s, 1H), 3.70 (s, 3H), 1.83 (s, 3H), 1.45 (s, 3H). **<sup>13</sup>C NMR** (100 MHz, CDCl<sub>3</sub>) δ 150.5, 141.7, 141.0, 139.2, 133.6, 129.0, 128.7, 128.5, 127.3, 123.9, 122.8,



120.8, 113.7, 98.6, 69.6, 65.4, 26.5, 20.3. HRMS (ESI)  $m/z$  calcd for  $C_{21}H_{19}ClN_2O_2$   $[M + H]^+$  367.1208, found 367.1208.

**7-Bromo-2-methoxy-1-(2-methylprop-1-en-1-yl)-1-phenyl-1,2-dihydro-3H-imidazo[1,5-a]indol-3-one (3ka)**

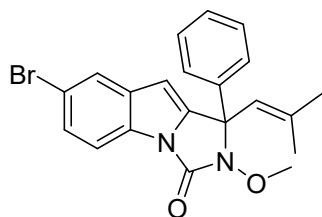

White solid. 46.0 mg, Yield: 56%, mp 166-167 °C. column chromatography eluent, EtOAc/PE = 1:40 → 1:30;

$^1H$  NMR (400 MHz,  $CDCl_3$ )  $\delta$  7.88 (d,  $J = 8.6$  Hz, 1H), 7.70 (d,  $J = 1.9$  Hz, 1H), 7.50 – 7.48 (m, 1H), 7.47 (d,  $J = 1.8$  Hz, 1H), 7.42 (dd,  $J = 8.6, 1.9$  Hz, 1H), 7.38 – 7.33 (m, 3H), 6.28 (s, 1H), 5.90 (s, 1H), 3.69 (s, 3H), 1.83 (s, 3H), 1.45 (s, 3H).  $^{13}C$  NMR (100 MHz,  $CDCl_3$ )  $\delta$  150.6, 141.6, 141.0, 139.3, 134.2, 129.4, 128.7, 128.6, 127.4, 126.6, 123.9, 122.8, 116.3, 114.2, 98.5, 69.6, 65.5, 26.6, 20.4. HRMS (ESI)  $m/z$  calcd for  $C_{21}H_{19}BrN_2O_2$   $[M + H]^+$  411.0703, found 411.0702.

**Methyl-2-methoxy-1-(2-methylprop-1-en-1-yl)-3-oxo-1-phenyl-2,3-dihydro-1H-imidazo[1,5-a]indole-7-carboxylate (3la)**

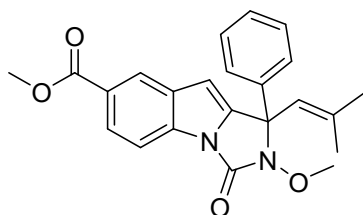

White solid. 37.5 mg, Yield: 48%, mp 184-185 °C. column chromatography eluent, EtOAc/PE = 1:40 → 1:20;

$^1H$  NMR (400 MHz,  $CDCl_3$ )  $\delta$  8.33 (s, 1H), 8.04 (s, 2H), 7.53 – 7.47 (m, 2H), 7.39 – 7.32 (m, 3H), 6.42 (s, 1H), 5.92 (s, 1H), 3.94 (s, 3H), 3.70 (s, 3H), 1.84 (s, 3H), 1.47 (s, 3H).  $^{13}C$  NMR (100 MHz,  $CDCl_3$ )  $\delta$  167.4, 150.4, 141.5, 141.1, 139.3, 133.3, 132.3, 128.8, 128.6, 127.4, 125.1, 125.1, 123.7, 122.9, 112.6, 99.8, 69.7, 65.5, 52.1, 26.6, 20.4. HRMS (ESI)  $m/z$  calcd for  $C_{23}H_{22}N_2O_4$   $[M + H]^+$  391.1652, found 391.1651.

**2-Methoxy-1-(2-methylprop-1-en-1-yl)-3-oxo-1-phenyl-2,3-dihydro-1H-imidazo[1,5-a]indole-7-carbonitrile (3ma)**

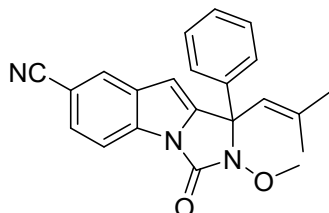

White solid. 22.2 mg, Yield: 31%, mp 203-204 °C. column chromatography eluent, EtOAc/PE = 1:30 → 1:10;

$^1H$  NMR (400 MHz,  $CDCl_3$ )  $\delta$  8.08 (d,  $J = 8.4$  Hz, 1H), 7.92 (s, 1H), 7.57 (d,  $J = 8.4$  Hz, 1H), 7.50 – 7.45 (m, 2H), 7.40 – 7.34 (m, 3H), 6.41 (s, 1H), 5.90 (s, 1H), 3.70 (s, 3H), 1.84 (s, 3H), 1.46 (s, 3H).

$^{13}\text{C}$  NMR (100 MHz,  $\text{CDCl}_3$ )  $\delta$  150.0, 142.6, 141.7, 139.0, 132.6, 132.5, 129.0, 128.9, 127.4, 127.0, 126.4, 122.7, 119.8, 113.9, 106.6, 99.1, 69.8, 65.7, 26.7, 20.6. HRMS (ESI)  $m/z$  calcd for  $\text{C}_{22}\text{H}_{19}\text{N}_3\text{O}_2$   $[\text{M} + \text{Na}]^+$  380.1369, found 380.1372.

**2-Methoxy-6-methyl-1-(2-methylprop-1-en-1-yl)-1-phenyl-1,2-dihydro-3H-imidazo[1,5-a]indol-3-one (3na)**

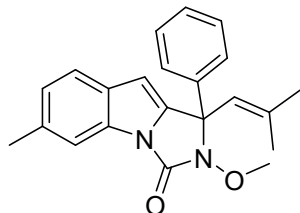

White solid. 42.3 mg, Yield: 61%, mp 132-133 °C. column chromatography eluent, EtOAc/PE = 1:40  $\rightarrow$  1:30;

$^1\text{H}$  NMR (400 MHz,  $\text{CDCl}_3$ )  $\delta$  7.84 (s, 1H), 7.53 – 7.47 (m, 2H), 7.44 (d,  $J$  = 8.1 Hz, 1H), 7.37 – 7.28 (m, 3H), 7.07 (d,  $J$  = 8.1 Hz, 1H), 6.27 (s, 1H), 5.92 (s, 1H), 3.69 (s, 3H), 2.48 (s, 3H), 1.82 (s, 3H), 1.45 (s, 3H).  $^{13}\text{C}$  NMR (100 MHz,  $\text{CDCl}_3$ )  $\delta$  151.3, 140.5, 139.9, 139.7, 134.0, 131.2, 130.3, 128.6, 128.4, 127.5, 124.7, 123.4, 120.8, 113.1, 99.3, 69.7, 65.5, 26.6, 21.7, 20.4. HRMS (ESI)  $m/z$  calcd for  $\text{C}_{22}\text{H}_{22}\text{N}_2\text{O}_2$   $[\text{M} + \text{H}]^+$  347.1754, found 347.1753.

**2,6-Dimethoxy-1-(2-methylprop-1-en-1-yl)-1-phenyl-1,2-dihydro-3H-imidazo[1,5-a]indol-3-one (3oa)**

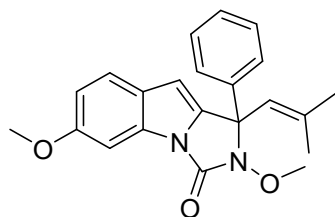

Yellow oil. 42.0 mg, Yield: 58%, column chromatography eluent, EtOAc/PE = 1:40  $\rightarrow$  1:20;

$^1\text{H}$  NMR (400 MHz,  $\text{CDCl}_3$ )  $\delta$  7.54 – 7.48 (m, 3H), 7.42 (d,  $J$  = 8.7 Hz, 1H), 7.37 – 7.31 (m, 3H), 6.89 (d,  $J$  = 8.7 Hz, 1H), 6.25 (s, 1H), 5.92 (s, 1H), 3.87 (s, 3H), 3.70 (s, 3H), 1.82 (s, 3H), 1.45 (s, 3H).  $^{13}\text{C}$  NMR (100 MHz,  $\text{CDCl}_3$ )  $\delta$  157.5, 151.2, 140.4, 139.9, 138.9, 131.7, 128.6, 128.4, 127.5, 126.2, 123.5, 121.8, 113.1, 99.3, 96.5, 69.7, 65.5, 55.8, 26.6, 20.4. HRMS (ESI)  $m/z$  calcd for  $\text{C}_{22}\text{H}_{22}\text{N}_2\text{O}_3$   $[\text{M} + \text{H}]^+$  363.1703, found 363.1703.

**6-Fluoro-2-methoxy-1-(2-methylprop-1-en-1-yl)-1-phenyl-1,2-dihydro-3H-imidazo[1,5-a]indol-3-one (3pa)**

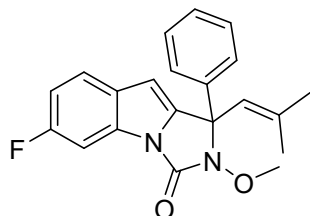

Yellow solid. 51.8 mg, Yield: 74%, mp 125-126 °C. column chromatography eluent, EtOAc/PE = 1:40  $\rightarrow$  1:30;

$^1\text{H}$  NMR (400 MHz,  $\text{CDCl}_3$ )  $\delta$  7.71 (d,  $J$  = 8.5 Hz, 1H), 7.54 – 7.45 (m, 3H), 7.40 – 7.31 (m, 3H), 7.00 (t,  $J$  = 9.0 Hz, 1H), 6.31 (s, 1H), 5.92 (s, 1H), 3.69 (s, 3H), 1.83 (s, 3H), 1.46 (s, 3H).

$^{13}\text{C}$  NMR (100 MHz,  $\text{CDCl}_3$ )  $\delta$  161.5, 159.1 (d,  $J_{\text{C-F}} = 239.9$  Hz), 150.6, 140.7, 140.6 (d,  $J_{\text{C-F}} = 3.9$  Hz), 139.4, 130.6 (d,  $J_{\text{C-F}} = 13.0$  Hz), 128.7, 128.7, 128.6, 128.5, 127.4, 123.0, 121.8 (d,  $J_{\text{C-F}} = 9.8$  Hz), 111.5 (d,  $J_{\text{C-F}} = 24.1$  Hz), 100.0 (d,  $J_{\text{C-F}} = 27.2$  Hz), 99.0, 69.6, 65.5, 26.5, 20.3.  $^{19}\text{F}$  NMR (376 MHz,  $\text{CDCl}_3$ )  $\delta$  -117.5. HRMS (ESI)  $m/z$  calcd for  $\text{C}_{21}\text{H}_{19}\text{FN}_2\text{O}_2$   $[\text{M} + \text{H}]^+$  351.1503, found 351.1503.

**6-Chloro-2-methoxy-1-(2-methylprop-1-en-1-yl)-1-phenyl-1,2-dihydro-3H-imidazo[1,5-a]indol-3-one (3qa)**

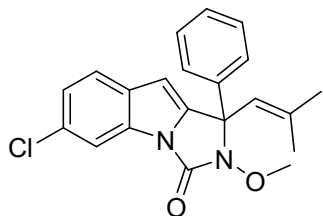

Yellow solid. 44.7 mg, Yield: 61%, mp 135-136 °C. column chromatography eluent, EtOAc/PE = 1:40 → 1:30;

$^1\text{H}$  NMR (400 MHz,  $\text{CDCl}_3$ )  $\delta$  8.02 (s, 1H), 7.51 – 7.44 (m, 3H), 7.39 – 7.33 (m, 3H), 7.21 (d,  $J = 8.5$  Hz, 1H), 6.31 (s, 1H), 5.91 (s, 1H), 3.69 (s, 3H), 1.83 (s, 3H), 1.45 (s, 3H).  $^{13}\text{C}$  NMR (100 MHz,  $\text{CDCl}_3$ )  $\delta$  150.5, 141.0, 140.9, 139.4, 131.0, 131.0, 129.7, 128.7, 128.6, 127.4, 123.8, 123.0, 122.0, 113.1, 99.1, 69.7, 65.6, 26.6, 20.4. HRMS (ESI)  $m/z$  calcd for  $\text{C}_{21}\text{H}_{19}\text{ClN}_2\text{O}_2$   $[\text{M} + \text{H}]^+$  367.1208, found 367.1207.

**6-Bromo-2-methoxy-1-(2-methylprop-1-en-1-yl)-1-phenyl-1,2-dihydro-3H-imidazo[1,5-a]indol-3-one (3ra)**

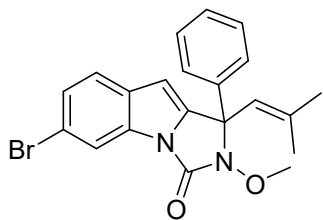

White solid. 47.6 mg, Yield: 58%, mp 156-157 °C. column chromatography eluent, EtOAc/PE = 1:40 → 1:30;

$^1\text{H}$  NMR (400 MHz,  $\text{CDCl}_3$ )  $\delta$  8.18 (s, 1H), 7.51 – 7.46 (m, 2H), 7.42 (d,  $J = 8.4$  Hz, 1H), 7.38 – 7.33 (m, 4H), 6.30 (s, 1H), 5.91 (s, 1H), 3.69 (s, 3H), 1.83 (s, 3H), 1.45 (s, 3H).  $^{13}\text{C}$  NMR (100 MHz,  $\text{CDCl}_3$ )  $\delta$  172.7, 150.5, 141.0, 140.9, 139.4, 131.4, 131.4, 128.7, 128.6, 127.4, 126.4, 122.9, 122.4, 117.2, 116.1, 99.1, 69.7, 65.6, 26.6, 20.4. HRMS (ESI)  $m/z$  calcd for  $\text{C}_{21}\text{H}_{19}\text{BrN}_2\text{O}_2$   $[\text{M} + \text{Na}]^+$  433.0522, found 433.0520.

**2-Methoxy-5-methyl-1-(2-methylprop-1-en-1-yl)-1-phenyl-1,2-dihydro-3H-imidazo[1,5-a]indol-3-one (3sa)**

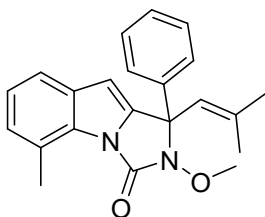

White solid. 38.8 mg, Yield: 56%, mp 147-148 °C. column chromatography eluent, EtOAc/PE = 1:50 → 1:40;

<sup>1</sup>H NMR (400 MHz, CDCl<sub>3</sub>) δ 7.54 – 7.49 (m, 2H), 7.39 – 7.31 (m, 4H), 7.15 (t, *J* = 7.5 Hz, 1H), 7.08 (d, *J* = 7.3 Hz, 1H), 6.33 (s, 1H), 5.91 (s, 1H), 3.72 (s, 3H), 2.93 (s, 3H), 1.83 (s, 3H), 1.45 (s, 3H). <sup>13</sup>C NMR (100 MHz, CDCl<sub>3</sub>) δ 151.7, 141.5, 140.5, 140.0, 133.3, 131.4, 128.6, 128.3, 127.5, 126.3, 125.0, 123.5, 118.5, 100.0, 68.8, 65.3, 26.7, 21.0, 20.4. HRMS (ESI) *m/z* calcd for C<sub>22</sub>H<sub>22</sub>N<sub>2</sub>O<sub>2</sub> [M + H]<sup>+</sup> 347.1754, found 347.1752.

**2,5-Dimethoxy-1-(2-methylprop-1-en-1-yl)-1-phenyl-1,2-dihydro-3H-imidazo[1,5-*a*]indol-3-one (3ta)**

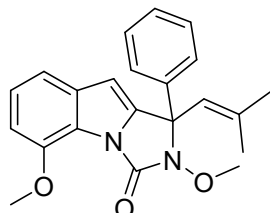

White solid. 21.8 mg, Yield: 30%, mp 160-161 °C. column chromatography eluent, EtOAc/PE = 1:20 → 1:10;

<sup>1</sup>H NMR (400 MHz, CDCl<sub>3</sub>) δ 7.52 – 7.46 (m, 2H), 7.38 – 7.29 (m, 3H), 7.21 – 7.11 (m, 2H), 6.82 (d, *J* = 7.4 Hz, 1H), 6.32 (s, 1H), 5.90 (s, 1H), 4.03 (s, 3H), 3.73 (s, 3H), 1.82 (s, 3H), 1.44 (s, 3H). <sup>13</sup>C NMR (100 MHz, CDCl<sub>3</sub>) δ 151.1, 140.5, 140.3, 138.2, 136.5, 132.5, 130.7, 129.3, 127.4, 123.6, 123.3, 123.0, 121.2, 112.9, 99.1, 69.5, 65.5, 26.5, 21.1, 20.4. HRMS (ESI) *m/z* calcd for C<sub>22</sub>H<sub>22</sub>N<sub>2</sub>O<sub>3</sub> [M + H]<sup>+</sup> 363.1703, found 363.1701.

**2-Methoxy-1-(2-methylprop-1-en-1-yl)-1-(*p*-tolyl)-1,2-dihydro-3H-imidazo[1,5-*a*]indol-3-one (3ab)**

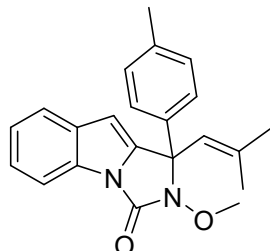

Yellow oil. 48.5 mg, Yield: 70%, column chromatography eluent, EtOAc/PE = 1:40 → 1:30;

<sup>1</sup>H NMR (400 MHz, CDCl<sub>3</sub>) δ 8.01 (d, *J* = 7.3 Hz, 1H), 7.57 (d, *J* = 6.84 Hz, 1H), 7.41 – 7.35 (m, 2H), 7.35 – 7.29 (m, 1H), 7.26 – 7.23 (m, 1H), 7.18 – 7.12 (m, 2H), 6.32 (s, 1H), 5.91 (s, 1H), 3.69 (s, 3H), 2.35 (s, 3H), 1.82 (s, 3H), 1.47 (s, 3H). <sup>13</sup>C NMR (100 MHz, CDCl<sub>3</sub>) δ 151.2, 140.6, 140.4, 138.3, 136.6, 132.6, 130.8, 129.4, 127.5, 123.7, 123.4, 123.1, 121.2, 113.0, 99.2, 69.6, 65.6, 26.6, 21.2, 20.5. HRMS (ESI) *m/z* calcd for C<sub>22</sub>H<sub>22</sub>N<sub>2</sub>O<sub>2</sub> [M + H]<sup>+</sup> 347.1754, found 347.1754.

**2-Methoxy-1-(4-methoxyphenyl)-1-(2-methylprop-1-en-1-yl)-1,2-dihydro-3H-imidazo[1,5-*a*]indol-3-one (3ac)**

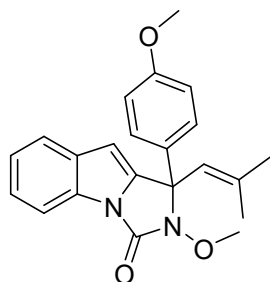

White solid. 51.5 mg, Yield: 71%, mp 103-104 °C. column chromatography eluent, EtOAc/PE = 1:40 → 1:20;

**<sup>1</sup>H NMR** (400 MHz, CDCl<sub>3</sub>) δ 8.02 (d, *J* = 7.2 Hz, 1H), 7.58 (d, *J* = 7.7 Hz, 1H), 7.45 – 7.36 (m, 2H), 7.35 – 7.22 (m, 2H), 6.91 – 6.83 (m, 2H), 6.33 (s, 1H), 5.91 (s, 1H), 3.80 (s, 3H), 3.68 (s, 3H), 1.81 (s, 3H), 1.49 (s, 3H). **<sup>13</sup>C NMR** (100 MHz, CDCl<sub>3</sub>) δ 159.7, 151.1, 140.6, 140.2, 132.6, 131.4, 130.8, 129.0, 123.7, 123.5, 123.1, 121.2, 113.9, 113.0, 99.3, 69.4, 65.6, 55.3, 26.6, 20.4. HRMS (ESI) *m/z* calcd for C<sub>22</sub>H<sub>22</sub>N<sub>2</sub>O<sub>3</sub> [M + H]<sup>+</sup> 363.1703, found 363.1705.

**1-(4-(Tert-butyl)phenyl)-2-methoxy-1-(2-methylprop-1-en-1-yl)-1,2-dihydro-3H-imidazo[1,5-a]indol-3-one (3ad)**

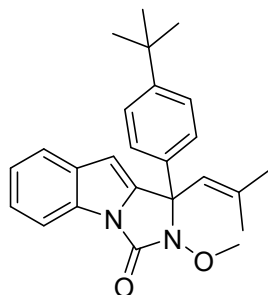

Yellow oil. 48.9 mg, Yield: 63%, column chromatography eluent, EtOAc/PE = 1:40 → 1:30;

**<sup>1</sup>H NMR** (400 MHz, CDCl<sub>3</sub>) δ 8.01 (d, *J* = 8.0 Hz, 1H), 7.56 (d, *J* = 7.7 Hz, 1H), 7.44 – 7.29 (m, 5H), 7.27 – 7.22 (m, 1H), 6.32 (s, 1H), 5.92 (s, 1H), 3.72 (s, 3H), 1.82 (s, 3H), 1.46 (s, 3H), 1.30 (s, 9H). **<sup>13</sup>C NMR** (100 MHz, CDCl<sub>3</sub>) δ 151.4, 151.1, 140.6, 136.6, 132.5, 130.8, 127.0, 125.4, 123.6, 123.3, 123.0, 121.1, 112.9, 99.1, 69.4, 65.4, 34.5, 31.3, 26.6, 20.2. HRMS (ESI) *m/z* calcd for C<sub>25</sub>H<sub>28</sub>N<sub>2</sub>O<sub>2</sub> [M + H]<sup>+</sup> 389.2224, found 389.2223.

**1-(4-Fluorophenyl)-2-methoxy-1-(2-methylprop-1-en-1-yl)-1,2-dihydro-3H-imidazo[1,5-a]indol-3-one (3ae)**

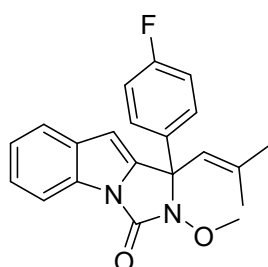

Yellow oil. 42.7 mg, Yield: 61%, column chromatography eluent, EtOAc/PE = 1:40 → 1:30;

**<sup>1</sup>H NMR** (400 MHz, CDCl<sub>3</sub>) δ 8.01 (d, *J* = 8.0 Hz, 1H), 7.58 (d, *J* = 7.9 Hz, 1H), 7.52 – 7.43 (m, 2H), 7.33 (t, *J* = 7.9 Hz, 1H), 7.26 (t, *J* = 6.8 Hz, 1H), 7.09 – 7.01 (m, 2H), 6.34 (s, 1H), 5.91 (s, 1H), 3.71 (s, 3H), 1.82 (s, 3H), 1.47 (s, 3H). **<sup>13</sup>C NMR** (100 MHz, CDCl<sub>3</sub>) δ 162.6 (d, *J*<sub>C-F</sub> = 246.6 Hz), 151.0, 140.6, 140.0, 135.4 (d, *J*<sub>C-F</sub> = 3.2 Hz), 132.4, 130.7, 129.4 (d, *J*<sub>C-F</sub> = 8.1 Hz), 123.8, 123.2, 123.2, 121.2, 115.4 (d, *J*<sub>C-F</sub> = 21.5 Hz), 112.9, 99.4, 69.1, 65.5, 26.5, 20.3. **<sup>19</sup>F NMR** (376 MHz, CDCl<sub>3</sub>) δ -113.3. HRMS (ESI) *m/z* calcd for C<sub>21</sub>H<sub>19</sub>FN<sub>2</sub>O<sub>2</sub> [M + H]<sup>+</sup> 351.1503, found 351.1502.

**1-(4-Chlorophenyl)-2-methoxy-1-(2-methylprop-1-en-1-yl)-1,2-dihydro-3H-imidazo[1,5-a]indol-3-one (3af)**

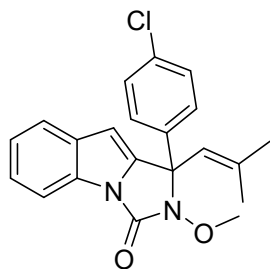

Yellow solid. 35.2 mg, Yield: 48%, mp 122-123 °C. column chromatography eluent, EtOAc/PE = 1:40 → 1:30;

**<sup>1</sup>H NMR** (400 MHz, CDCl<sub>3</sub>) δ 8.01 (d, *J* = 8.0 Hz, 1H), 7.57 (d, *J* = 7.8 Hz, 1H), 7.47 – 7.42 (m, 2H), 7.29 – 7.36 (m, 3H), 7.25 (t, *J* = 6.8 Hz, 1H), 6.33 (s, 1H), 5.90 (s, 1H), 3.72 (s, 3H), 1.82 (s, 3H), 1.46 (s, 3H). **<sup>13</sup>C NMR** (100 MHz, CDCl<sub>3</sub>) δ 151.0, 140.9, 139.8, 138.2, 134.4, 132.4, 130.7, 129.0, 128.8, 123.9, 123.2, 122.9, 121.2, 112.9, 99.4, 69.1, 65.5, 26.5, 20.4. HRMS (ESI) *m/z* calcd for C<sub>21</sub>H<sub>19</sub>ClN<sub>2</sub>O<sub>2</sub> [M + H]<sup>+</sup> 367.1208, found 367.1208.

**1-(4-Bromophenyl)-2-methoxy-1-(2-methylprop-1-en-1-yl)-1,2-dihydro-3H-imidazo[1,5-a]indol-3-one (3ag)**

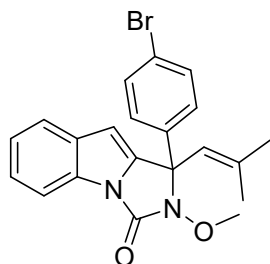

White solid. 41.9 mg, Yield: 51%, mp 130-131 °C. column chromatography eluent, EtOAc/PE = 1:40 → 1:30;

**<sup>1</sup>H NMR** (400 MHz, CDCl<sub>3</sub>) δ 8.01 (d, *J* = 7.9 Hz, 1H), 7.58 (d, *J* = 7.7 Hz, 1H), 7.52 – 7.46 (m, 2H), 7.41 – 7.31 (m, 3H), 7.29 – 7.23 (m, 1H), 6.33 (s, 1H), 5.89 (s, 1H), 3.72 (s, 3H), 1.82 (s, 3H), 1.46 (s, 3H). **<sup>13</sup>C NMR** (100 MHz, CDCl<sub>3</sub>) δ 151.0, 140.9, 139.7, 138.8, 132.4, 131.8, 130.8, 129.3, 123.9, 123.2, 122.8, 122.7, 121.3, 113.0, 99.5, 69.2, 65.6, 26.5, 20.5. HRMS (ESI) *m/z* calcd for C<sub>21</sub>H<sub>19</sub>BrN<sub>2</sub>O<sub>2</sub> [M + H]<sup>+</sup> 411.0703, found 411.0701.

**2-methoxy-1-(2-methylprop-1-en-1-yl)-1-(4-(trifluoromethyl)phenyl)-1,2-dihydro-3H-imidazo[1,5-a]indol-3-one (3ah)**

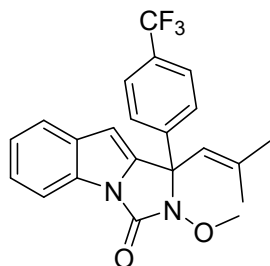

Yellow oil. 20.0 mg, Yield: 25%, column chromatography eluent, EtOAc/PE = 1:40 → 1:30;

**<sup>1</sup>H NMR** (400 MHz, CDCl<sub>3</sub>) δ 8.02 (d, *J* = 8.1 Hz, 1H), 7.68 – 7.56 (m, 5H), 7.39 – 7.32 (m, 1H), 7.31 – 7.25 (m, 1H), 6.35 (s, 1H), 5.92 (s, 1H), 3.75 (s, 3H), 1.85 (s, 3H), 1.45 (s, 3H). **<sup>13</sup>C NMR** (100 MHz, CDCl<sub>3</sub>) δ 151.1, 143.9, 141.5, 139.6, 132.4, 130.8, 130.6 (q, *J*<sub>C-F</sub> = 32.5 Hz), 127.9, 125.6 (q, *J*<sub>C-F</sub> = 3.5 Hz), 124.1, 123.3, 123.8 (q, *J*<sub>C-F</sub> = 270.5 Hz), 122.6, 121.3, 113.0, 99.6, 69.2, 65.6, 26.6, 20.5. **<sup>19</sup>F NMR**

(376 MHz, CDCl<sub>3</sub>)  $\delta$  -62.59. HRMS (ESI)  $m/z$  calcd for C<sub>22</sub>H<sub>19</sub>F<sub>3</sub>N<sub>2</sub>O<sub>2</sub> [M + Na]<sup>+</sup> 423.1291, found 423.1292.

**2-Methoxy-1-(2-methylprop-1-en-1-yl)-1-(m-tolyl)-1,2-dihydro-3H-imidazo[1,5-a]indol-3-one (3ai)**

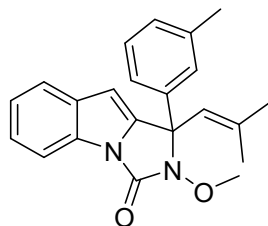

Yellow oil. 44.3 mg, Yield: 64%, column chromatography eluent, EtOAc/PE = 1:40 → 1:30;

<sup>1</sup>H NMR (400 MHz, CDCl<sub>3</sub>)  $\delta$  8.02 (d,  $J$  = 8.1 Hz, 1H), 7.57 (d,  $J$  = 7.7 Hz, 1H), 7.35 – 7.27 (m, 3H), 7.27-7.22 (m, 2H), 7.13 (d,  $J$  = 7.5 Hz, 1H), 6.33 (s, 1H), 5.91 (s, 1H), 3.71 (s, 3H), 2.33 (s, 3H), 1.82 (s, 3H), 1.46 (s, 3H). <sup>13</sup>C NMR (100 MHz, CDCl<sub>3</sub>)  $\delta$  151.0, 140.5, 140.4, 139.5, 138.3, 132.5, 130.7, 129.1, 128.4, 127.8, 124.6, 123.6, 123.2, 123.0, 121.1, 112.9, 99.1, 69.5, 65.4, 26.5, 21.5, 20.3. HRMS (ESI)  $m/z$  calcd for C<sub>22</sub>H<sub>22</sub>N<sub>2</sub>O<sub>2</sub> [M + Na]<sup>+</sup> 369.1573, found 369.1572.

**1-(3-Fluorophenyl)-2-methoxy-1-(2-methylprop-1-en-1-yl)-1,2-dihydro-3H-imidazo[1,5-a]indol-3-one (3aj)**

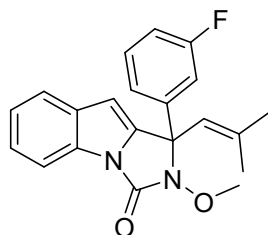

White solid. 34.3 mg, Yield: 49%, mp 131-133 °C. column chromatography eluent, EtOAc/PE = 1:40 → 1:30;

<sup>1</sup>H NMR (400 MHz, CDCl<sub>3</sub>)  $\delta$  7.97 (d,  $J$  = 8.0 Hz, 1H), 7.54 (d,  $J$  = 7.6 Hz, 1H), 7.32 – 7.16 (m, 5H), 7.01 (d,  $J$  = 8.7 Hz, 1H), 6.31 (s, 1H), 5.86 (s, 1H), 3.70 (s, 3H), 1.79 (s, 3H), 1.43 (s, 3H). <sup>13</sup>C NMR (100 MHz, CDCl<sub>3</sub>)  $\delta$  162.8 (d,  $J_{C-F}$  = 245.0 Hz), 151.0, 142.3 (d,  $J_{C-F}$  = 27.2 Hz), 141.1, 139.7, 132.4, 130.7, 130.1 (d,  $J_{C-F}$  = 8.1 Hz), 123.9, 123.2, 123.0 (d,  $J_{C-F}$  = 2.9 Hz), 122.8, 121.3, 115.4 (d,  $J_{C-F}$  = 21.0 Hz), 114.7 (d,  $J_{C-F}$  = 23.0 Hz), 113.0, 99.5, 69.1, 65.5, 26.5, 20.4. <sup>19</sup>F NMR (376 MHz, CDCl<sub>3</sub>)  $\delta$  -111.9. HRMS (ESI)  $m/z$  calcd for C<sub>21</sub>H<sub>19</sub>FN<sub>2</sub>O<sub>2</sub> [M + H]<sup>+</sup> 351.1503, found 351.1501.

**1-(3-chlorophenyl)-2-methoxy-1-(2-methylprop-1-en-1-yl)-1,2-dihydro-3H-imidazo[1,5-a]indol-3-one (3ak)**

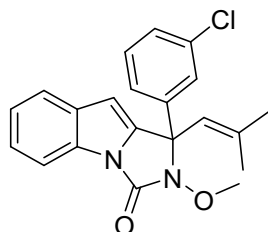

Yellow oil. 27.9 mg, Yield: 38%, column chromatography eluent, EtOAc/PE = 1:40 → 1:30;

<sup>1</sup>H NMR (400 MHz, CDCl<sub>3</sub>)  $\delta$  8.01 (d,  $J$  = 8.1 Hz, 1H), 7.58 (d,  $J$  = 8.0 Hz, 1H), 7.51 (s, 1H), 7.43 – 7.37 (m, 1H), 7.36 – 7.24 (m, 4H), 6.35 (s, 1H), 5.89 (s, 1H), 3.74 (s, 3H), 1.83 (s, 3H), 1.46 (s, 3H). <sup>13</sup>C NMR (100 MHz, CDCl<sub>3</sub>)  $\delta$  151.1, 142.0, 141.3, 139.6, 134.7, 132.5, 130.8, 130.0, 128.7, 127.7,

125.7, 124.0, 123.3, 122.8, 121.4, 113.1, 99.7, 69.2, 65.6, 26.6, 20.5. HRMS (ESI)  $m/z$  calcd for  $C_{21}H_{19}ClN_2O_2$   $[M + H]^+$  367.1208, found 367.1206.

**1-(2-Fluorophenyl)-2-methoxy-1-(2-methylprop-1-en-1-yl)-1,2-dihydro-3H-imidazo[1,5-a]indol-3-one (3al)**

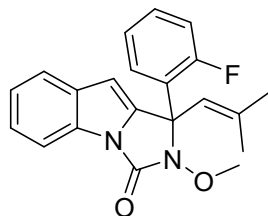

Yellow solid. 30.8 mg, Yield: 44%, mp 147-148 °C. column chromatography eluent, EtOAc/PE = 1:40 → 1:30;

$^1H$  NMR (400 MHz,  $CDCl_3$ )  $\delta$  7.99 (d,  $J = 7.9$  Hz, 1H), 7.55 (d,  $J = 7.9$  Hz, 1H), 7.47 (t,  $J = 8.1$  Hz, 1H), 7.34 – 7.27 (m, 2H), 7.25 – 7.20 (m, 1H), 7.12 – 7.03 (m, 2H), 6.43 (s, 1H), 5.86 (s, 1H), 3.89 (s, 3H), 1.83 (s, 3H), 1.47 (s, 3H).  $^{13}C$  NMR (100 MHz,  $CDCl_3$ )  $\delta$  160.8 (d,  $J_{C-F} = 249.0$  Hz), 150.7, 140.3, 139.5, 132.4, 130.7, 130.3 (d,  $J_{C-F} = 8.4$  Hz), 128.4 (d,  $J_{C-F} = 2.3$  Hz), 127.7 (d,  $J_{C-F} = 10.3$  Hz), 124.1 (d,  $J_{C-F} = 3.4$  Hz), 123.7, 123.0, 122.1, 121.2, 116.5 (d,  $J_{C-F} = 22.0$  Hz), 112.8, 99.2 (d,  $J_{C-F} = 3.9$  Hz), 67.1, 65.4, 26.7, 19.7.  $^{19}F$  NMR (376 MHz,  $CDCl_3$ )  $\delta$  -108.7. HRMS (ESI)  $m/z$  calcd for  $C_{21}H_{19}FN_2O_2$   $[M + H]^+$  351.1503, found 351.1505.

**1-(2-Chlorophenyl)-2-methoxy-1-(2-methylprop-1-en-1-yl)-1,2-dihydro-3H-imidazo[1,5-a]indol-3-one (3am)**

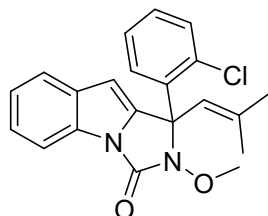

Yellow solid. 25.7 mg, Yield: 35%, mp 144-146 °C. column chromatography eluent, EtOAc/PE = 1:40 → 1:30;

$^1H$  NMR (400 MHz,  $CDCl_3$ )  $\delta$  8.00 (d,  $J = 8.0$  Hz, 1H), 7.71 – 7.66 (m, 1H), 7.54 (d,  $J = 7.8$  Hz, 1H), 7.41 – 7.36 (m, 1H), 7.32 – 7.20 (m, 4H), 6.51 (s, 1H), 5.85 (s, 1H), 3.79 (s, 3H), 1.84 (s, 3H), 1.50 (s, 3H).  $^{13}C$  NMR (100 MHz,  $CDCl_3$ )  $\delta$  150.7, 140.2, 138.9, 136.0, 133.7, 132.2, 131.8, 130.8, 129.6, 129.4, 126.9, 123.7, 123.0, 121.4, 121.3, 112.8, 99.7, 68.9, 65.2, 26.5, 20.1. HRMS (ESI)  $m/z$  calcd for  $C_{21}H_{19}ClN_2O_2$   $[M + H]^+$  367.1208, found 367.1208.

**2-Methoxy-1-(2-methoxyphenyl)-1-(2-methylprop-1-en-1-yl)-1,2-dihydro-3H-imidazo[1,5-a]indol-3-one (3an)**

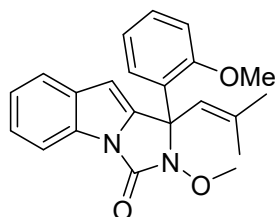



White solid. 27.6 mg, Yield: 38%, mp 155-156 °C. column chromatography eluent, EtOAc/PE = 1:40 → 1:20;

<sup>1</sup>H NMR (400 MHz, CDCl<sub>3</sub>) δ 8.00 (d, *J* = 7.8 Hz, 1H), 7.55 (d, *J* = 7.6 Hz, 1H), 7.51 (d, *J* = 7.6 Hz, 1H), 7.33 – 7.23(m, 2H), 7.23 – 7.17 (m, 1H), 6.98 – 6.91 (m, 1H), 6.87 (d, *J* = 8.0 Hz, 1H), 6.32 (s, 1H), 5.81 (s, 1H), 3.80 (s, 3H), 3.64 (s, 3H), 1.83 (s, 3H), 1.50 (s, 3H). <sup>13</sup>C NMR (100 MHz, CDCl<sub>3</sub>) δ 157.8, 150.8, 140.9, 138.9, 132.4, 130.6, 129.7, 128.3, 127.5, 123.1, 122.8, 122.6, 120.9, 120.4, 112.6, 112.1, 98.1, 67.9, 65.1, 55.5, 26.6, 20.1. HRMS (ESI) *m/z* calcd for C<sub>22</sub>H<sub>22</sub>N<sub>2</sub>O<sub>3</sub> [M + H]<sup>+</sup> 363.1703, found 363.1700.

**1-Butyl-2-methoxy-1-(2-methylprop-1-en-1-yl)-1,2-dihydro-3H-imidazo[1,5-a]indol-3-one (3ao)**

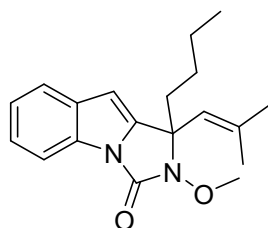

Yellow solid. 40.6 mg, Yield: 65%, mp 101-102 °C. column chromatography eluent, EtOAc/PE = 1:40 → 1:30;

<sup>1</sup>H NMR (400 MHz, CDCl<sub>3</sub>) δ 8.01 (d, *J* = 7.4 Hz, 1H), 7.56 (d, *J* = 7.5 Hz, 1H), 7.34 – 7.19 (m, 2H), 6.23 (s, 1H), 5.46 (s, 1H), 3.94 (s, 3H), 2.12 – 1.94 (m, 2H), 1.76 (s, 3H), 1.30 – 1.17 (m, 6H), 0.90 – 0.75 (m, 4H). <sup>13</sup>C NMR (100 MHz, CDCl<sub>3</sub>) δ 151.9, 141.7, 140.1, 132.7, 130.6, 123.4, 123.3, 122.9, 121.1, 113.0, 97.7, 65.9, 65.4, 39.5, 26.9, 25.1, 22.5, 18.9, 13.9. HRMS (ESI) *m/z* calcd for C<sub>19</sub>H<sub>24</sub>N<sub>2</sub>O<sub>2</sub> [M + H]<sup>+</sup> 313.1911, found 313.1911.

**1-(Cyclopentylidenemethyl)-2-methoxy-1-phenyl-1,2-dihydro-3H-imidazo[1,5-a]indol-3-one (3ap)**

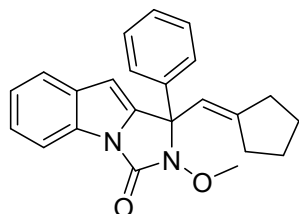

Yellow oil. 32.3 mg, Yield: 45%, column chromatography eluent, EtOAc/PE = 1:40 → 1:30;

<sup>1</sup>H NMR (400 MHz, CDCl<sub>3</sub>) δ 8.08 (d, *J* = 8.0 Hz, 1H), 7.64 – 7.55 (m, 3H), 7.44 – 7.34 (m, 4H), 7.30 (d, *J* = 8.1 Hz, 1H), 6.34 (s, 1H), 6.09 (s, 1H), 3.80 (s, 3H), 2.46 (d, *J* = 7.2 Hz, 2H), 2.01 (d, *J* = 16.9, 1H), 1.76 (d, *J* = 17.2 Hz, 1H), 1.60 (m, 4H). <sup>13</sup>C NMR (100 MHz, CDCl<sub>3</sub>) δ 152.1, 151.3, 140.0, 139.7, 132.6, 130.8, 128.7, 128.4, 127.4, 123.7, 123.1, 121.3, 118.2, 113.1, 99.6, 69.8, 65.4, 35.6, 29.7, 26.9, 25.6. HRMS (ESI) *m/z* calcd for C<sub>23</sub>H<sub>22</sub>N<sub>2</sub>O<sub>2</sub> [M + H]<sup>+</sup> 359.1754, found 359.1753.

**1-Cyclopropyl-2-methoxy-1-(2-methylprop-1-en-1-yl)-1,2-dihydro-3H-imidazo[1,5-a]indol-3-one (3aq)**

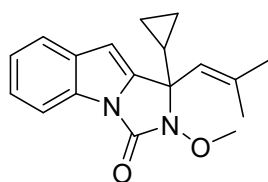

Yellow oil. 36.8 mg, Yield: 62%, column chromatography eluent, EtOAc/PE = 1:40 → 1:30;  
**<sup>1</sup>H NMR** (400 MHz, CDCl<sub>3</sub>) δ 7.99 (d, *J* = 8.1 Hz, 1H), 7.54 (d, *J* = 7.8 Hz, 1H), 7.29 (t, *J* = 7.6 Hz, 1H), 7.23 (t, *J* = 7.6 Hz, 1H), 6.17 (s, 1H), 5.65 (s, 1H), 3.99 (s, 3H), 1.78 (s, 4H), 1.28 (s, 3H), 0.73 – 0.62 (m, 1H), 0.6–0.51 (m, 1H), 0.41 – 0.32 (m, 1H), -0.26 – -0.35 (m, 1H). **<sup>13</sup>C NMR** (100 MHz, CDCl<sub>3</sub>) δ 151.4, 141.4, 136.4, 132.1, 130.6, 123.4, 123.1, 122.8, 121.0, 112.8, 99.3, 67.5, 65.3, 26.7, 19.0, 18.1, 1.6, 1.1. HRMS (ESI) *m/z* calcd for C<sub>18</sub>H<sub>20</sub>N<sub>2</sub>O<sub>2</sub> [M + H]<sup>+</sup> 297.1598, found 297.1597.

**N-methoxy-2-(3-methyl-1-phenyl-2λ<sup>5</sup>-buta-1,2-dien-1-yl)-1H-indole-1-carboxamide (4aa)**

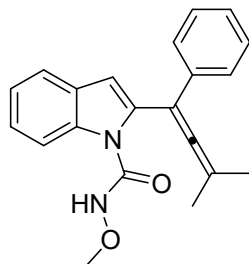

Yellow oil. column chromatography eluent, EtOAc/PE = 1:40 → 1:5;  
**<sup>1</sup>H NMR** (400 MHz, CDCl<sub>3</sub>) δ 8.65 (s, 1H), 8.14 (d, *J* = 7.8 Hz, 1H), 7.55 (d, *J* = 7.8 Hz, 1H), 7.34 – 7.22 (m, 7H), 6.60 (s, 1H), 3.48 (s, 3H), 1.92 (s, 6H). **<sup>13</sup>C NMR** (100 MHz, CDCl<sub>3</sub>) δ 203.8, 151.9, 137.4, 136.1, 132.8, 128.9, 128.7, 127.7, 126.6, 124.4, 122.8, 120.4, 114.6, 110.4, 100.6, 99.7, 64.2, 20.2. HRMS (ESI) *m/z* calcd for C<sub>21</sub>H<sub>20</sub>N<sub>2</sub>O<sub>2</sub> [M + H]<sup>+</sup> 333.1598, found 333.1598.

**N-methoxy-3-methyl-2-(3-methyl-1-phenyl-2λ<sup>5</sup>-buta-1,2-dien-1-yl)-1H-indole-1-carboxamide (4ba)**

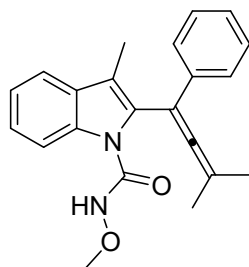

Yellow oil. 54.7 mg, Yield: 79%, column chromatography eluent, EtOAc/PE = 1:40 → 1:30;  
**<sup>1</sup>H NMR** (400 MHz, CDCl<sub>3</sub>) δ 8.78 (s, 1H), 8.23 (d, *J* = 7.4, 1H), 7.54 (d, *J* = 6.1, 1H), 7.36 – 7.26 (m, 4H), 7.25 – 7.19 (m, 3H), 3.46 (s, 3H), 2.24 (m, 3H), 1.94 (s, 6H). **<sup>13</sup>C NMR** (100 MHz, CDCl<sub>3</sub>) δ 204.3, 152.3, 136.7, 135.9, 129.8, 129.0, 127.9, 127.7, 126.2, 124.8, 122.5, 118.8, 117.6, 115.1, 99.9, 98.4, 64.2, 19.9, 9.4. HRMS (ESI) *m/z* calcd for C<sub>22</sub>H<sub>22</sub>N<sub>2</sub>O<sub>2</sub> [M + H]<sup>+</sup> 347.1754, found 347.1751.

**1-(2-Methylprop-1-en-1-yl)-1-phenyl-1,2-dihydro-3H-imidazo[1,5-*a*]indol-3-one (5)**

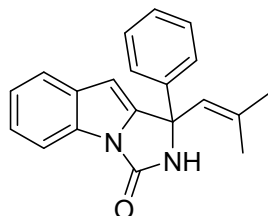

White solid. 49.0 mg, Yield: 81%, mp 226–227 °C. column chromatography eluent, EtOAc/PE = 1:30 → 1:5;  
**<sup>1</sup>H NMR** (400 MHz, CDCl<sub>3</sub>) δ 7.97 (d, *J* = 7.8, 1H), 7.56 – 7.49 (m, 3H), 7.37 – 7.31 (m, 2H), 7.30 – 7.20 (m, 3H), 6.71 (s, 1H), 6.33 (s, 1H), 5.88 (s, 1H), 1.79 (s, 3H), 1.44 (s, 3H). **<sup>13</sup>C NMR** (100 MHz,

CDCl<sub>3</sub>)  $\delta$  152.4, 145.3, 143.2, 140.0, 133.5, 130.0, 128.9, 127.8, 126.8, 125.5, 123.3, 122.7, 121.0, 112.7, 97.7, 63.6, 26.7, 19.4. HRMS (ESI)  $m/z$  calcd for C<sub>20</sub>H<sub>18</sub>N<sub>2</sub>O [M + H]<sup>+</sup> 303,1492, found 303,1489.

### 1-(2-Methylprop-1-en-1-yl)-1-phenyl-1,2-dihydro-3H-imidazo[1,5-a]indole-3-thione (6)

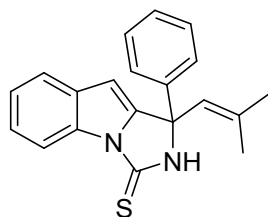

White solid. 30.7 mg, Yield: 96%, mp 230-231 °C. column chromatography eluent, EtOAc/PE = 1:20 → 1:10;

<sup>1</sup>H NMR (400 MHz, DMSO-*d*<sub>6</sub>)  $\delta$  11.24 (s, 1H), 8.58 (d,  $J$  = 8.0 Hz, 1H), 7.64 (d,  $J$  = 7.8 Hz, 1H), 7.55 – 7.49 (m, 2H), 7.41 (t,  $J$  = 7.7 Hz, 2H), 7.36 – 7.25 (m, 3H), 6.67 (s, 1H), 5.75 (s, 1H), 1.76 (s, 3H), 1.32 (s, 3H). <sup>13</sup>C NMR (100 MHz, DMSO-*d*<sub>6</sub>)  $\delta$  173.5, 145.3, 142.2, 139.6, 133.6, 130.4, 128.9, 127.9, 125.5, 125.3, 123.4, 123.2, 121.4, 112.6, 98.0, 67.0, 26.6, 18.7. HRMS (ESI)  $m/z$  calcd for C<sub>20</sub>H<sub>18</sub>N<sub>2</sub>S [M + H]<sup>+</sup> 319.1263, found 319.1263.

### 10. NMR spectra of products

<sup>1</sup>H NMR spectrum of **3aa**

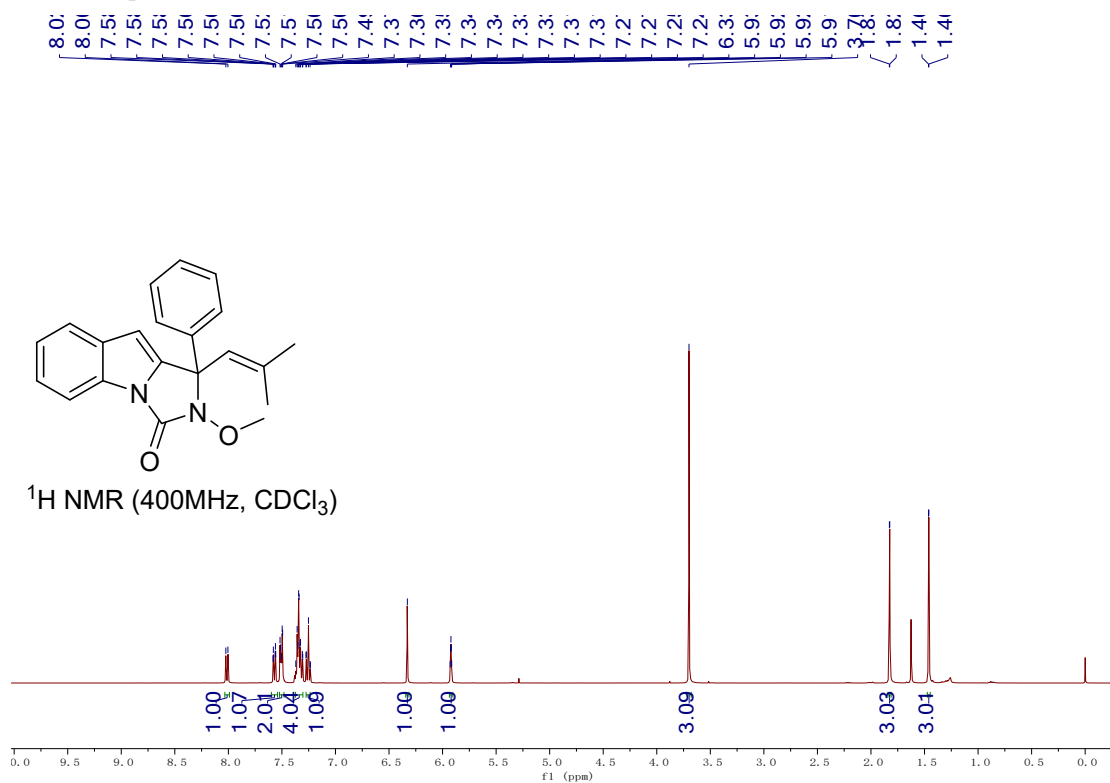

<sup>13</sup>C NMR spectrum of **3aa**

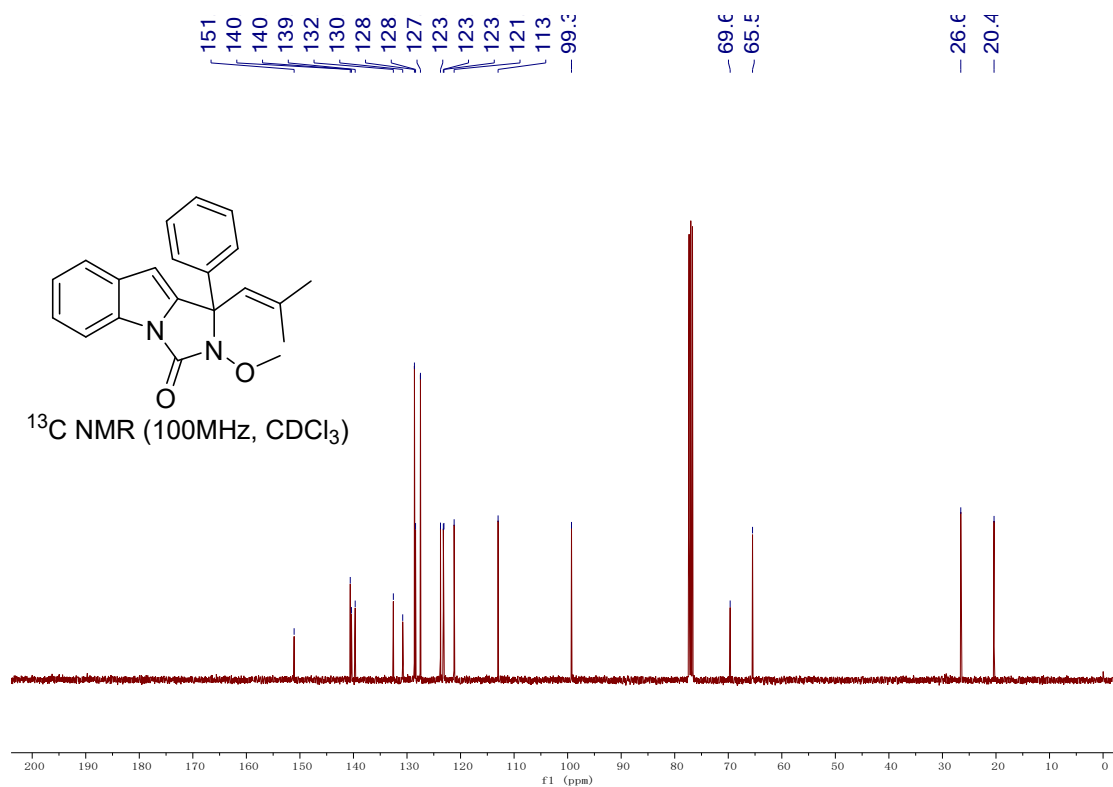

$^1\text{H}$  NMR spectrum of **3ba**

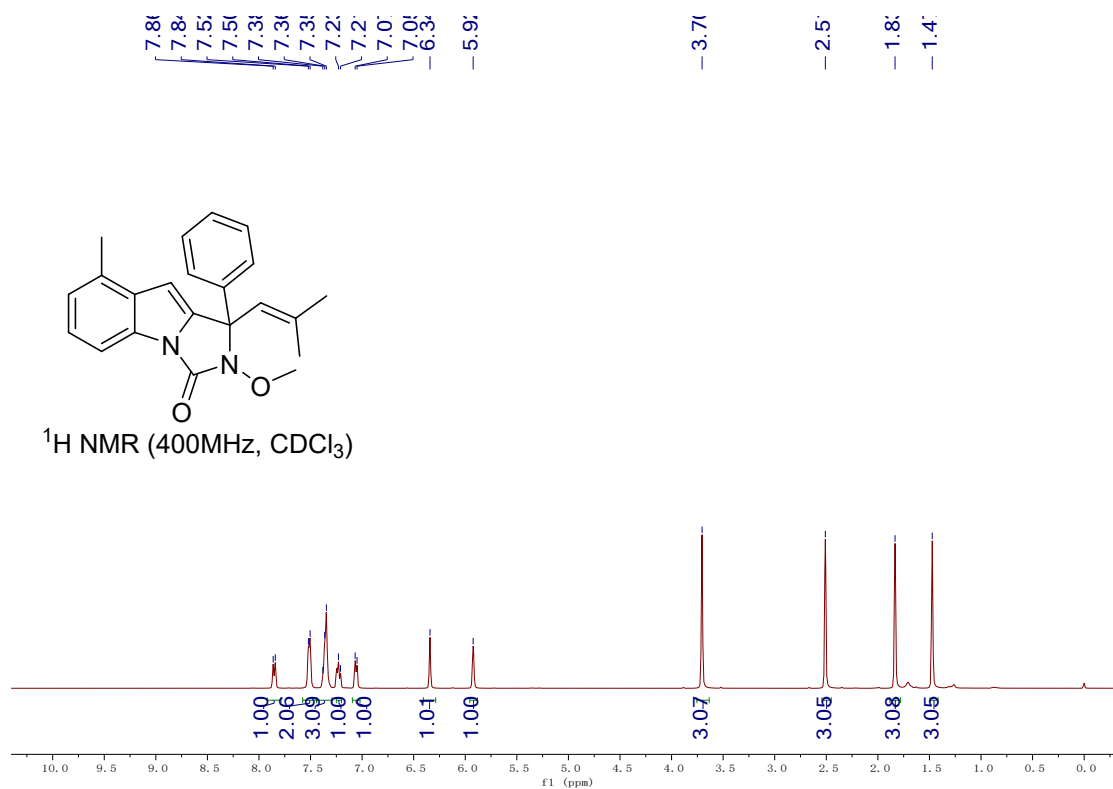

<sup>13</sup>C NMR spectrum of **3ba**

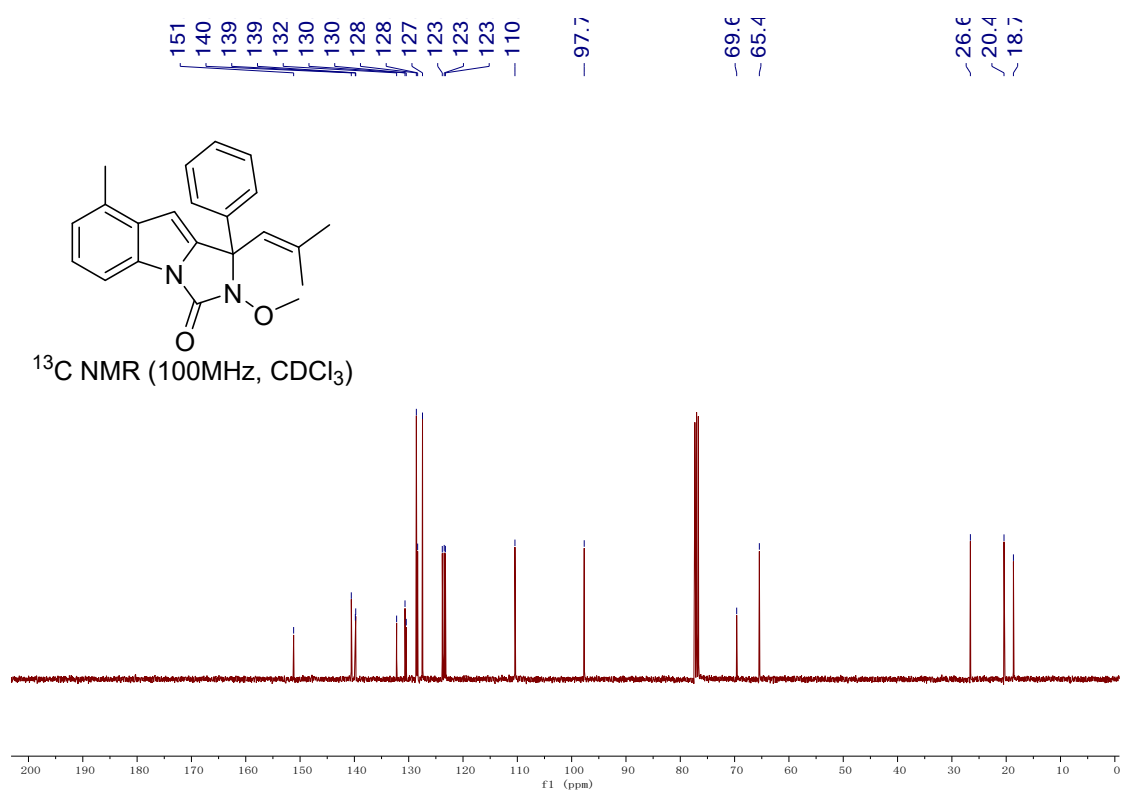

<sup>1</sup>H NMR spectrum of **3ca**

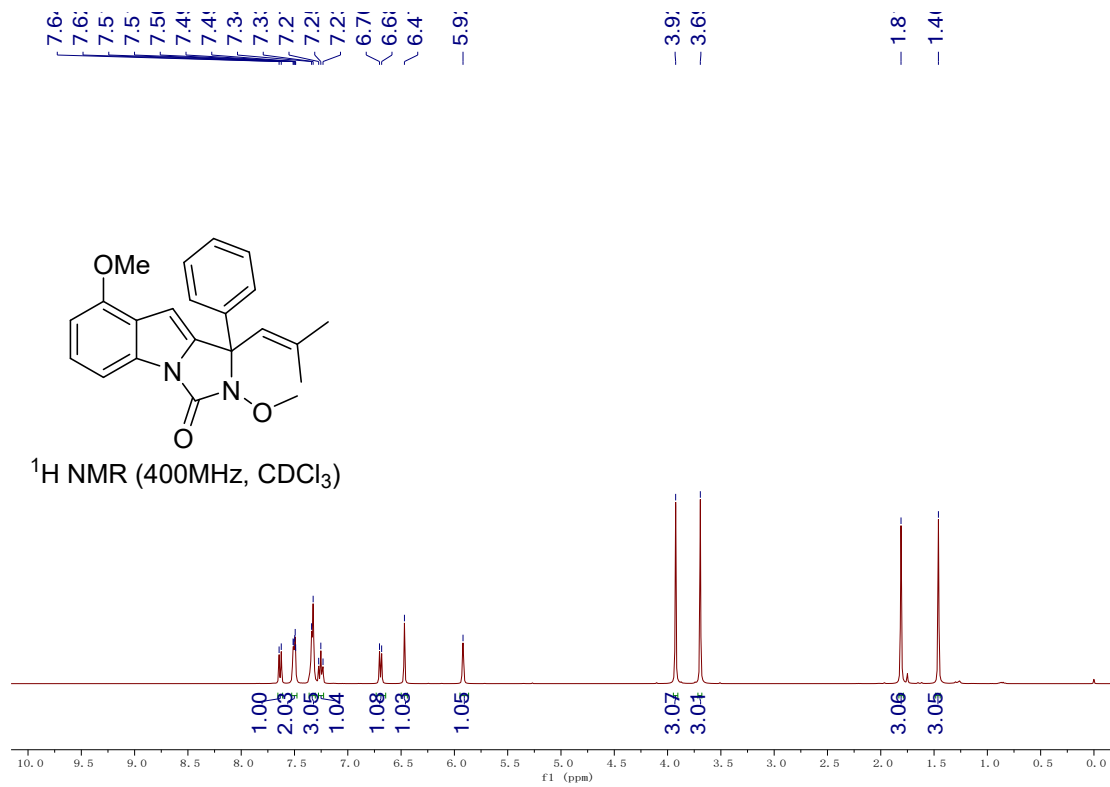

<sup>13</sup>C NMR spectrum of **3ca**

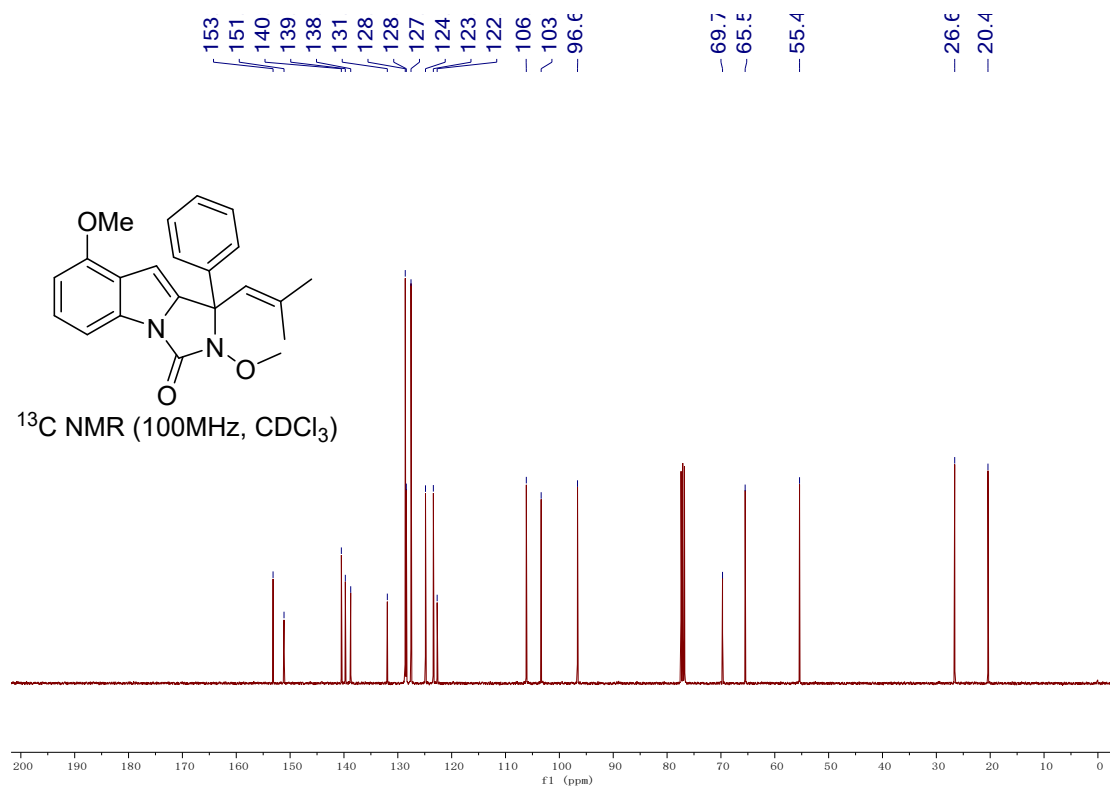

<sup>1</sup>H NMR spectrum of **3da**

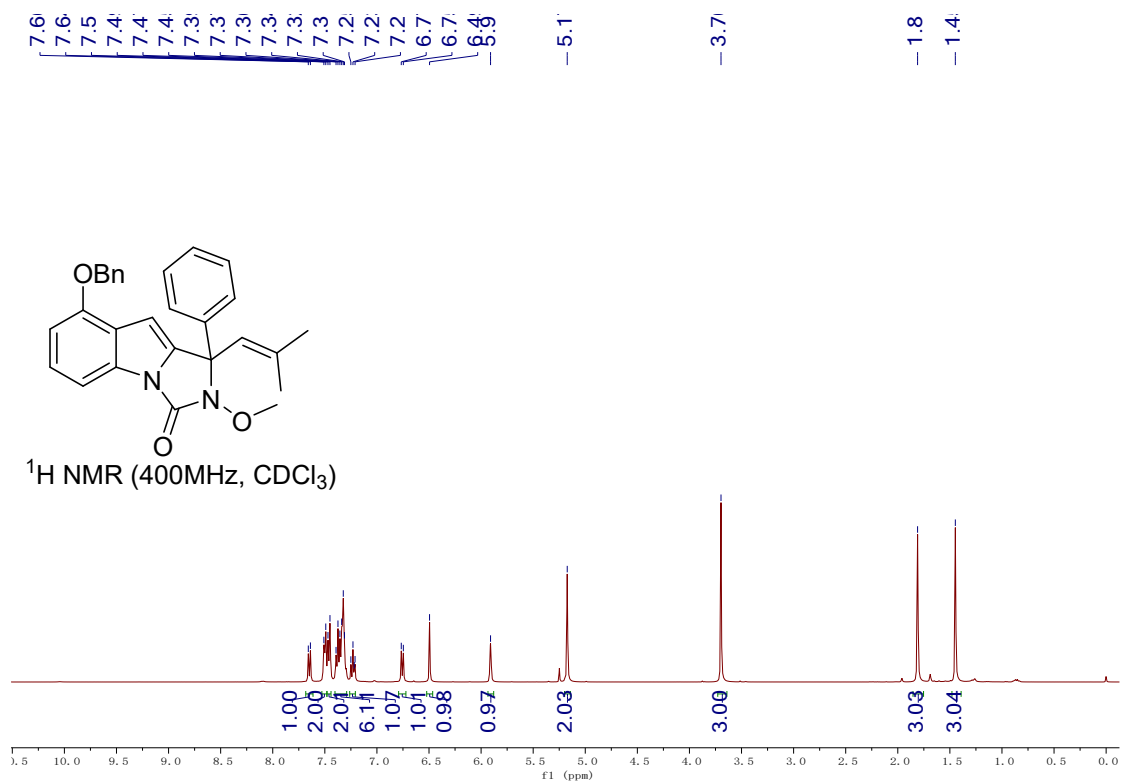

<sup>13</sup>C NMR spectrum of **3da**

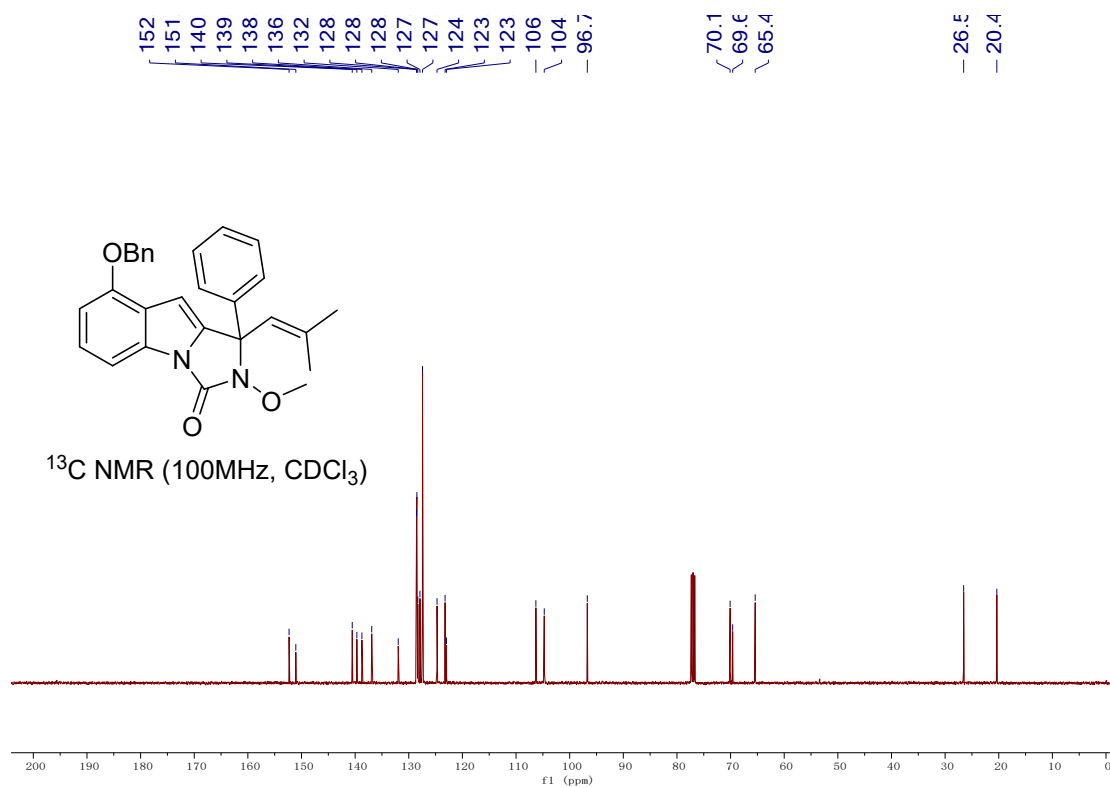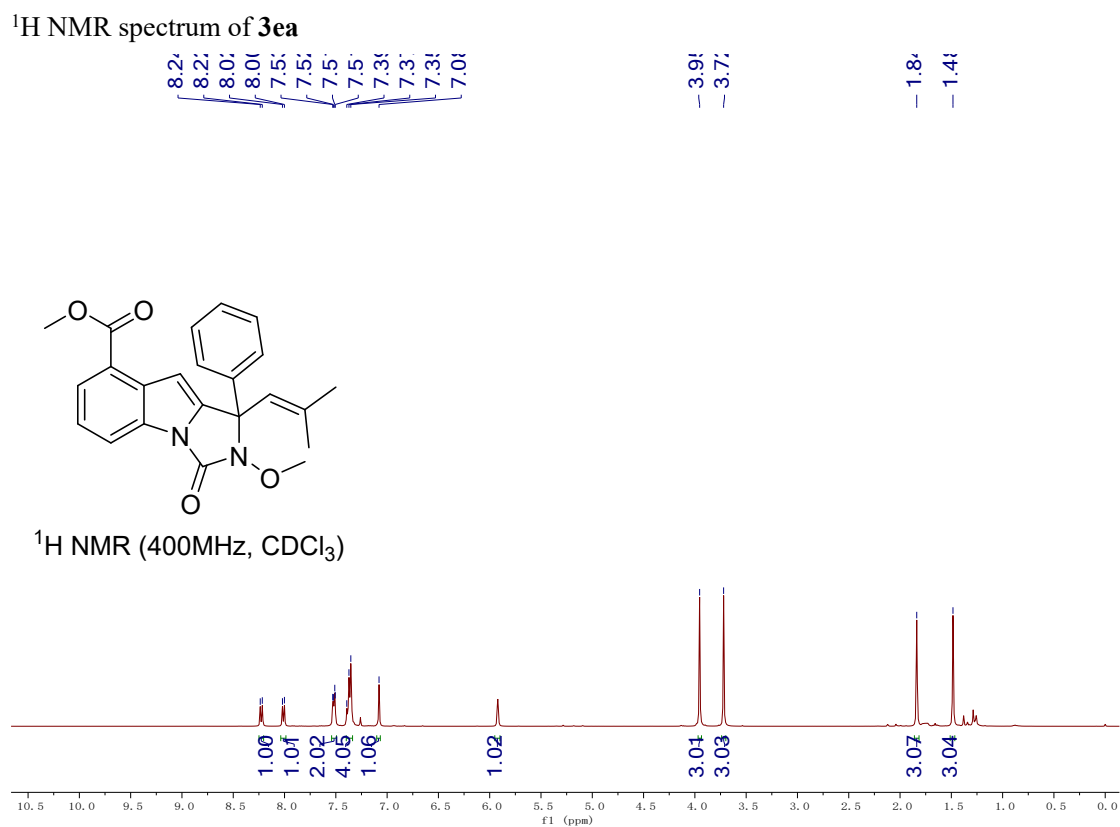



<sup>13</sup>C NMR spectrum of **3ea**

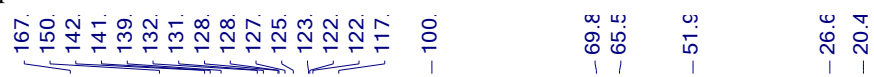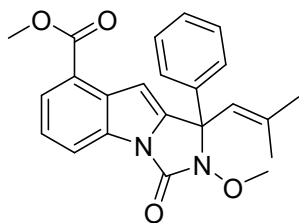

<sup>13</sup>C NMR (100MHz, CDCl<sub>3</sub>)

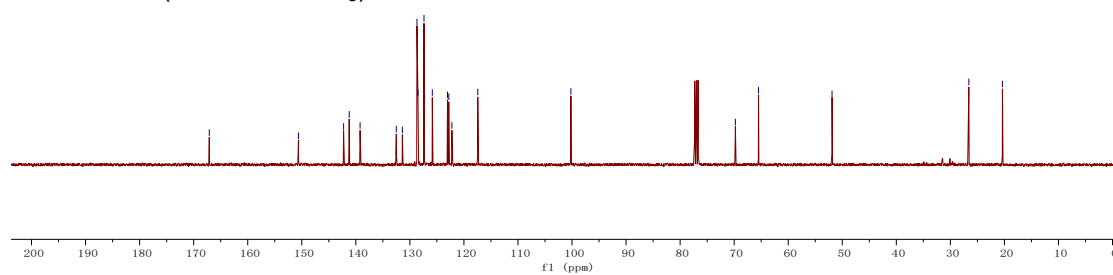

<sup>1</sup>H NMR spectrum of **3fa**

7.9  
7.9  
7.5  
7.5  
7.4  
7.3  
7.3  
7.2  
7.2  
6.4  
-5.9  
-3.7  
-1.8  
-1.4

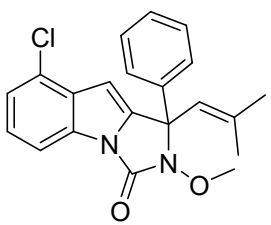

<sup>1</sup>H NMR (400MHz, CDCl<sub>3</sub>)

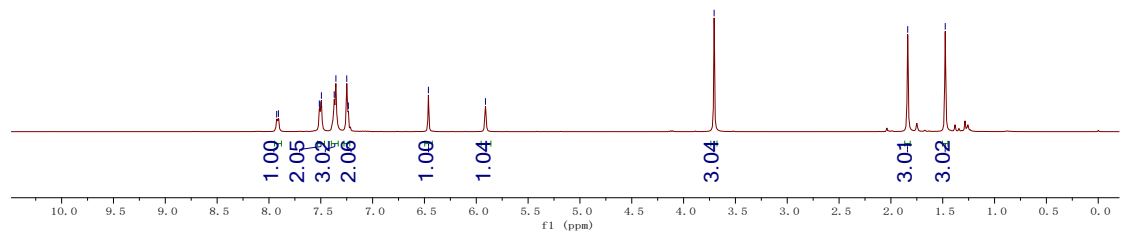

<sup>13</sup>C NMR spectrum of 3fa

150  
141  
140  
139  
131  
131  
128  
128  
127  
126  
124  
122  
122  
111  
-97.5  
-69.7  
-65.5  
-26.6  
-20.4

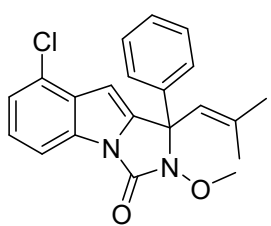

<sup>13</sup>C NMR (100MHz, CDCl<sub>3</sub>)

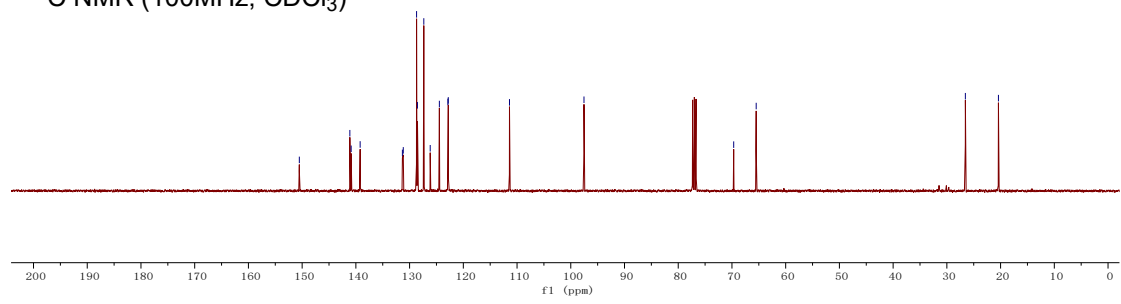

<sup>1</sup>H NMR spectrum of **3ga**

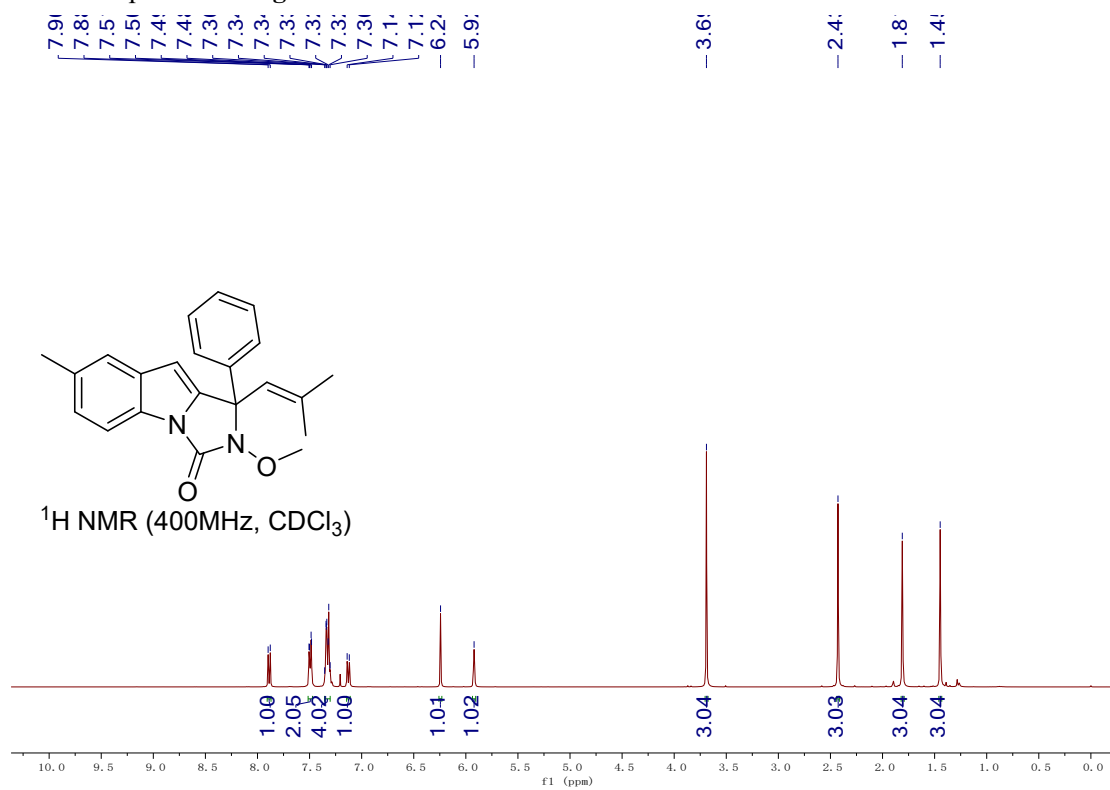

<sup>13</sup>C NMR spectrum of **3ga**

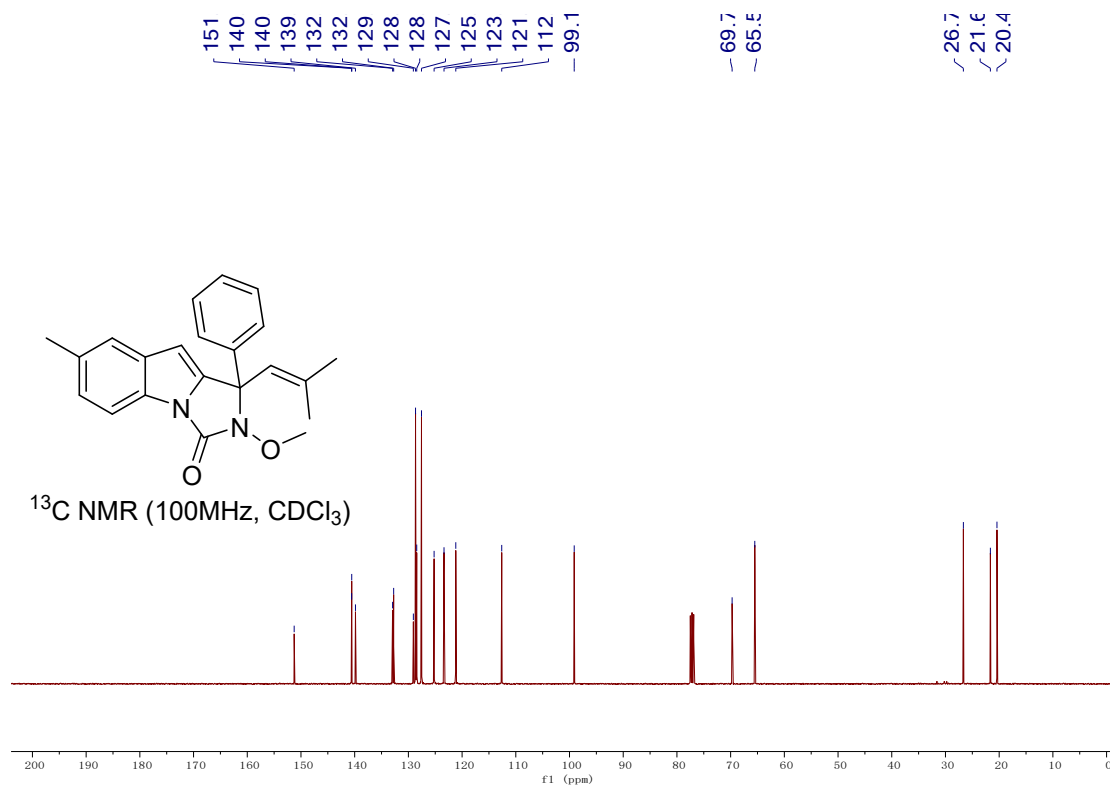

<sup>1</sup>H NMR spectrum of **3ha**

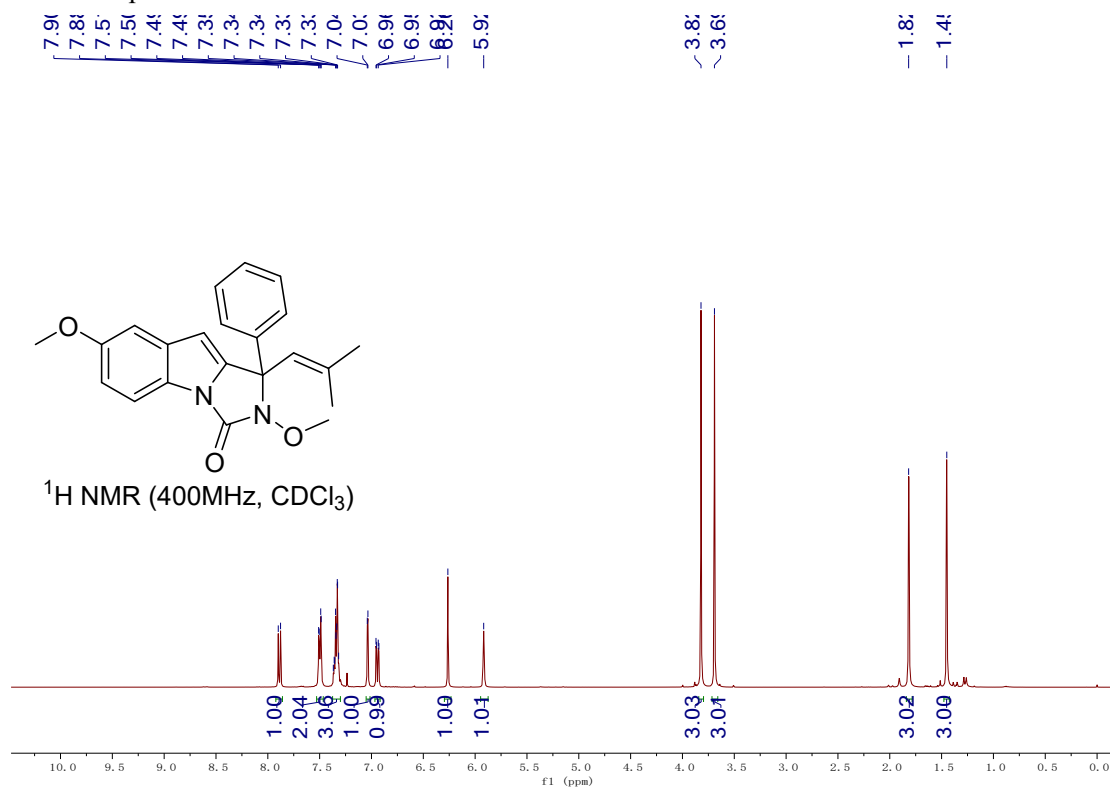

<sup>13</sup>C NMR spectrum of **3ha**

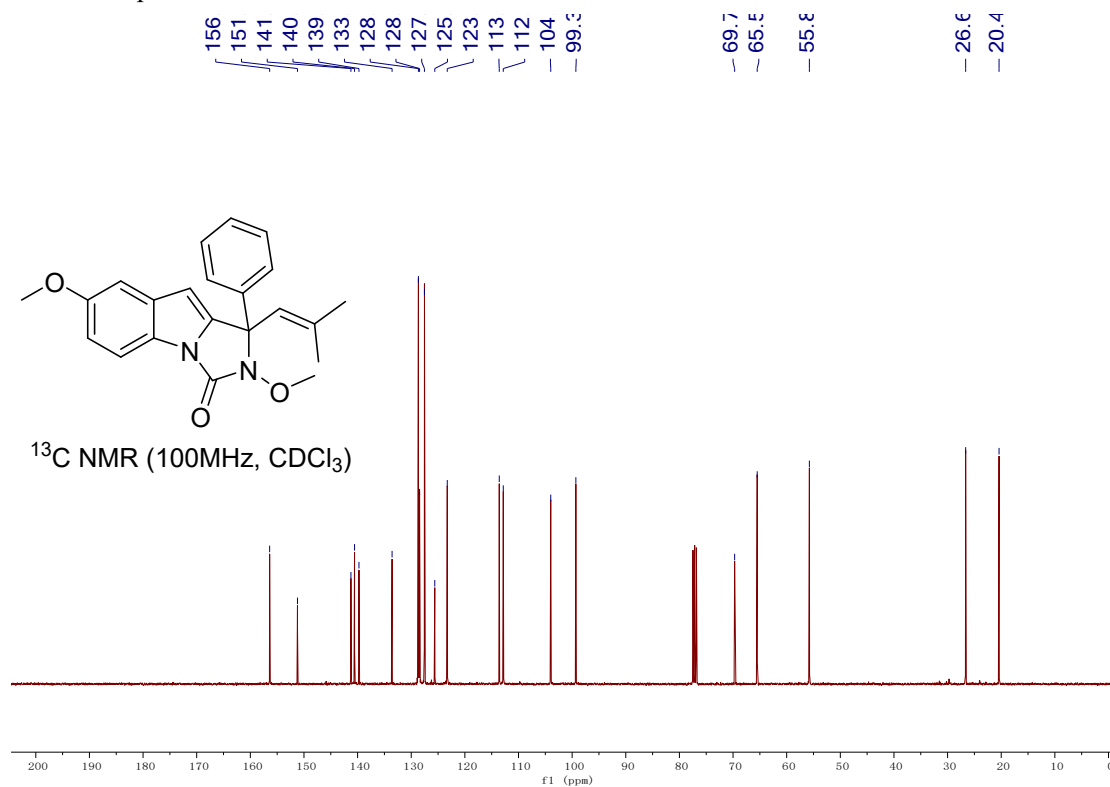

<sup>1</sup>H NMR spectrum of **3ia**

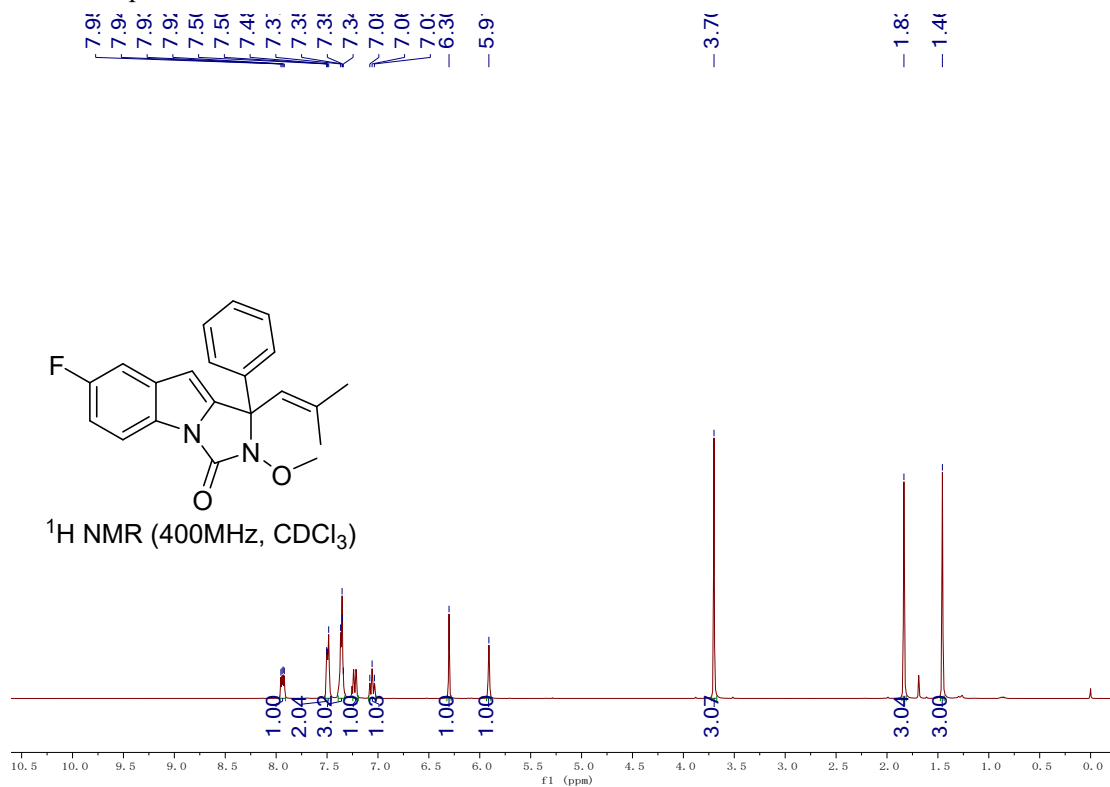

<sup>13</sup>C NMR spectrum of **3ia**

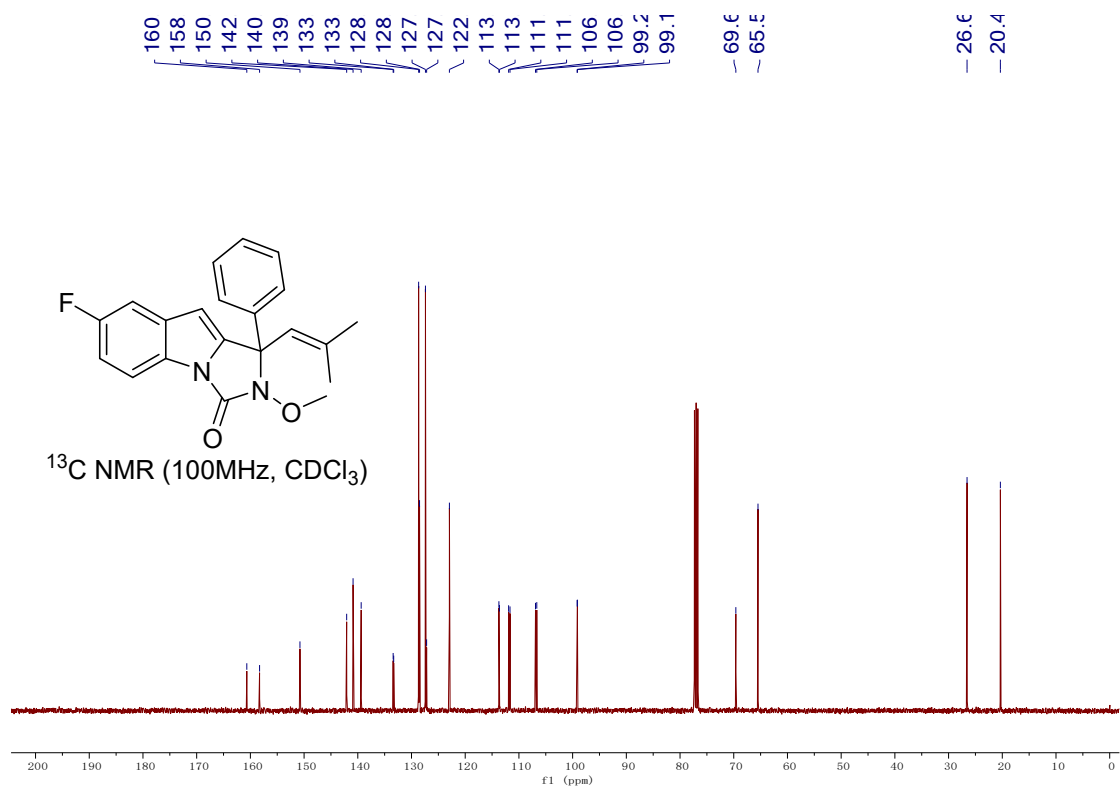

**<sup>19</sup>F NMR spectrum of **3ia****

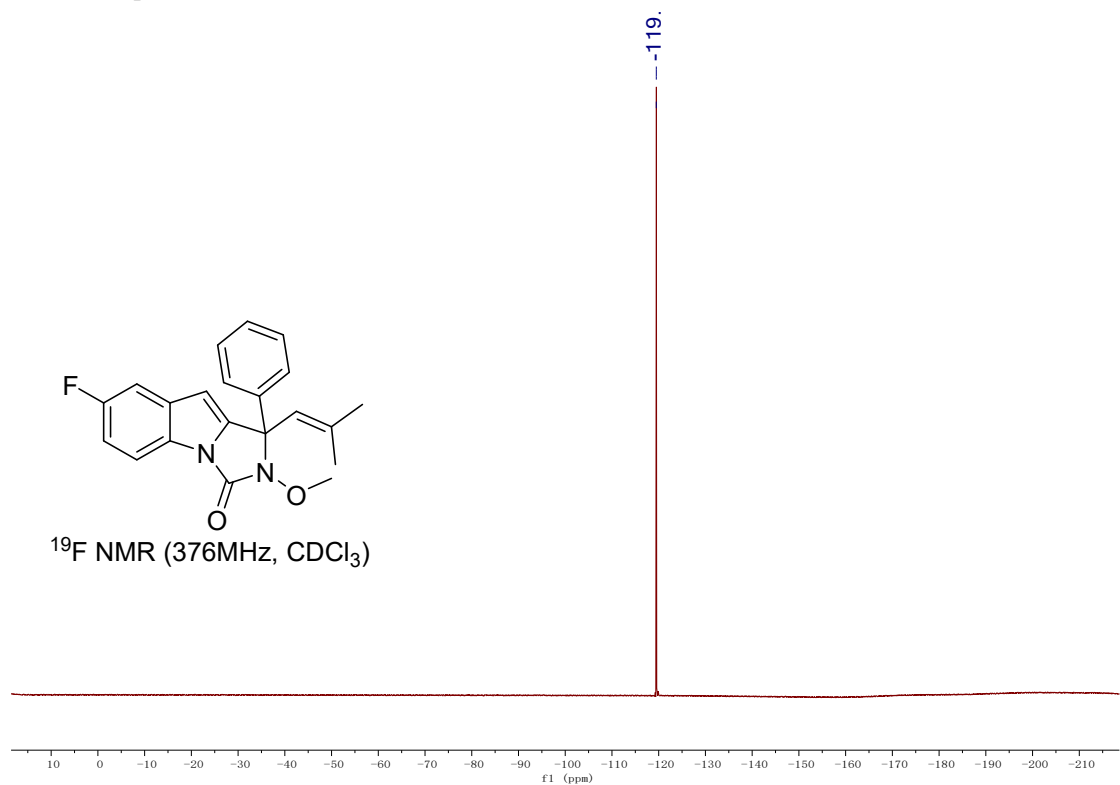

<sup>1</sup>H NMR spectrum of **3ja**

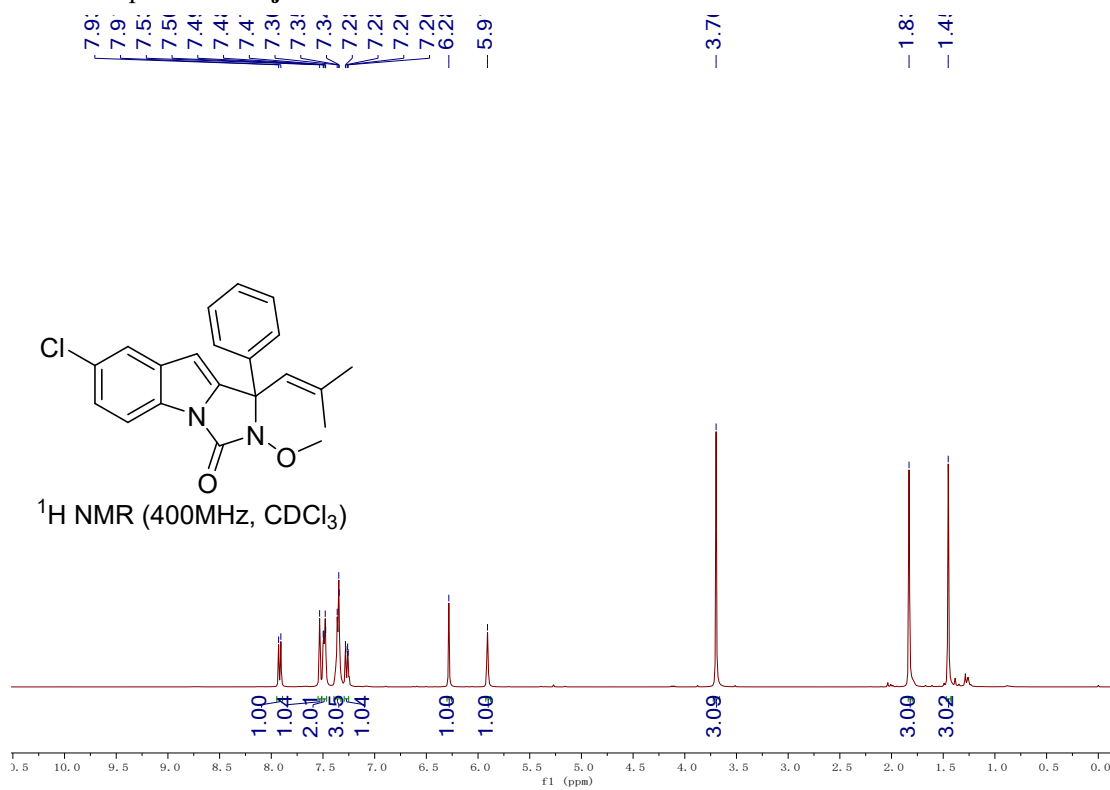

<sup>13</sup>C NMR spectrum of **3ja**

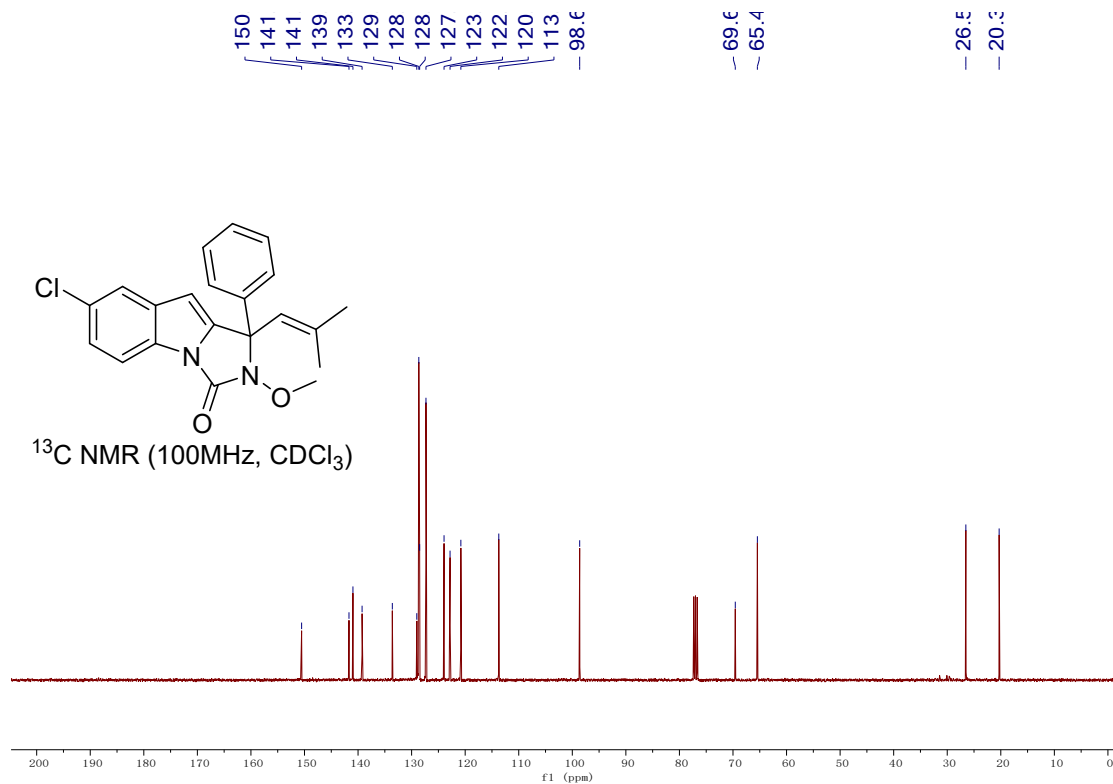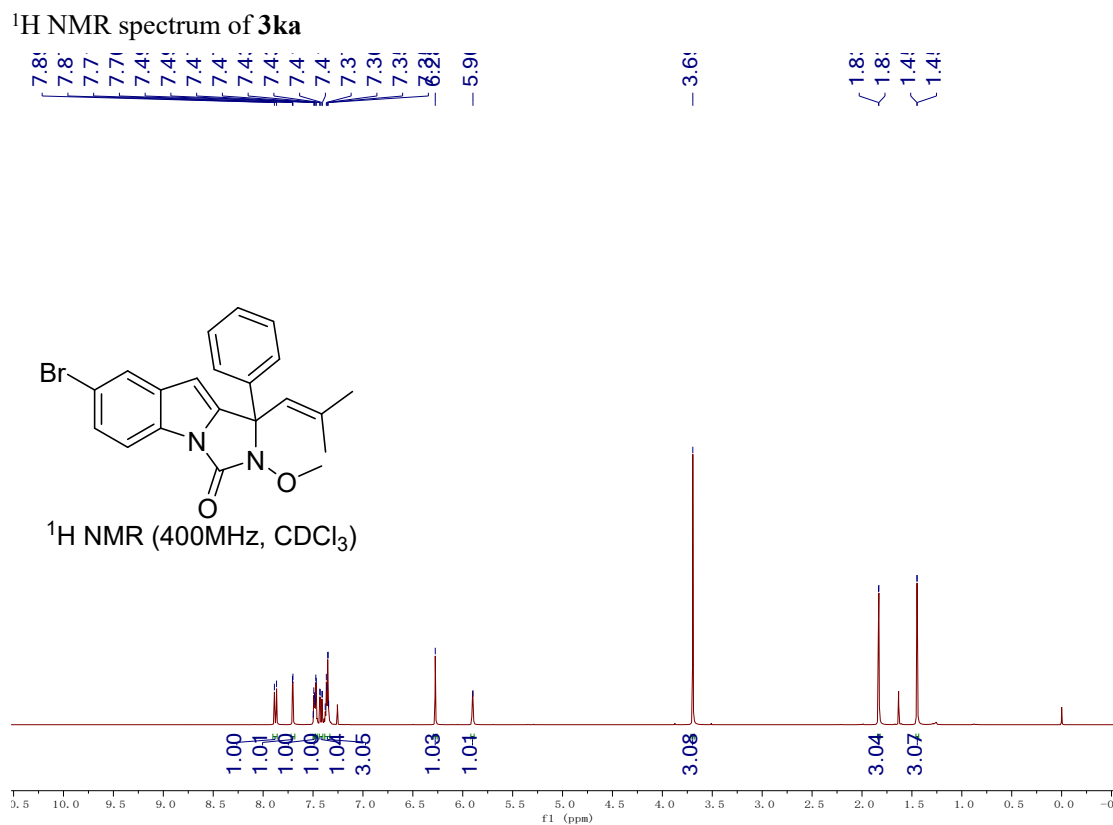



<sup>13</sup>C NMR spectrum of **3ka**

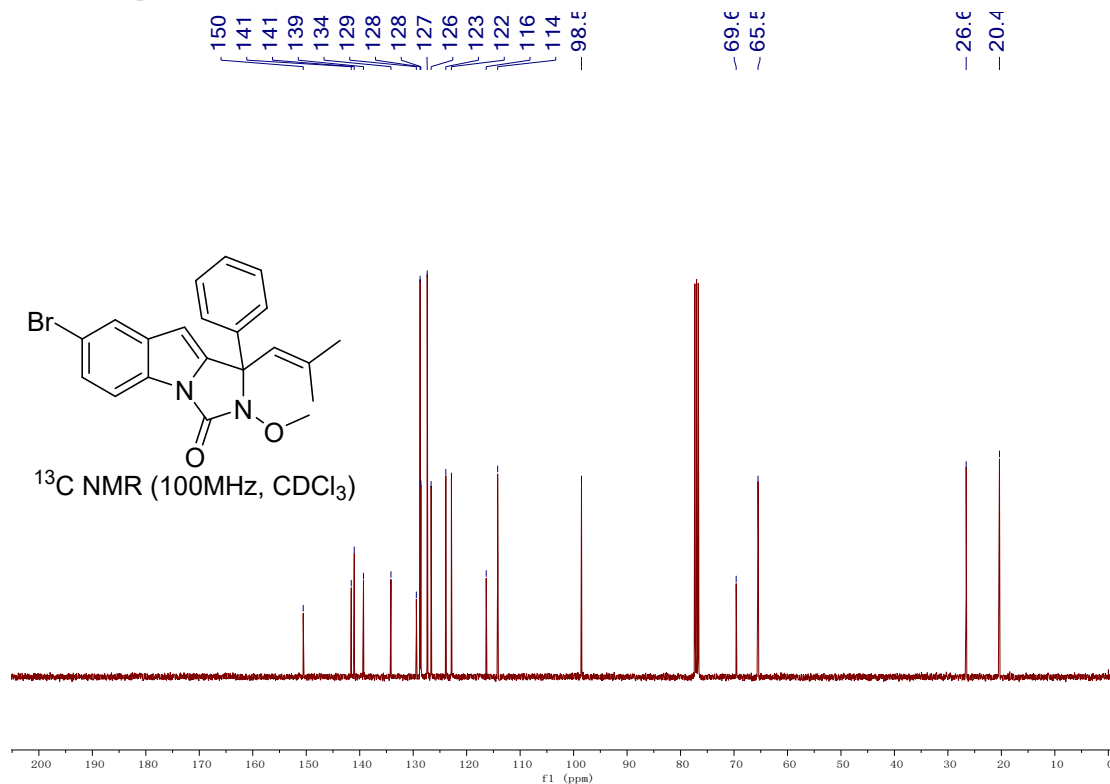

<sup>1</sup>H NMR spectrum of **3la**

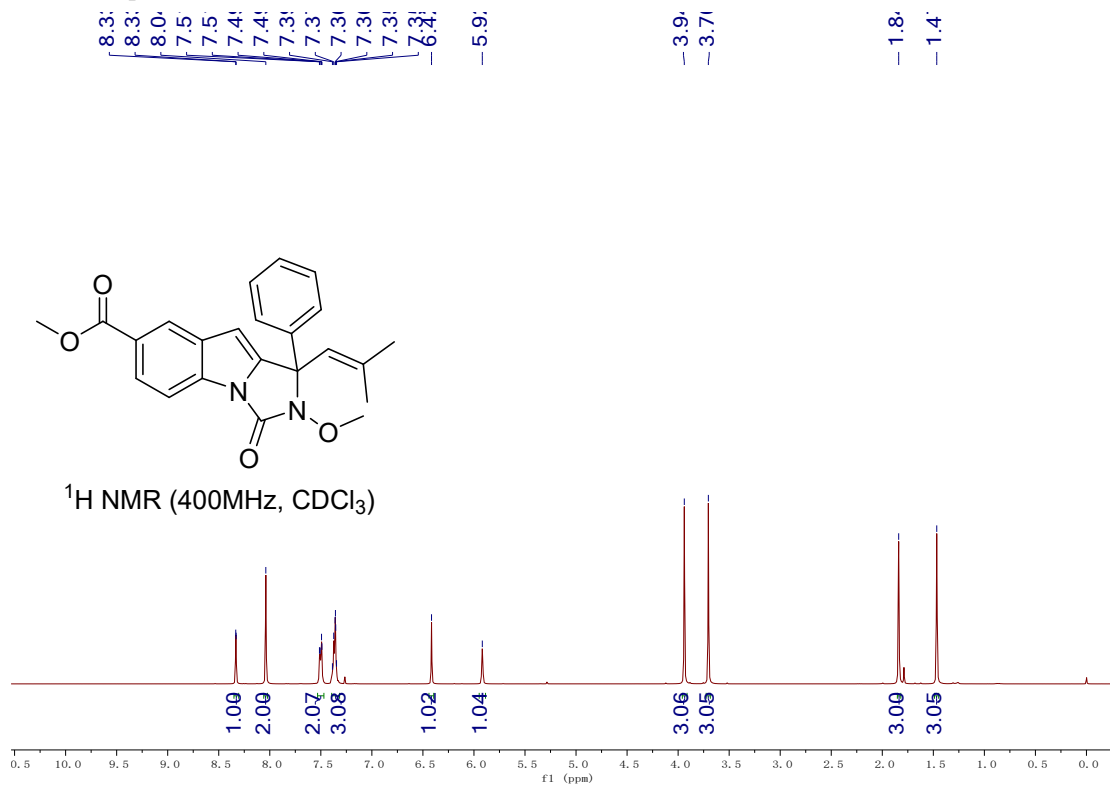

<sup>13</sup>C NMR spectrum of **3la**

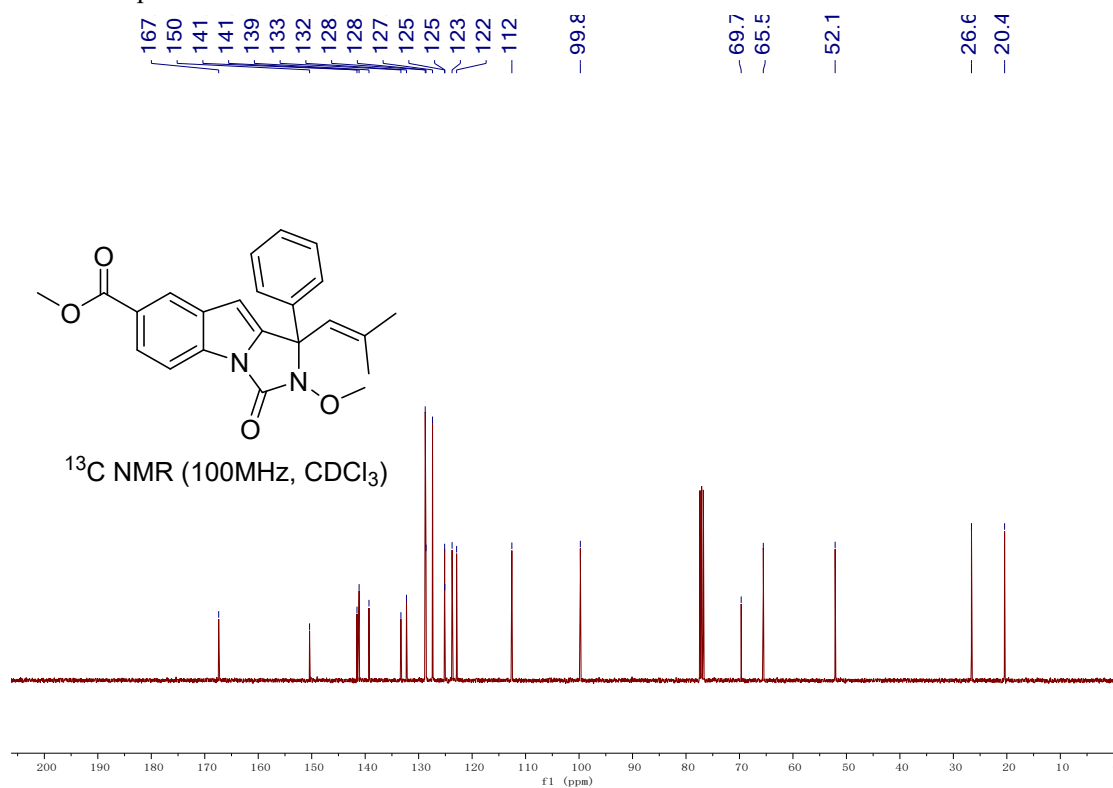

<sup>1</sup>H NMR spectrum of **3ma**

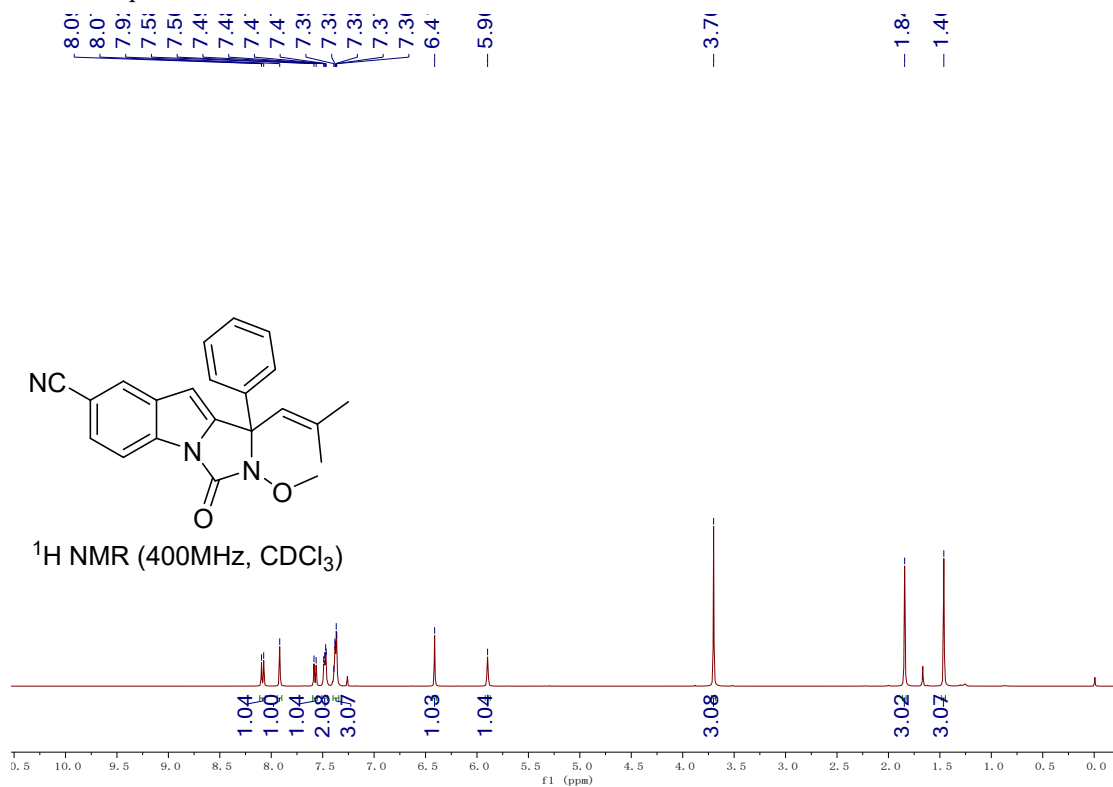

<sup>13</sup>C NMR spectrum of **3ma**

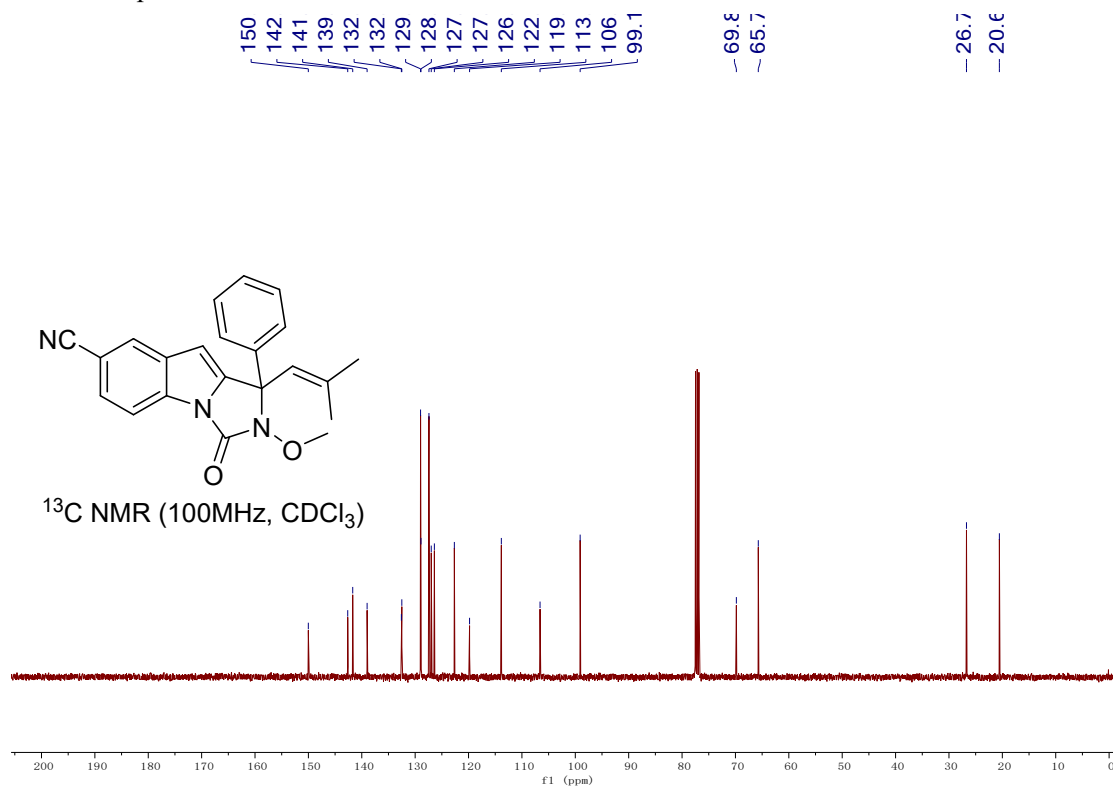

<sup>1</sup>H NMR spectrum of **3na**

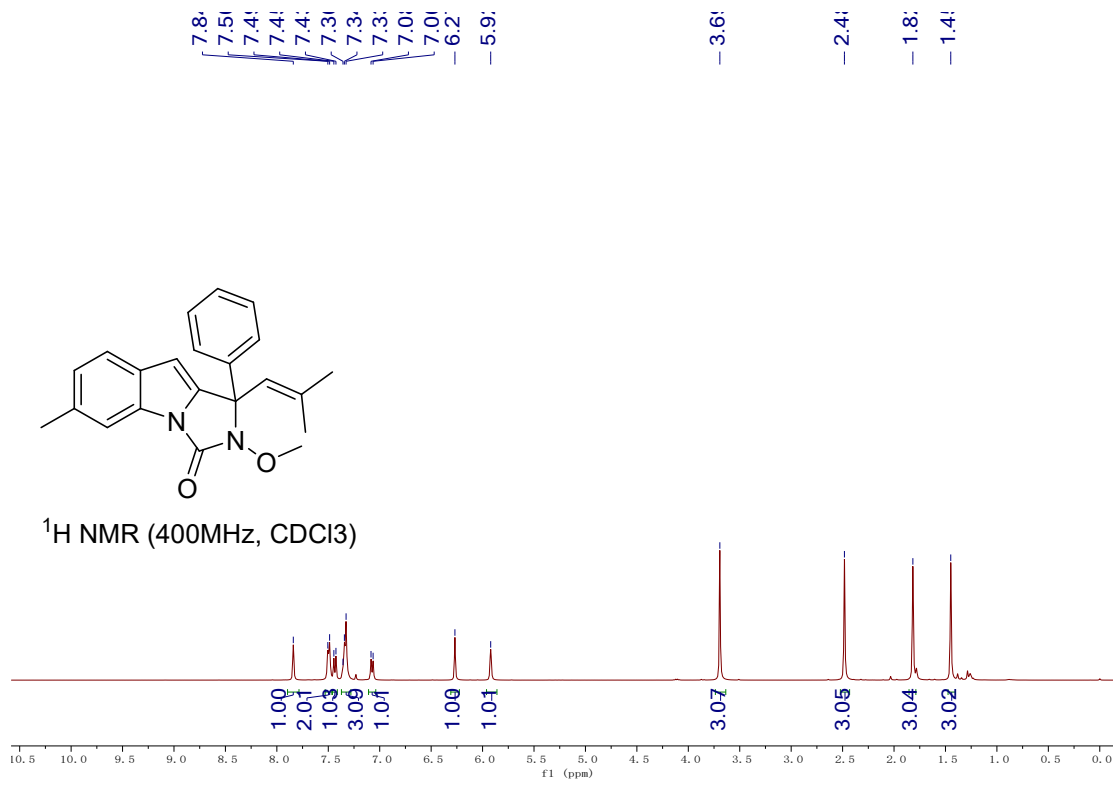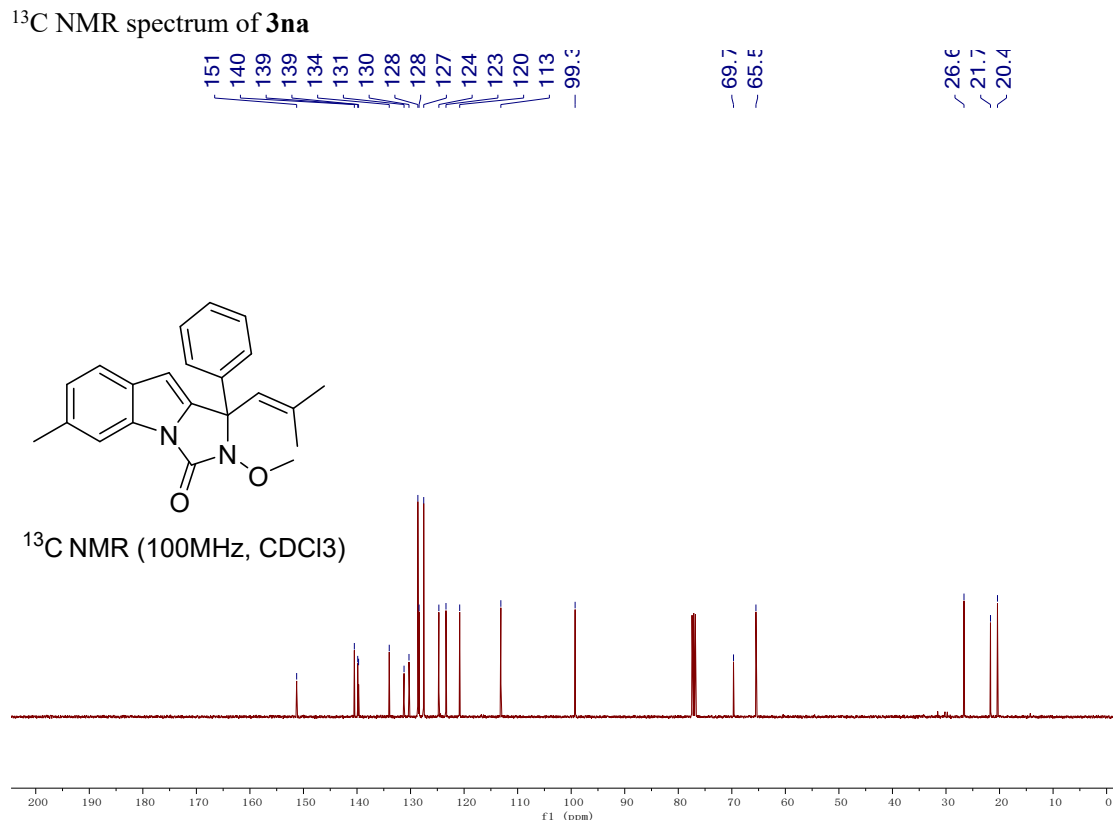

<sup>1</sup>H NMR spectrum of **30a**

7.5:  
7.5:  
7.5:  
7.5:  
7.4:  
7.4:  
7.4:  
7.3:  
7.3:  
6.9:  
6.9:  
6.8:  
6.8:  
6.2:  
5.9:

3.8:  
3.7:

1.8:  
1.4:

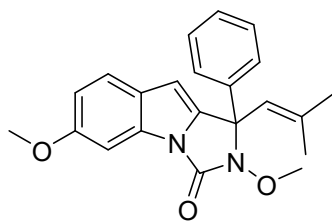

<sup>1</sup>H NMR (400MHz, CDCl<sub>3</sub>)

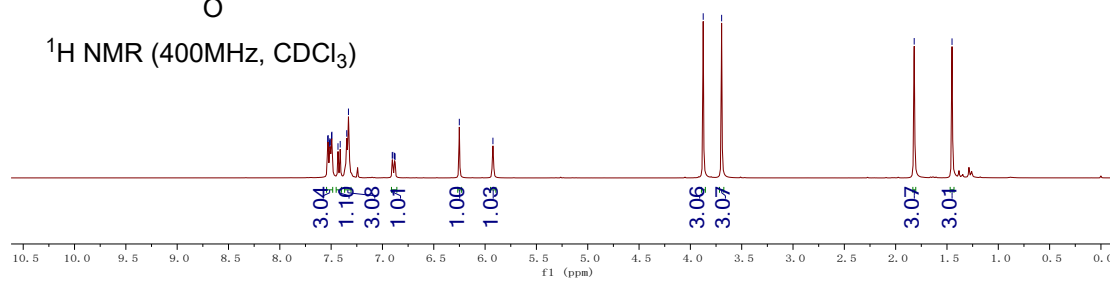

<sup>13</sup>C NMR spectrum of **30a**

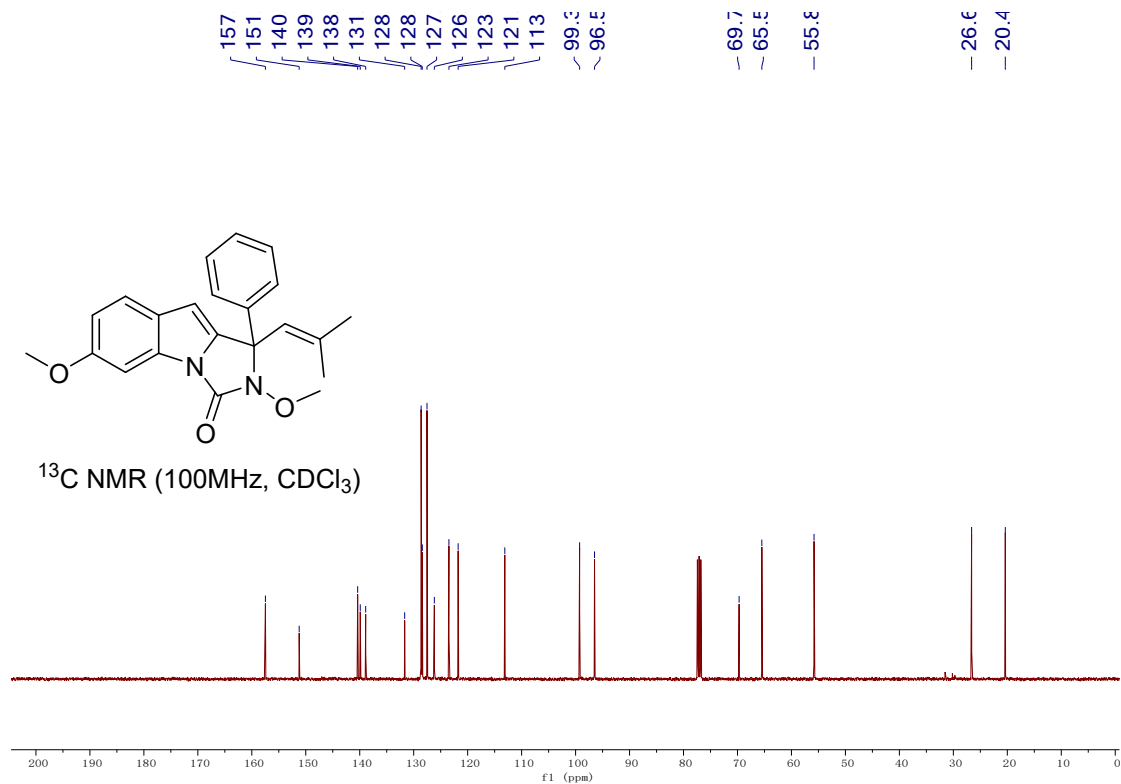

<sup>1</sup>H NMR spectrum of **3pa**

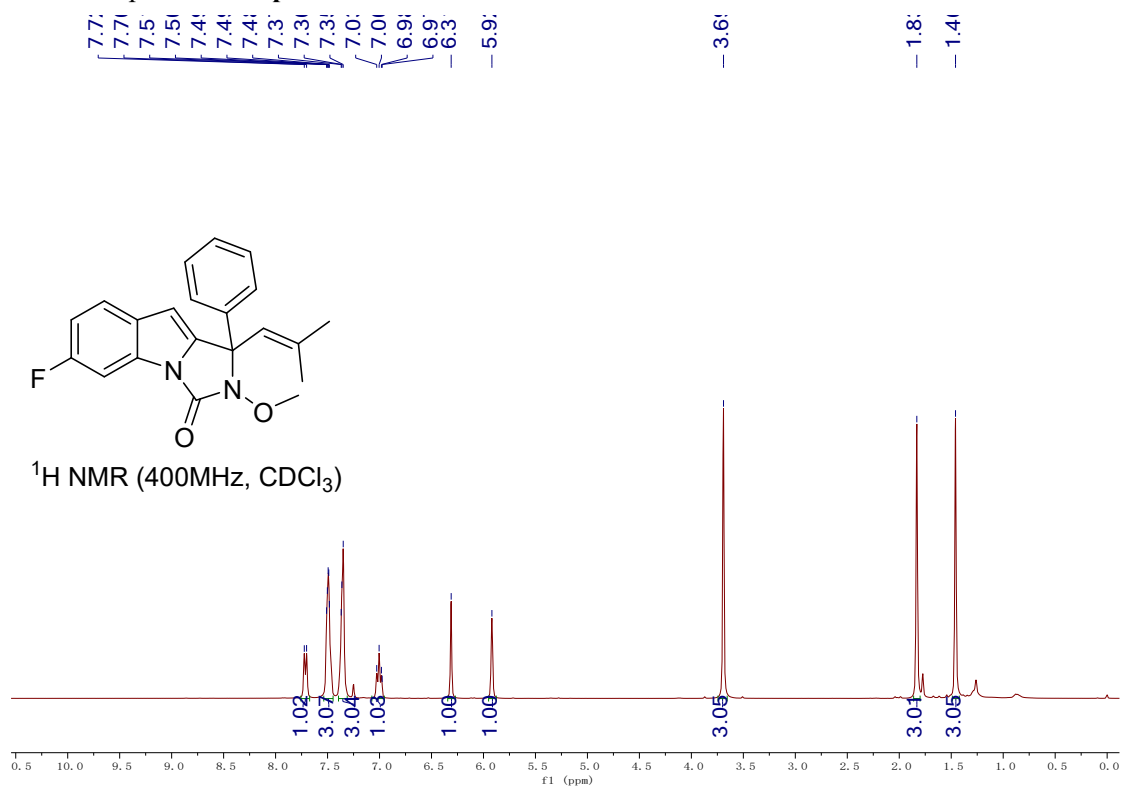

<sup>13</sup>C NMR spectrum of **3pa**

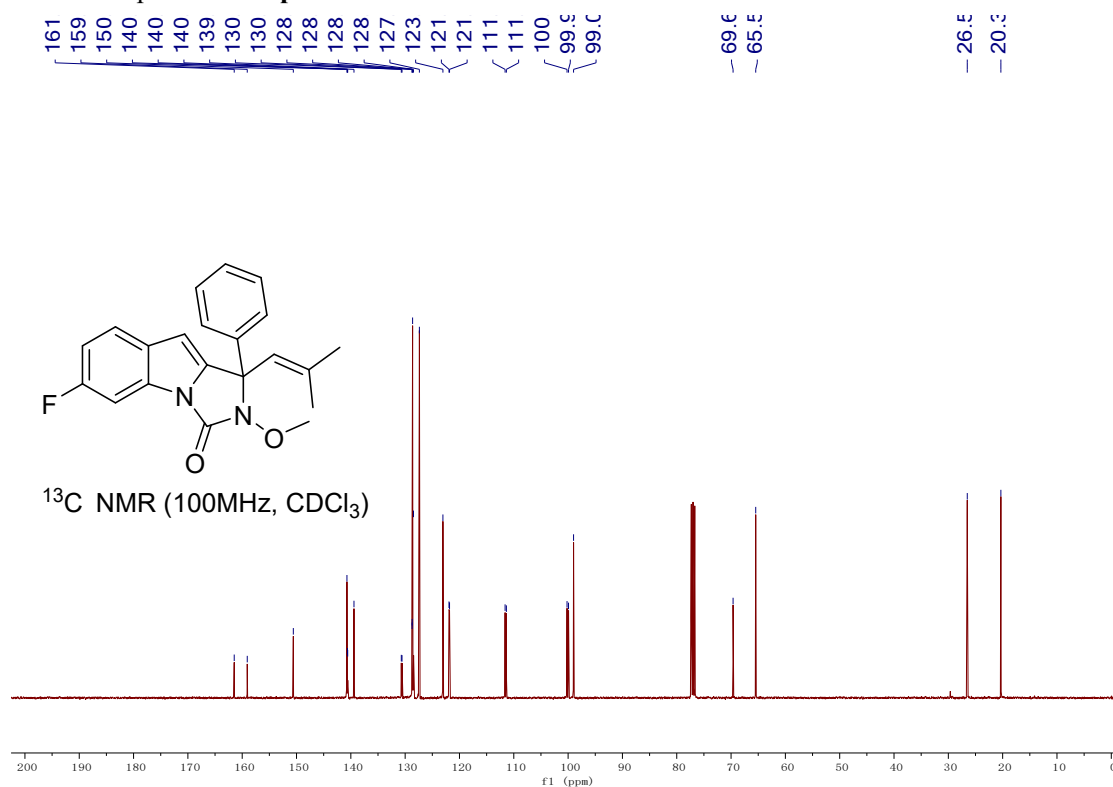

<sup>19</sup>F NMR spectrum of **3pa**

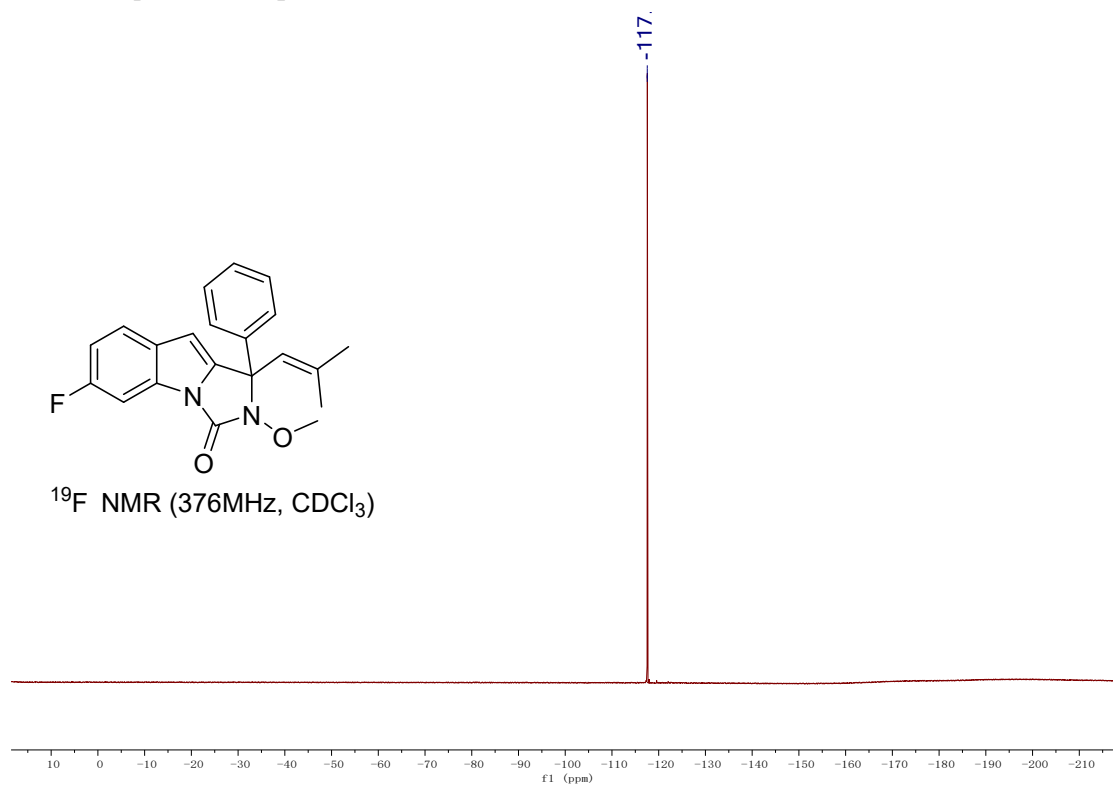

<sup>1</sup>H NMR spectrum of **3qa**

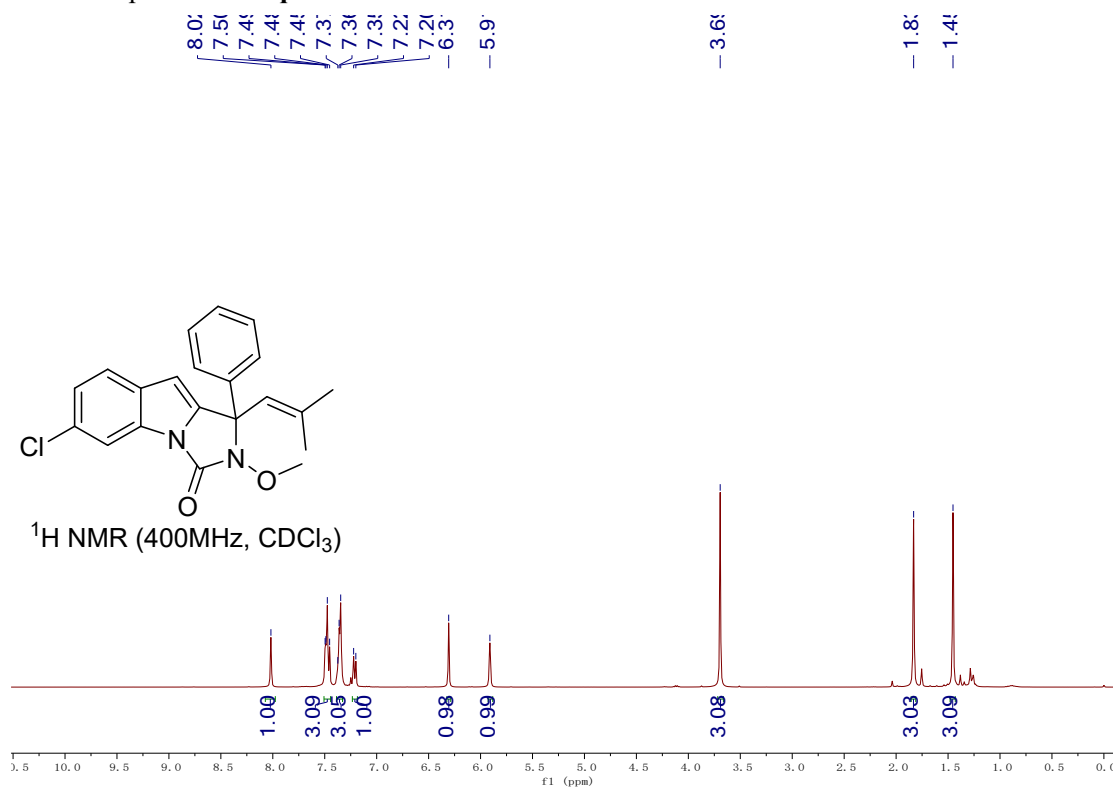

<sup>13</sup>C NMR spectrum of **3qa**

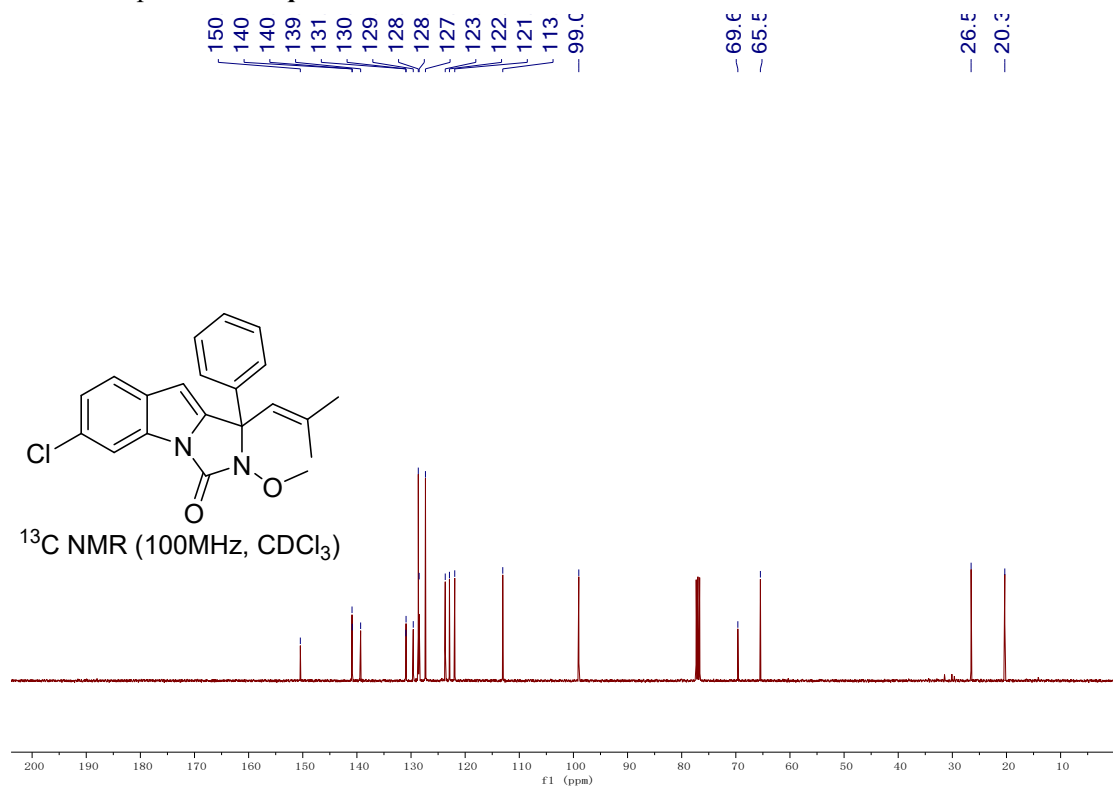



<sup>1</sup>H NMR spectrum of **3ra**

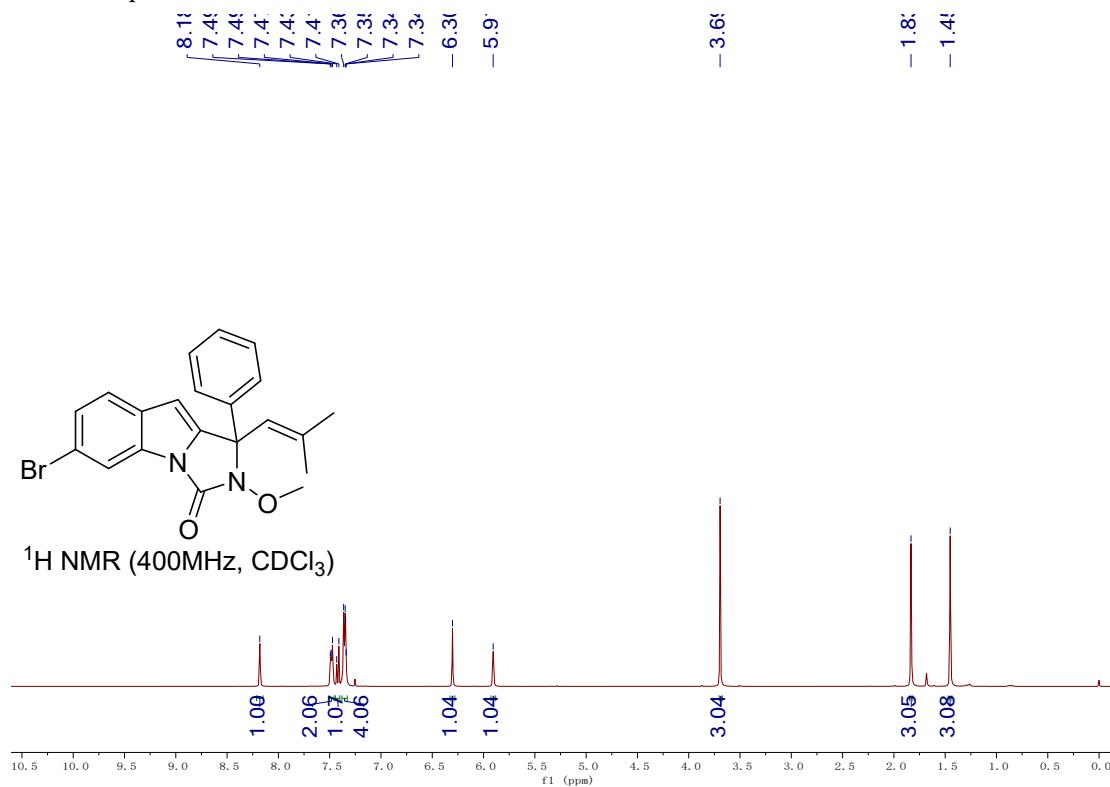

<sup>13</sup>C NMR spectrum of **3ra**

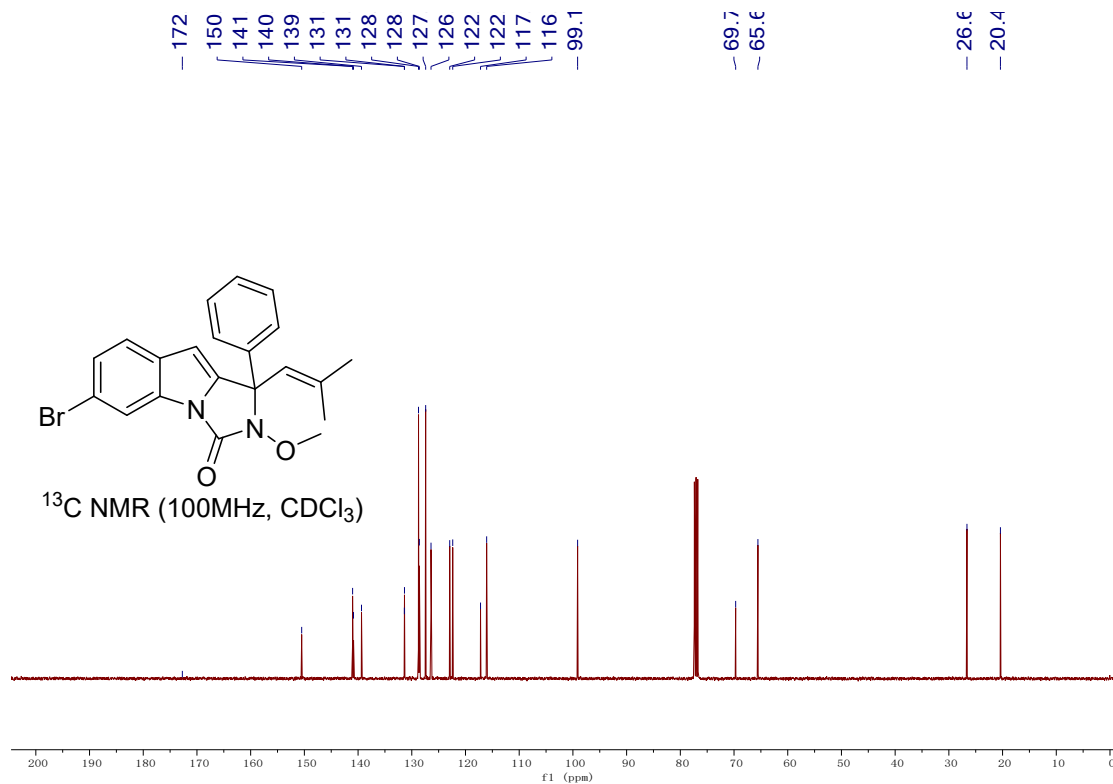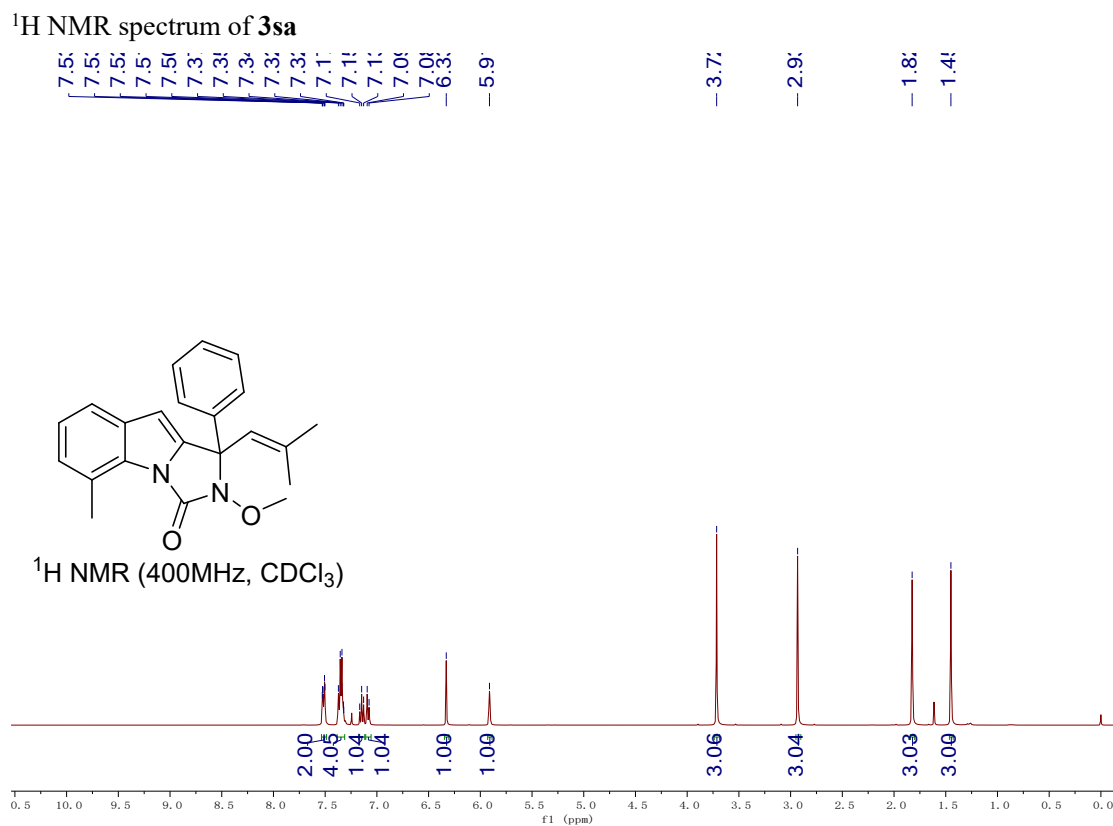

<sup>13</sup>C NMR spectrum of **3sa**

151  
141  
140  
140  
133  
131  
128  
128  
127  
126  
125  
123  
118  
— 100  
68.8  
65.3  
26.7  
21.5  
20.4

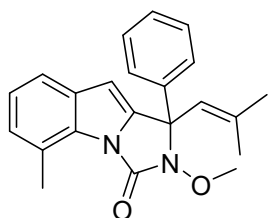

<sup>13</sup>C NMR (100MHz, CDCl<sub>3</sub>)

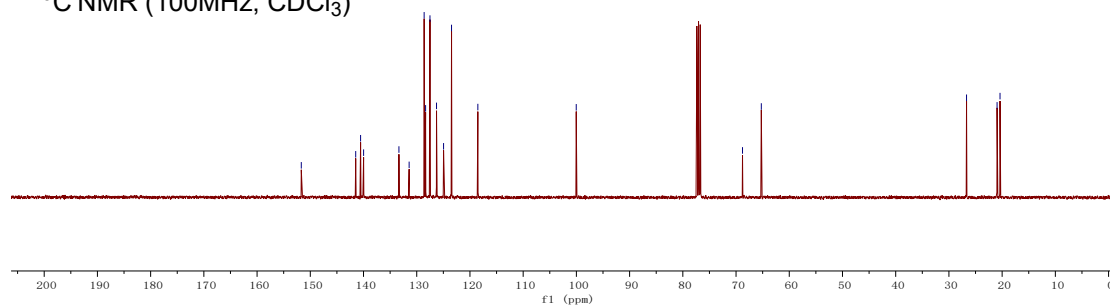

<sup>1</sup>H NMR spectrum of **3ta**

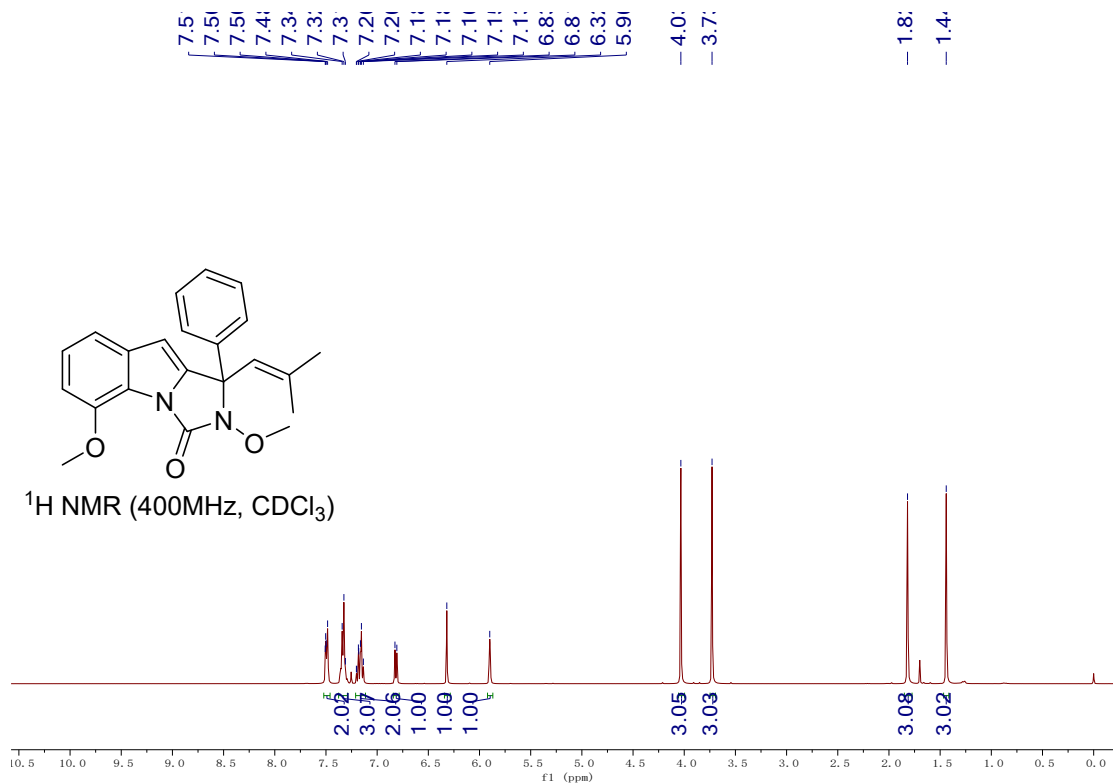

**<sup>13</sup>C NMR spectrum of 3ta**

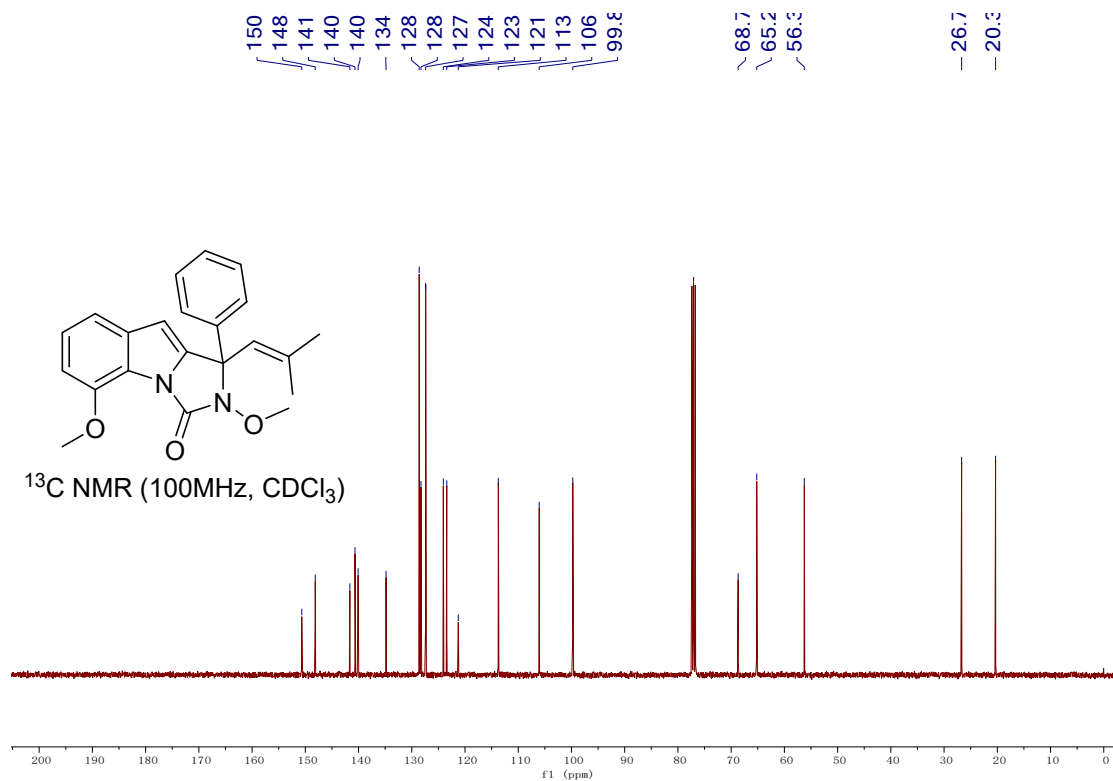

<sup>1</sup>H NMR spectrum of **3ab**

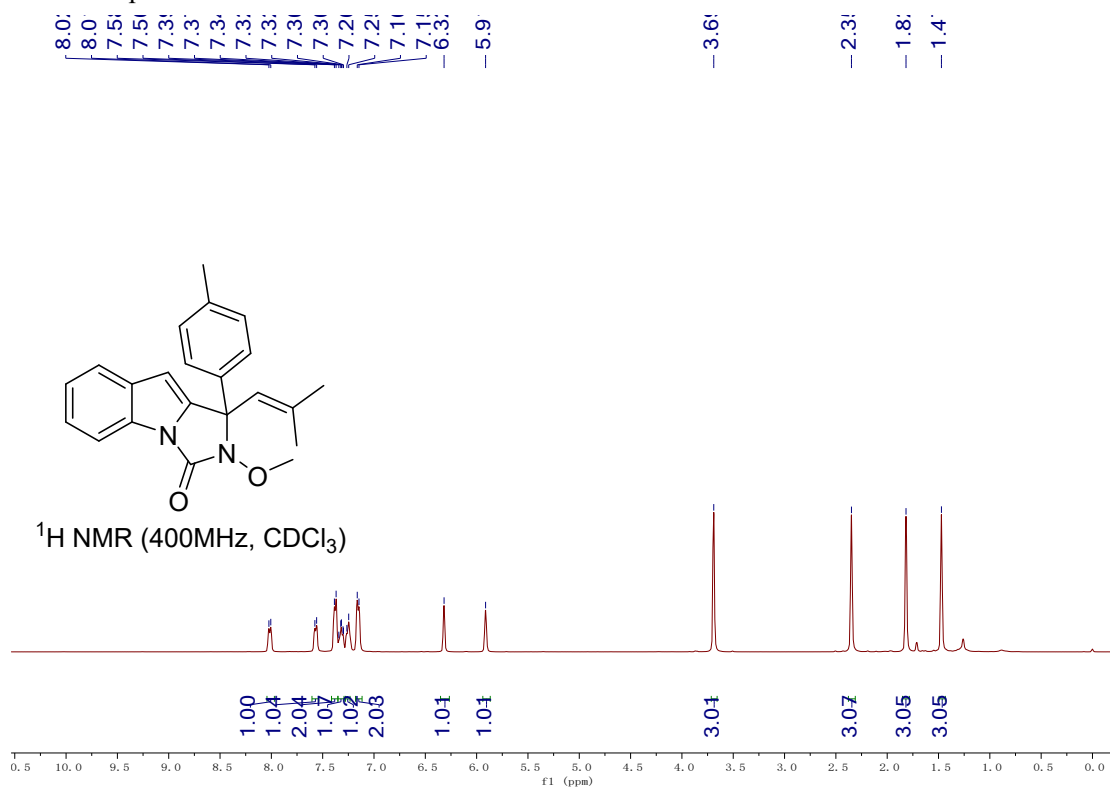

<sup>13</sup>C NMR spectrum of **3ab**

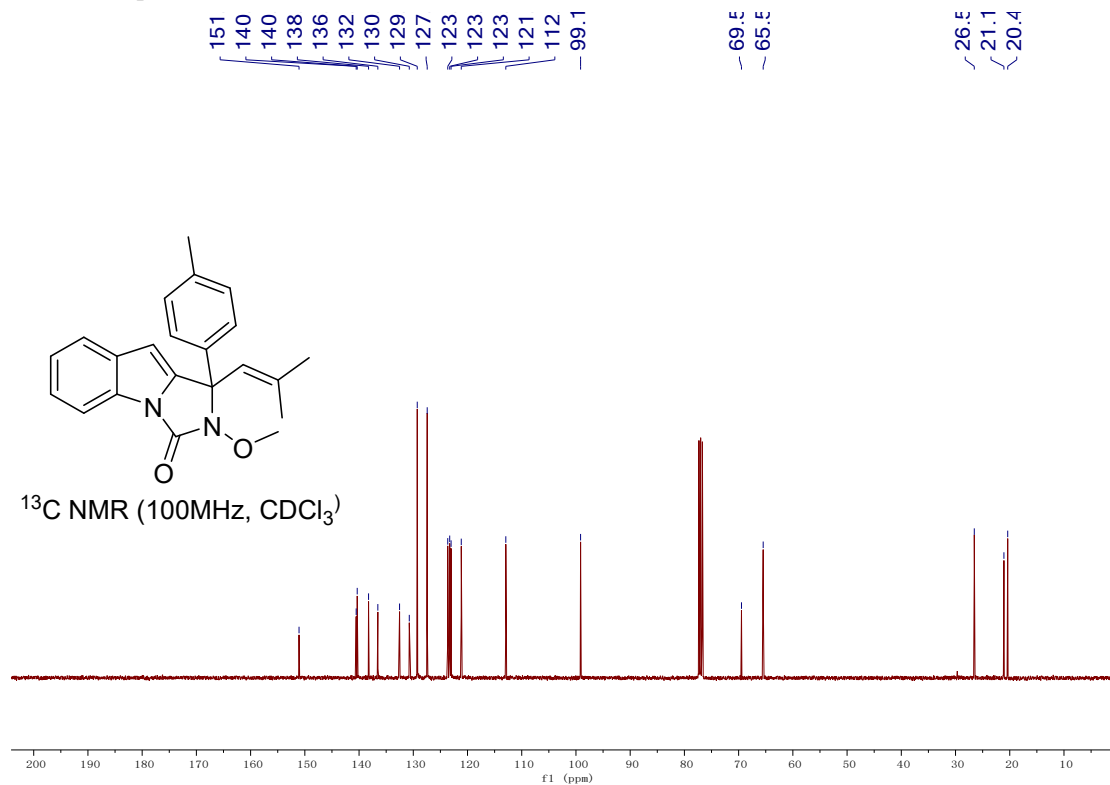

<sup>1</sup>H NMR spectrum of **3ac**

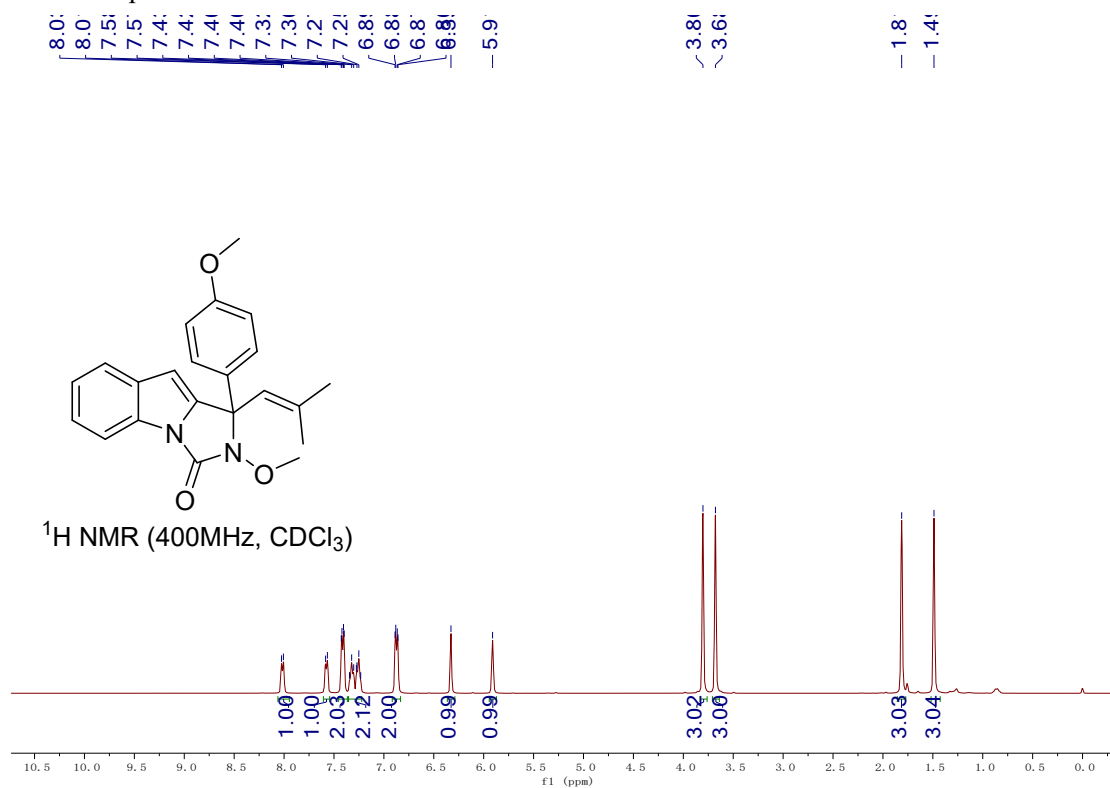

<sup>13</sup>C NMR spectrum of **3ac**

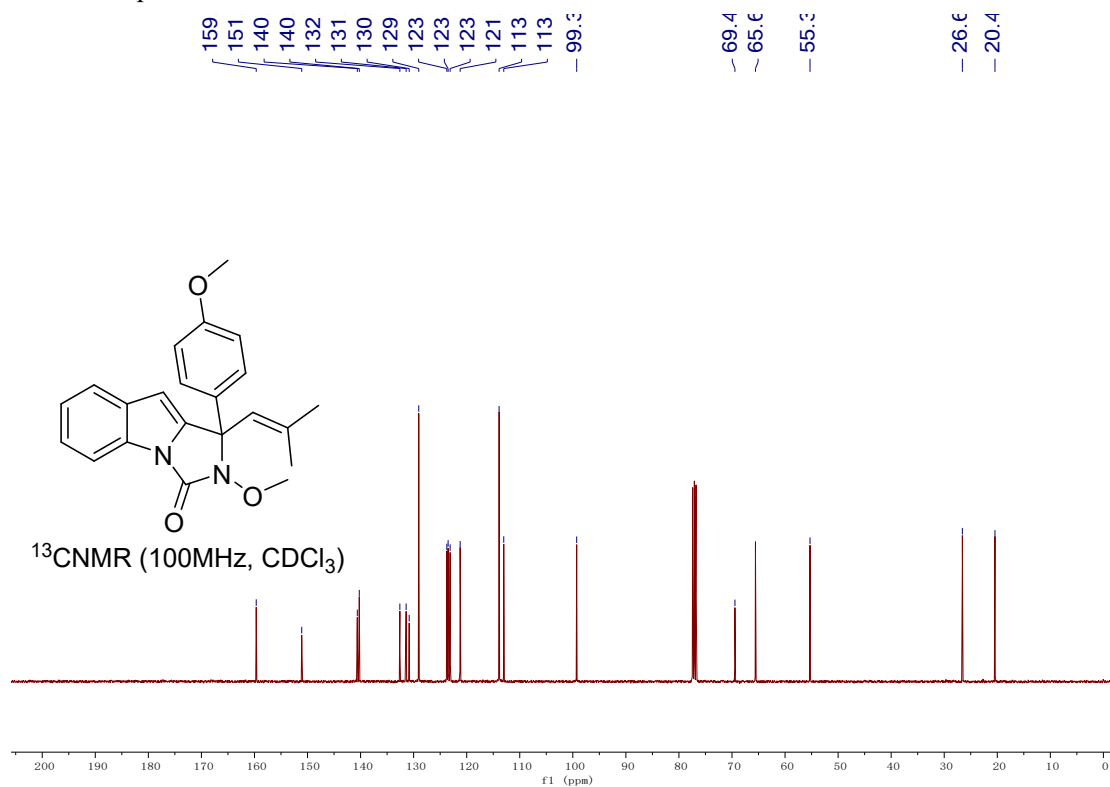

<sup>1</sup>H NMR spectrum of **3ad**

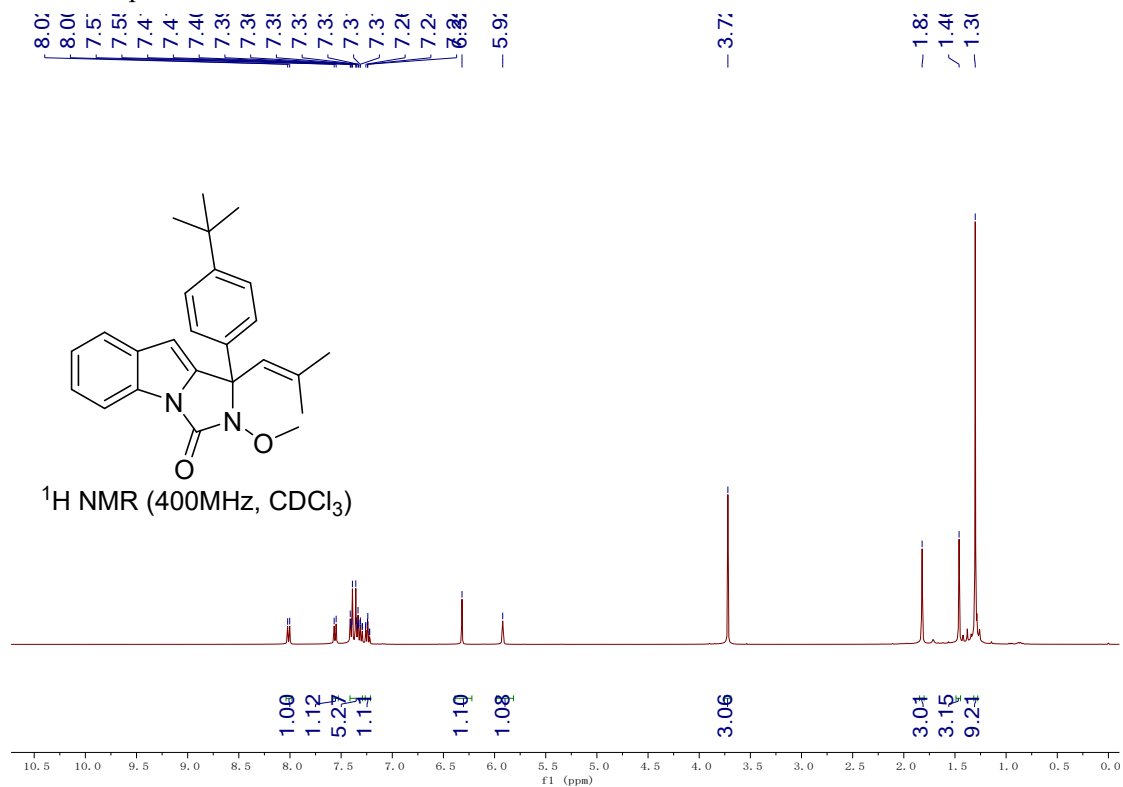

<sup>13</sup>C NMR spectrum of **3ad**

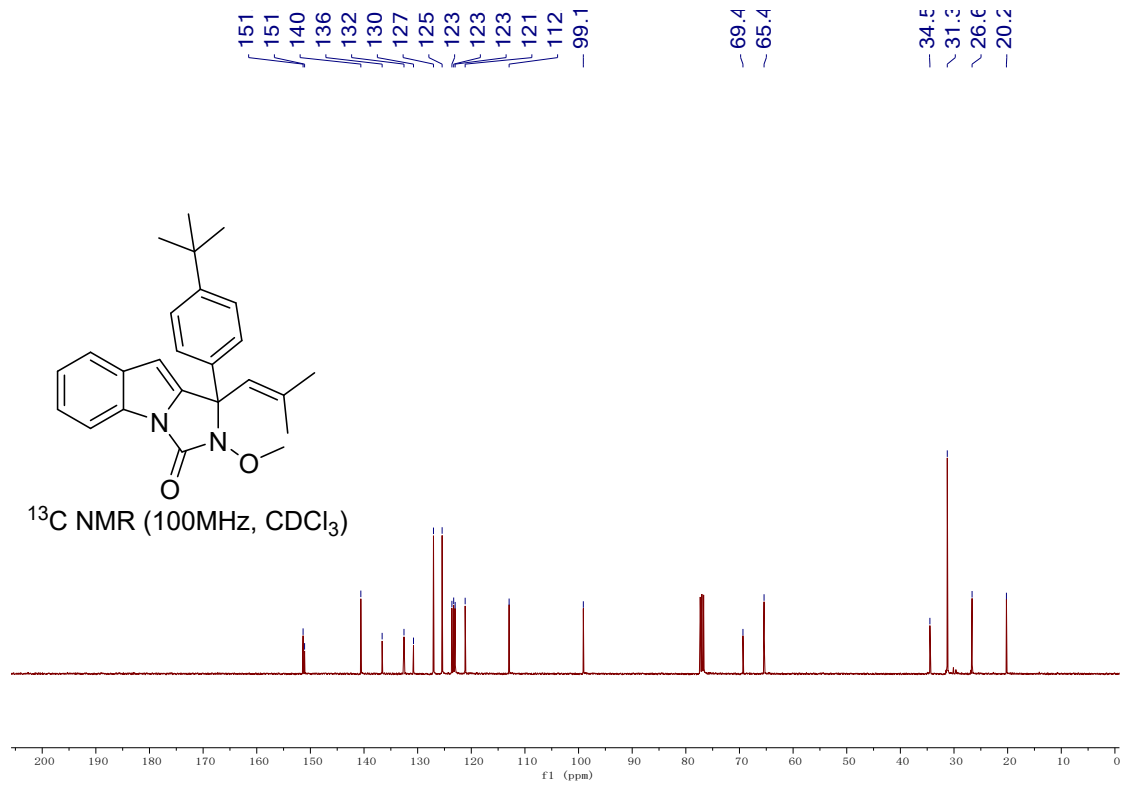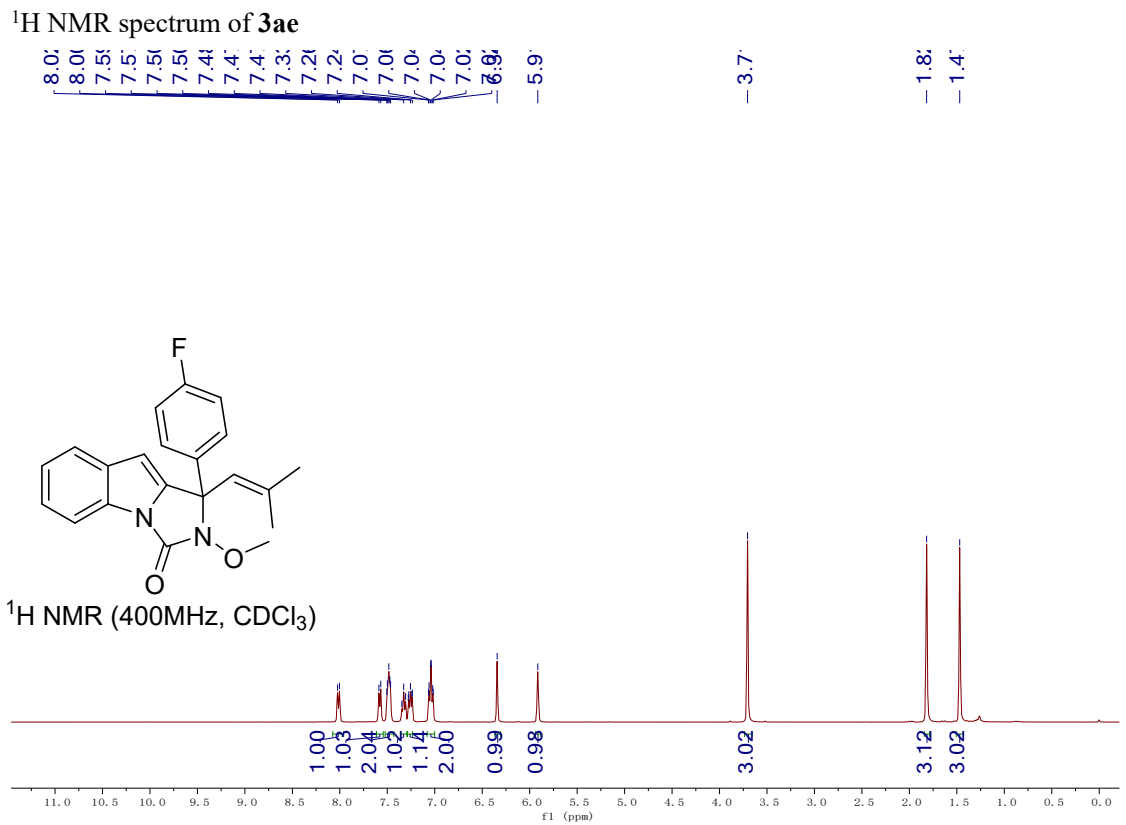



<sup>13</sup>C NMR spectrum of **3ae**

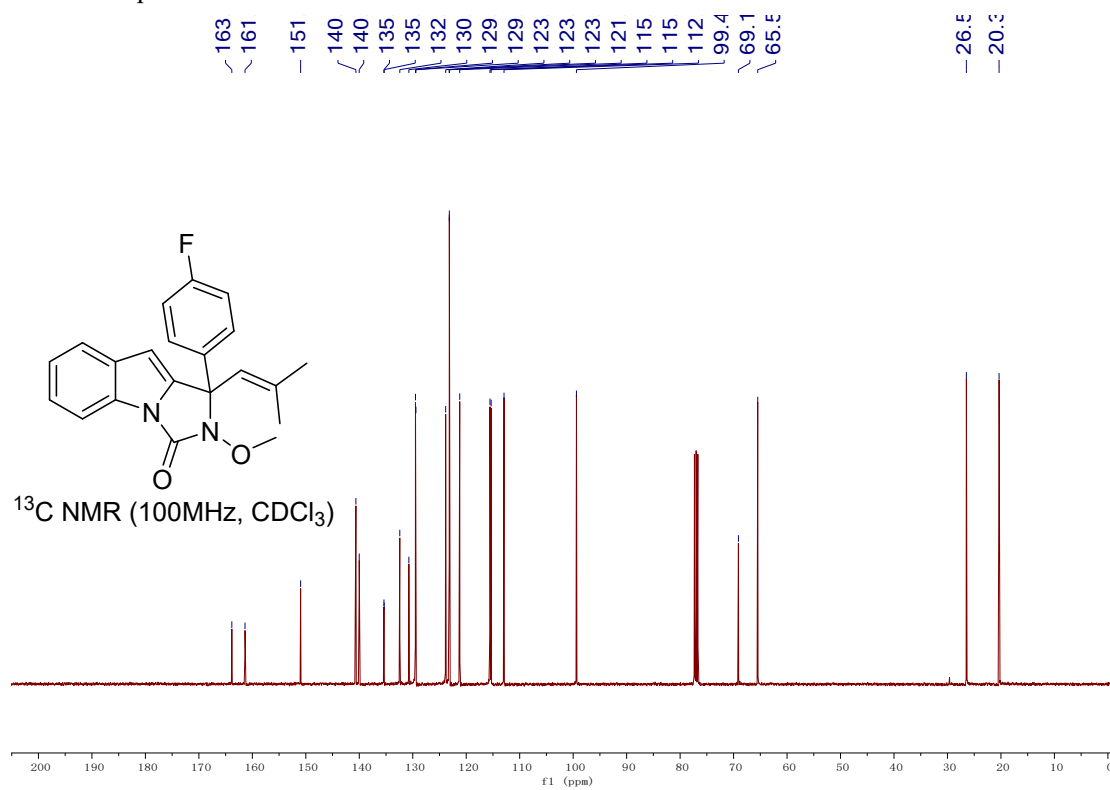

<sup>19</sup>F NMR spectrum of **3ae**

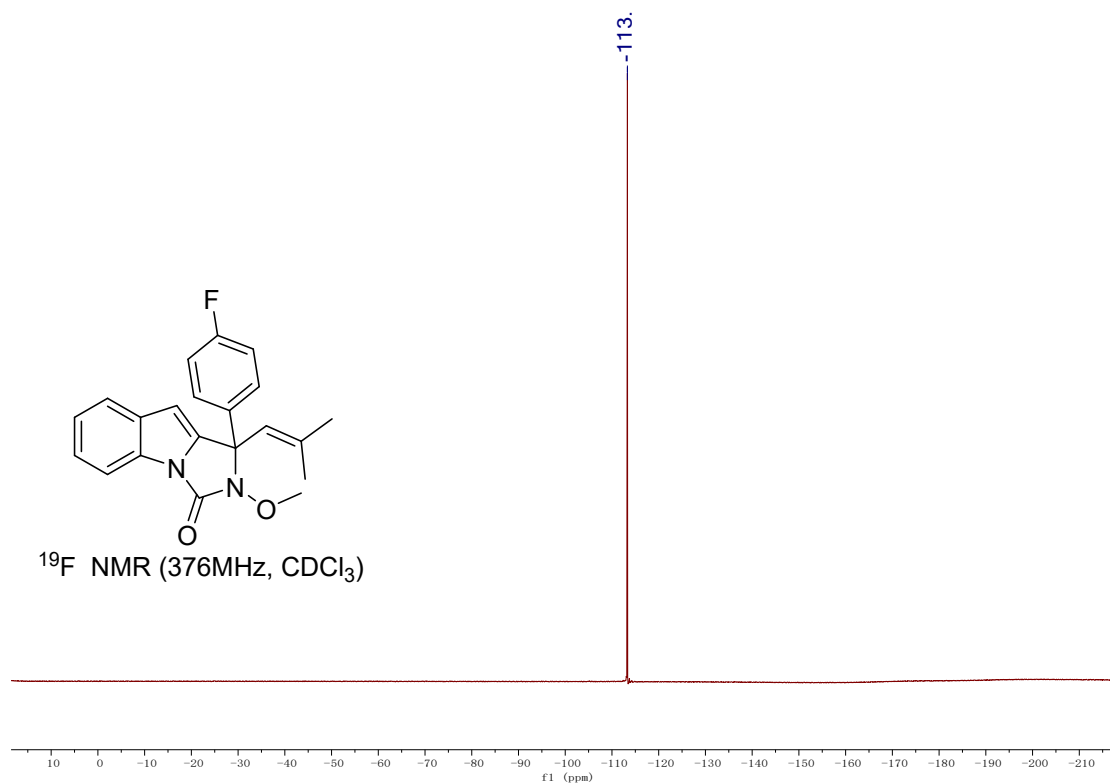

$^1\text{H}$  NMR spectrum of **3af**

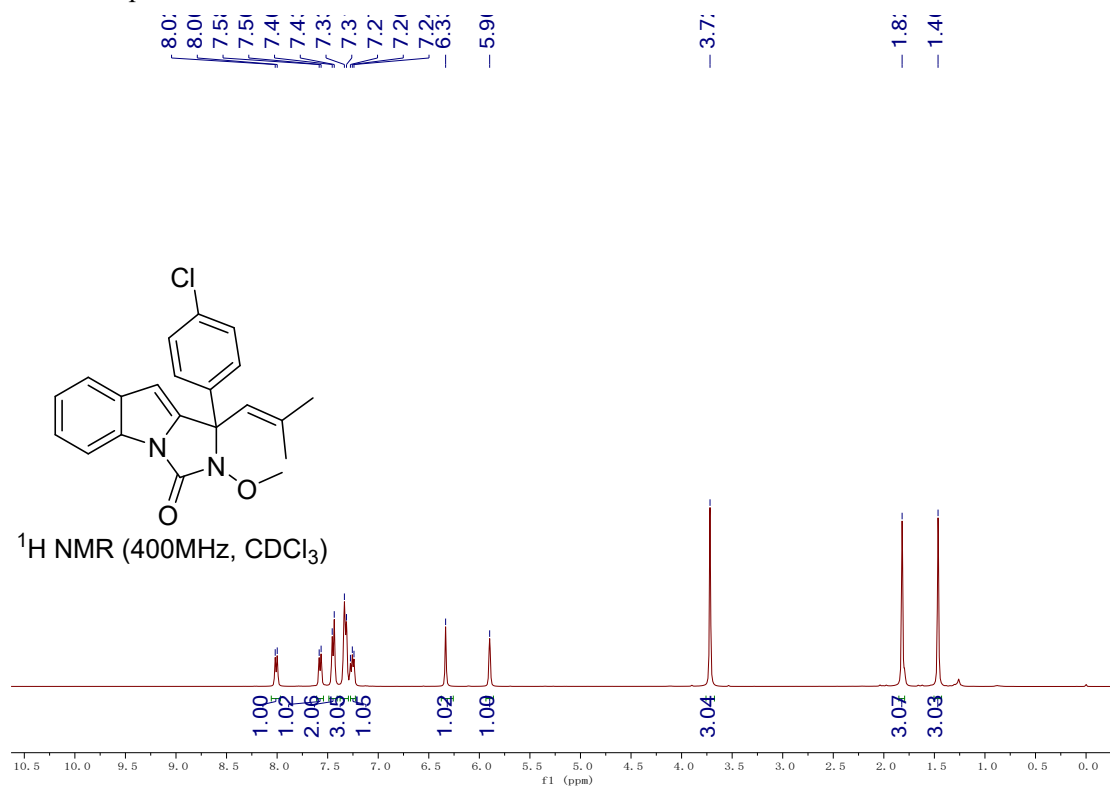

<sup>13</sup>C NMR spectrum of **3af**

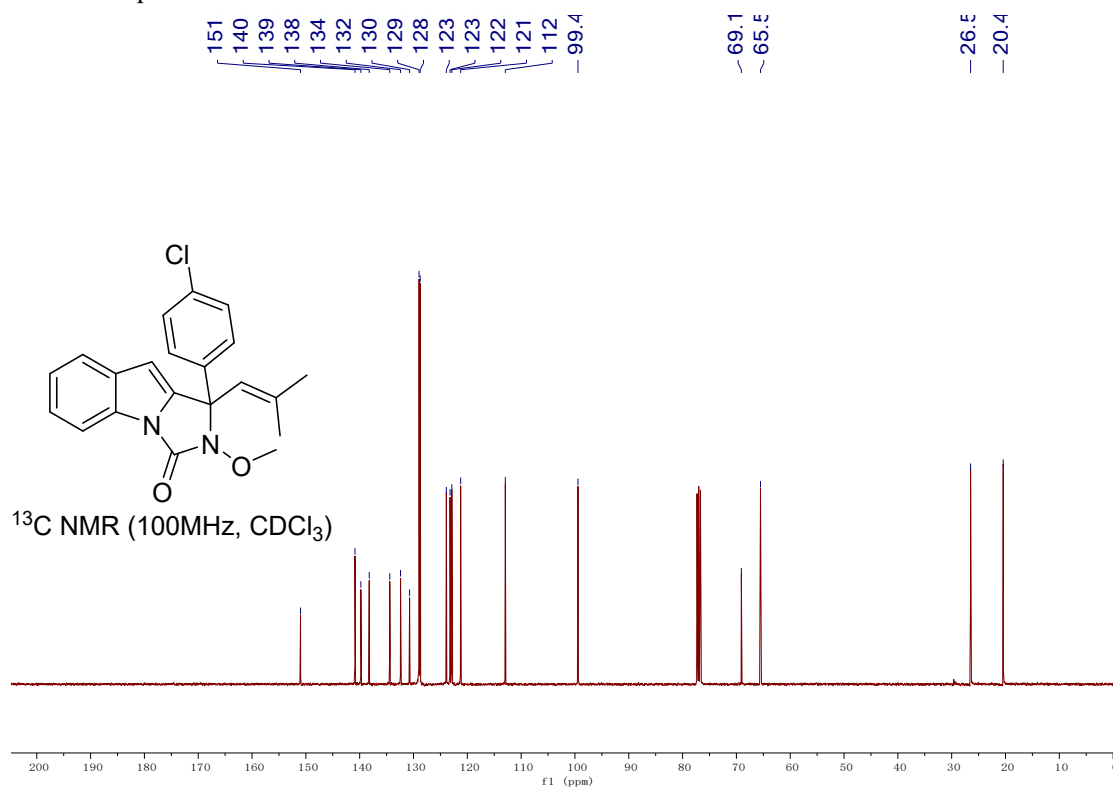

<sup>1</sup>H NMR spectrum of **3ag**

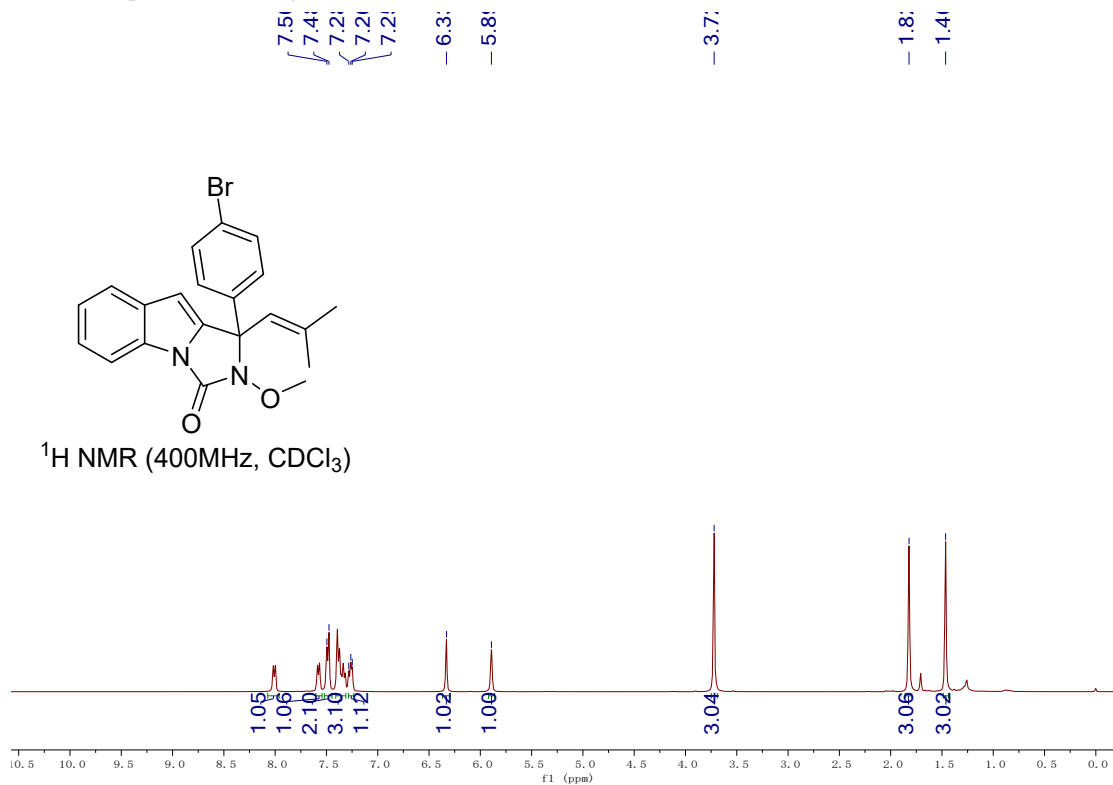

<sup>13</sup>C NMR spectrum of **3ag**

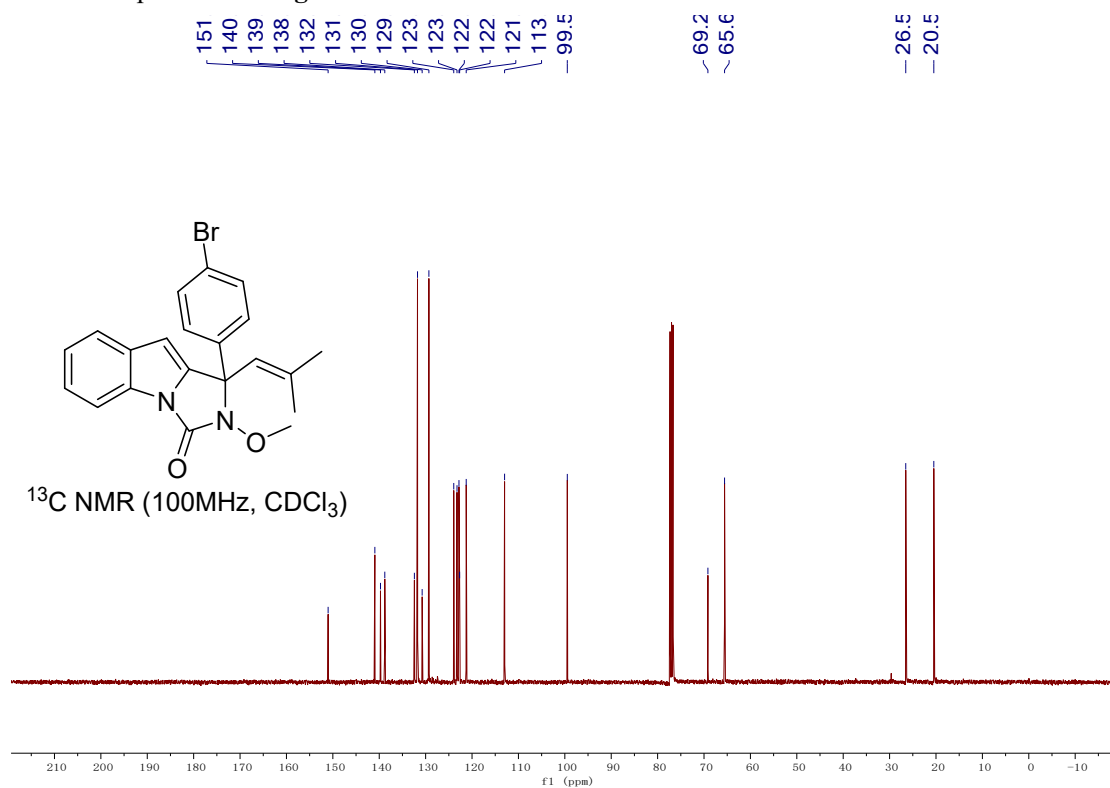

<sup>1</sup>H NMR spectrum of **3ah**

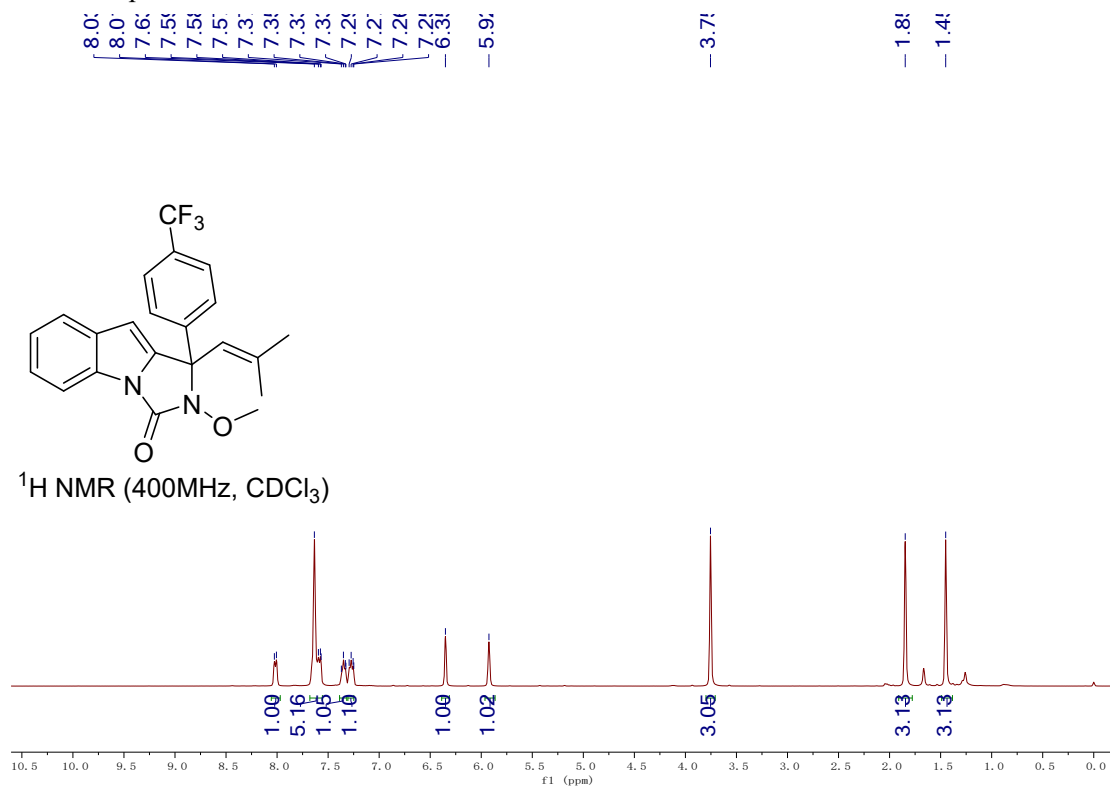

<sup>13</sup>C NMR spectrum of **3ah**

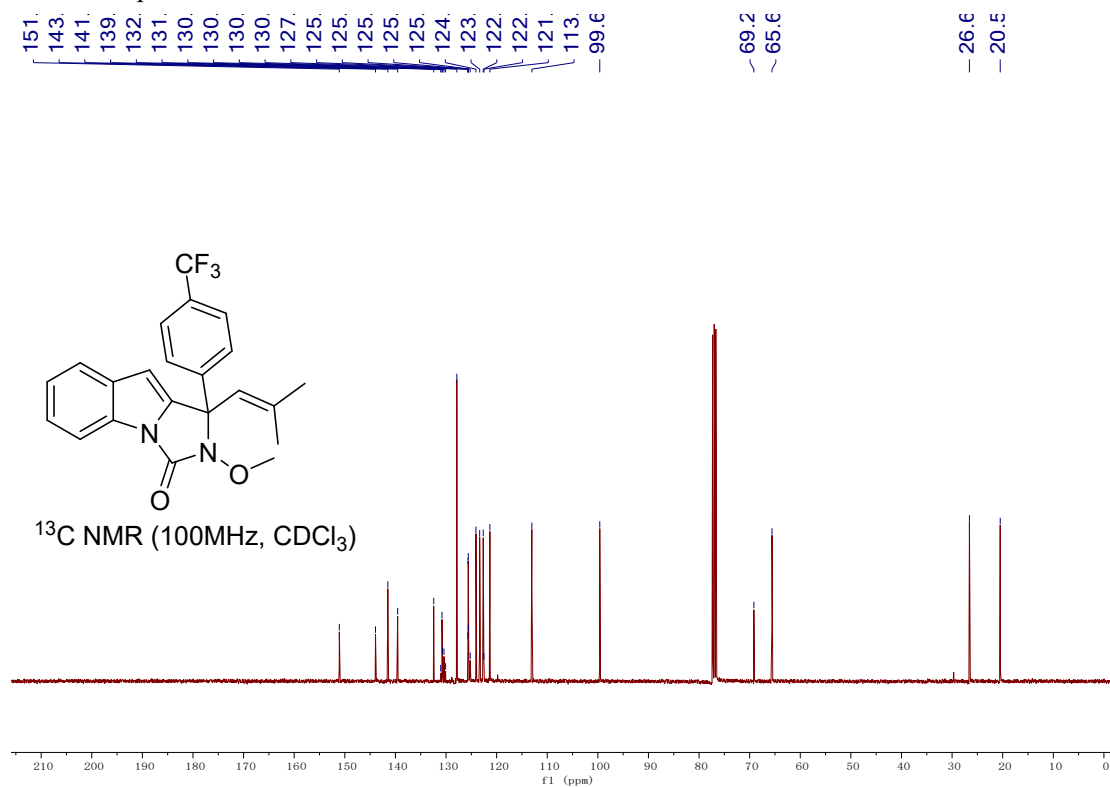

<sup>19</sup>F NMR spectrum of **3ah**

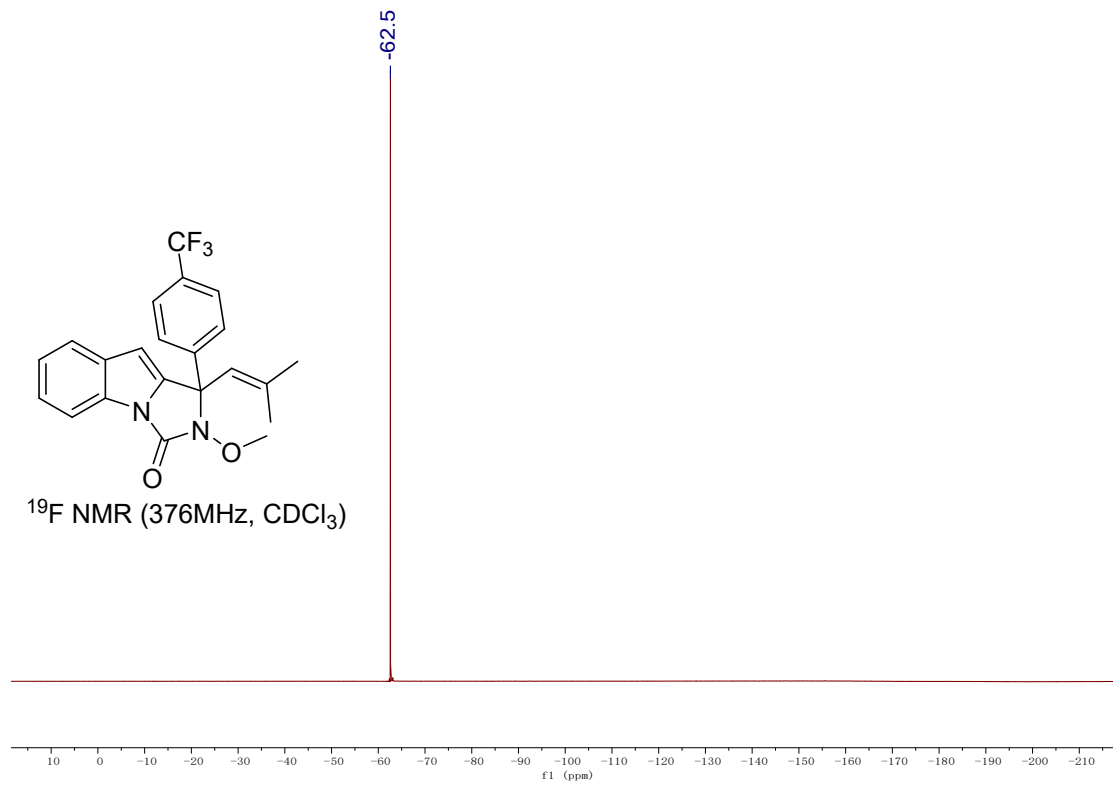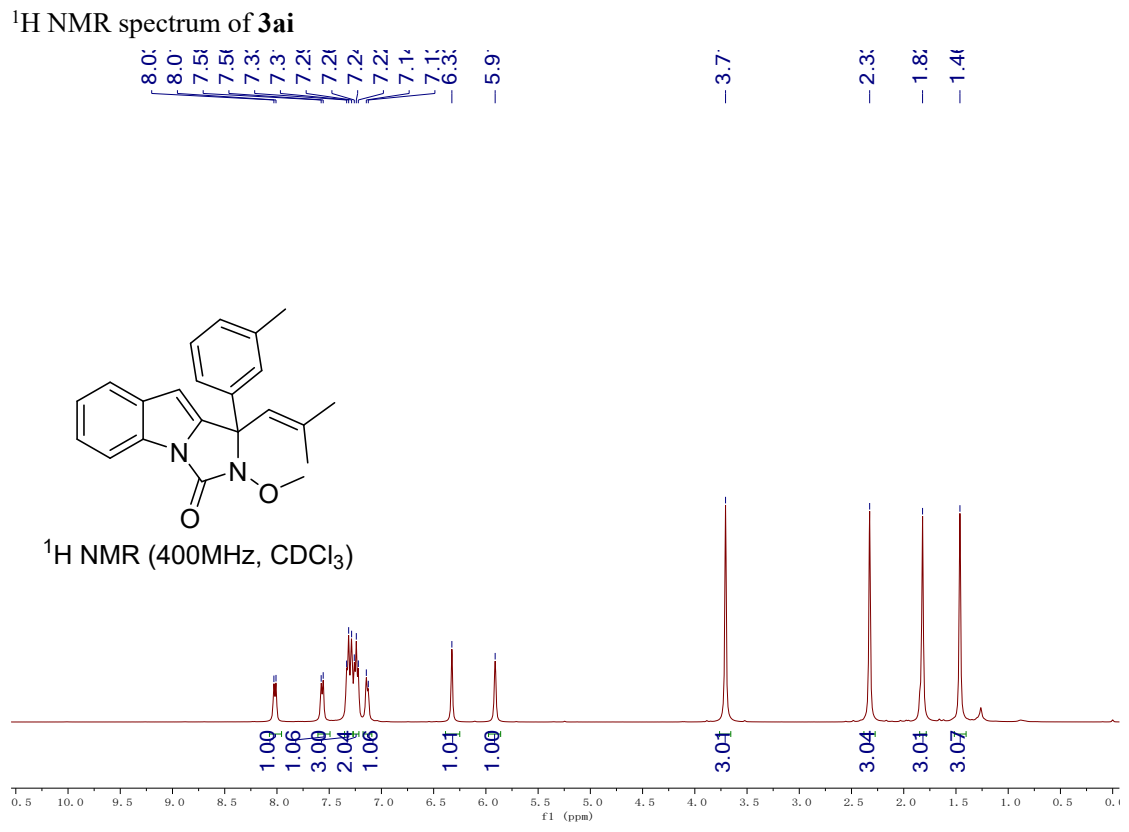

<sup>13</sup>C NMR spectrum of **3ai**

151  
140  
139  
138  
132  
130  
129  
128  
127  
124  
123  
123  
123  
121  
112  
-99.1  
-69.4  
-65.4  
26.4  
21.4  
20.3

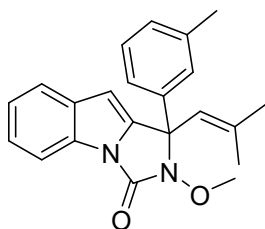

<sup>13</sup>C NMR (100MHz, CDCl<sub>3</sub>)

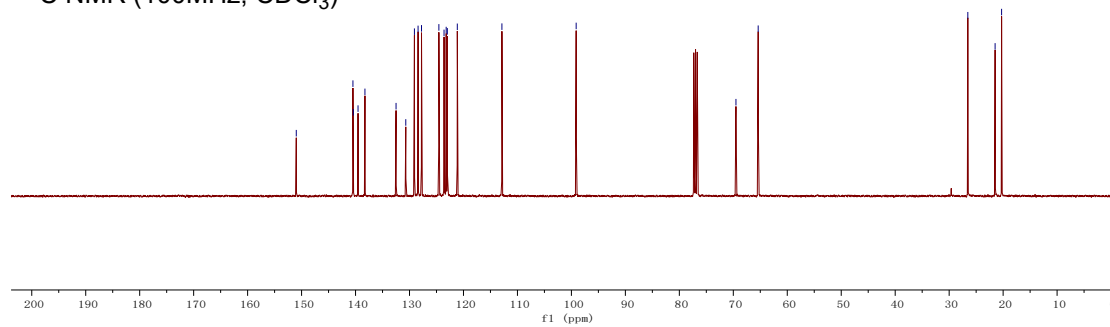

<sup>1</sup>H NMR spectrum of **3aj**

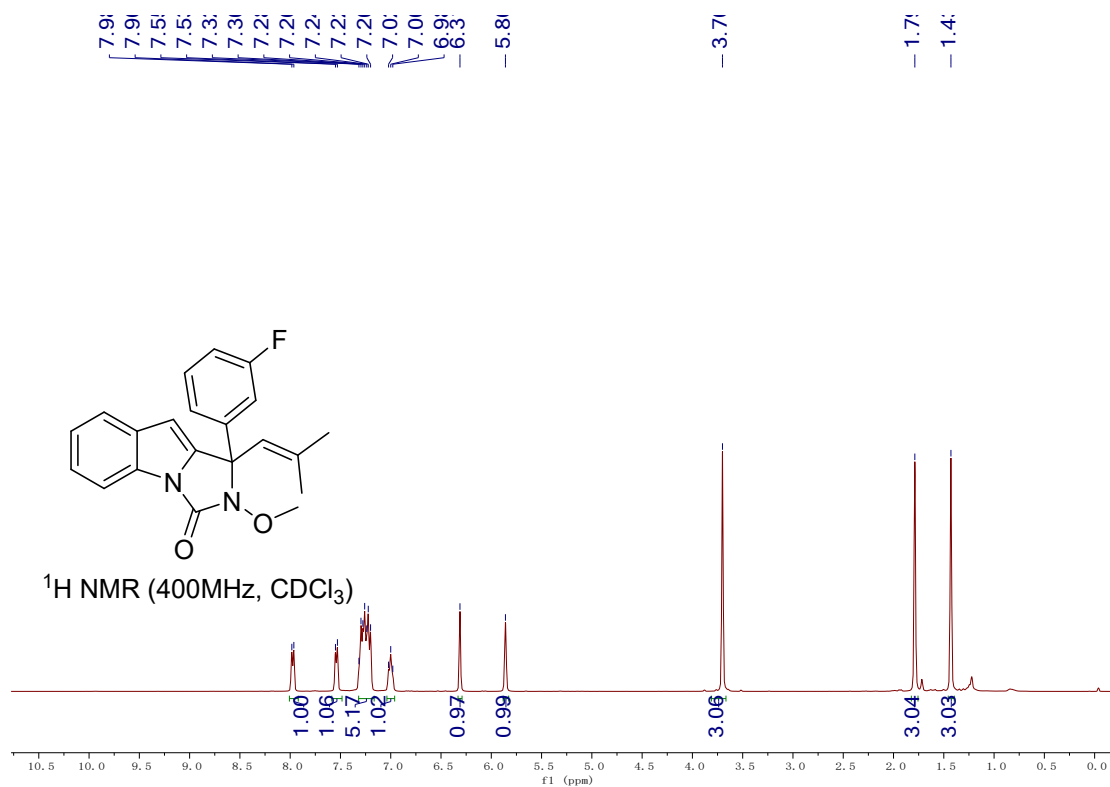

**<sup>13</sup>C NMR spectrum of **3aj****

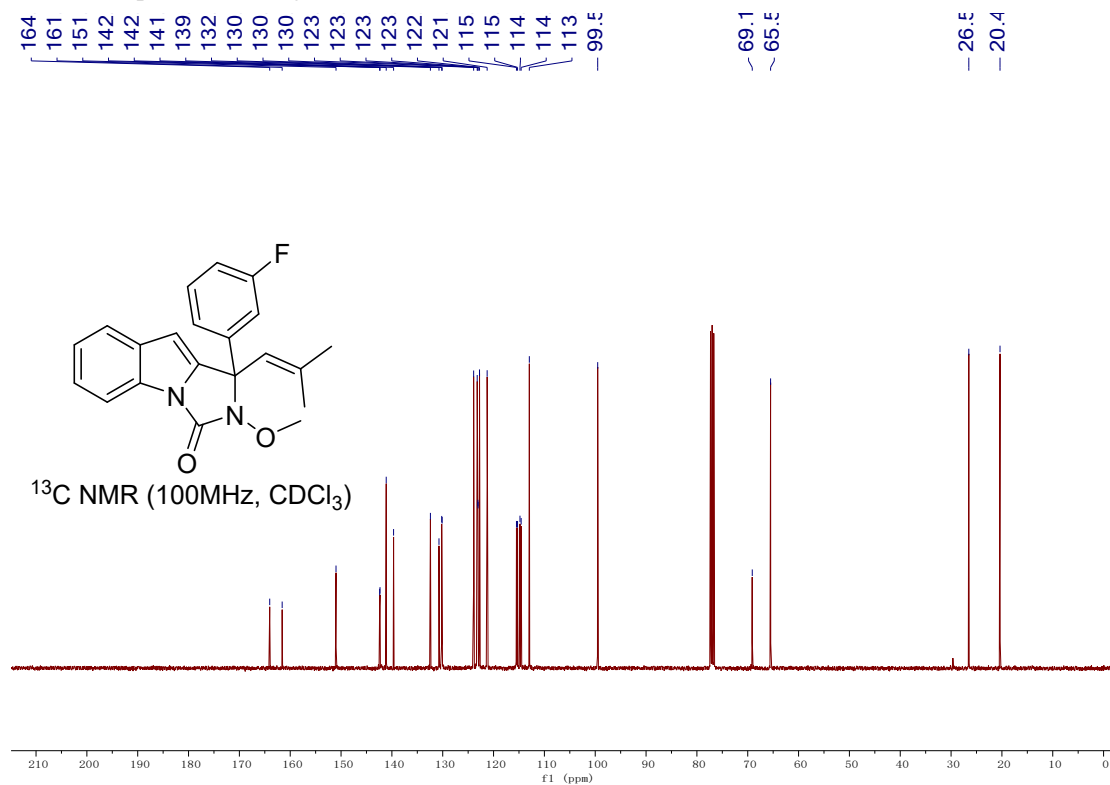



<sup>19</sup>F NMR spectrum of **3aj**

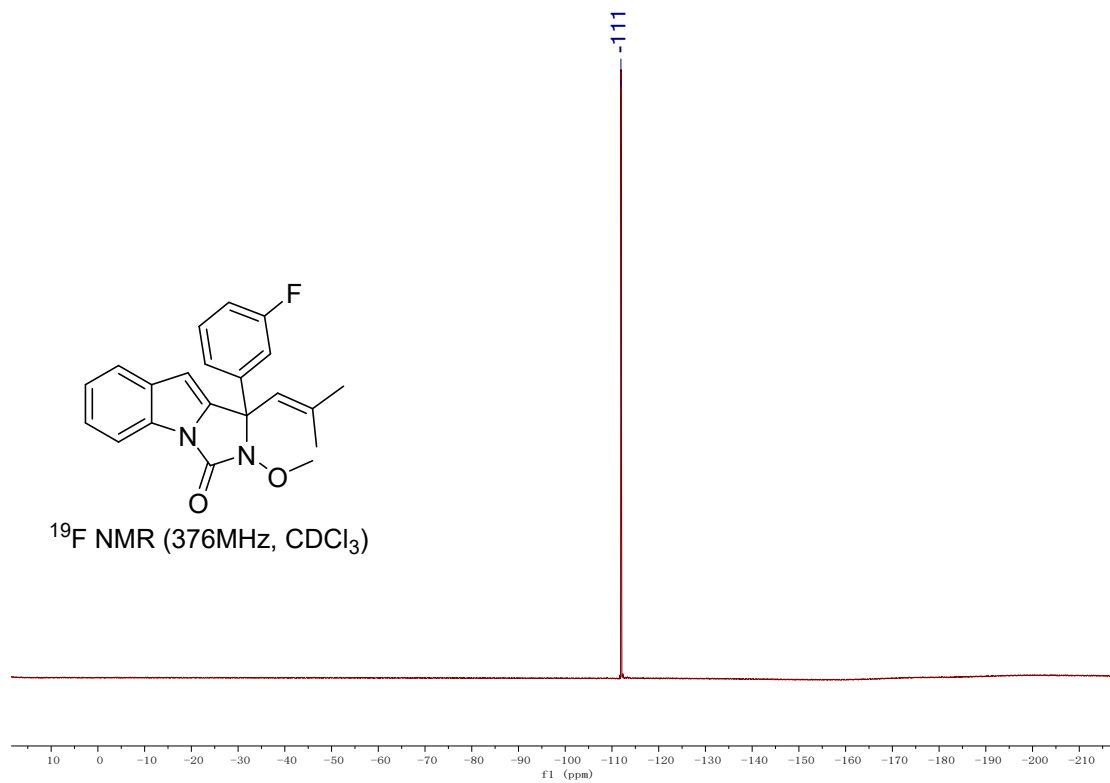

<sup>1</sup>H NMR spectrum of **3ak**

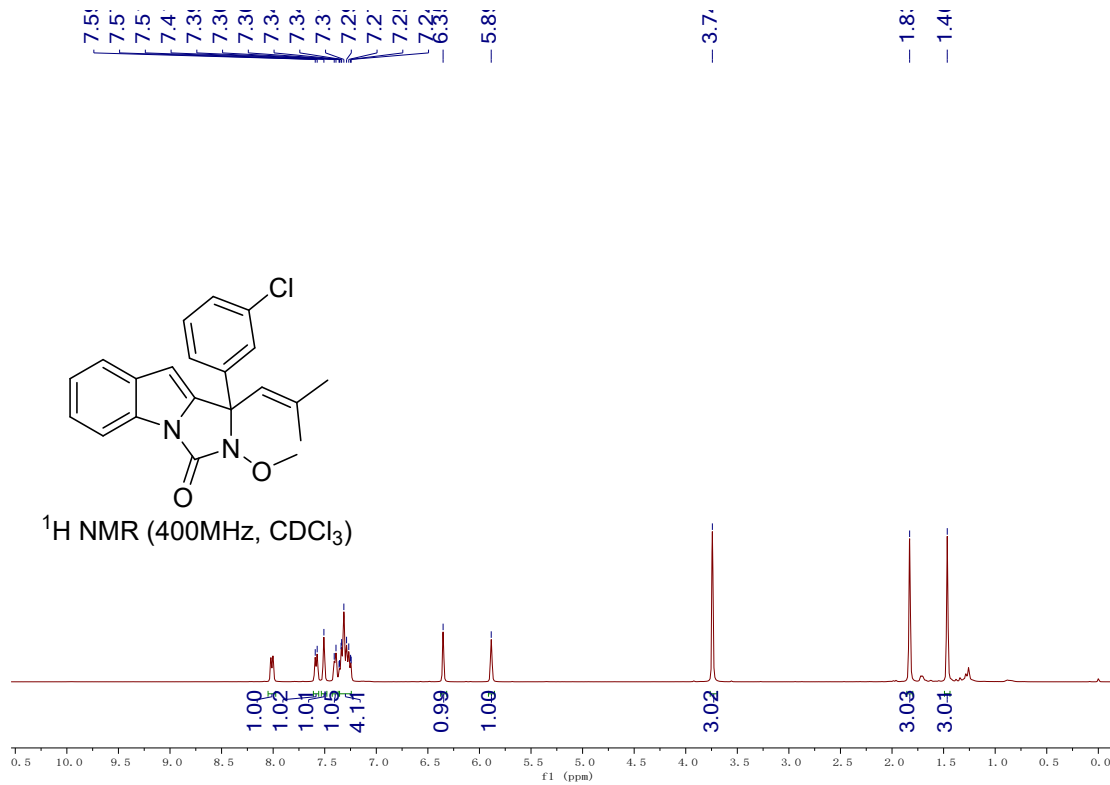

<sup>13</sup>C NMR spectrum of **3ak**

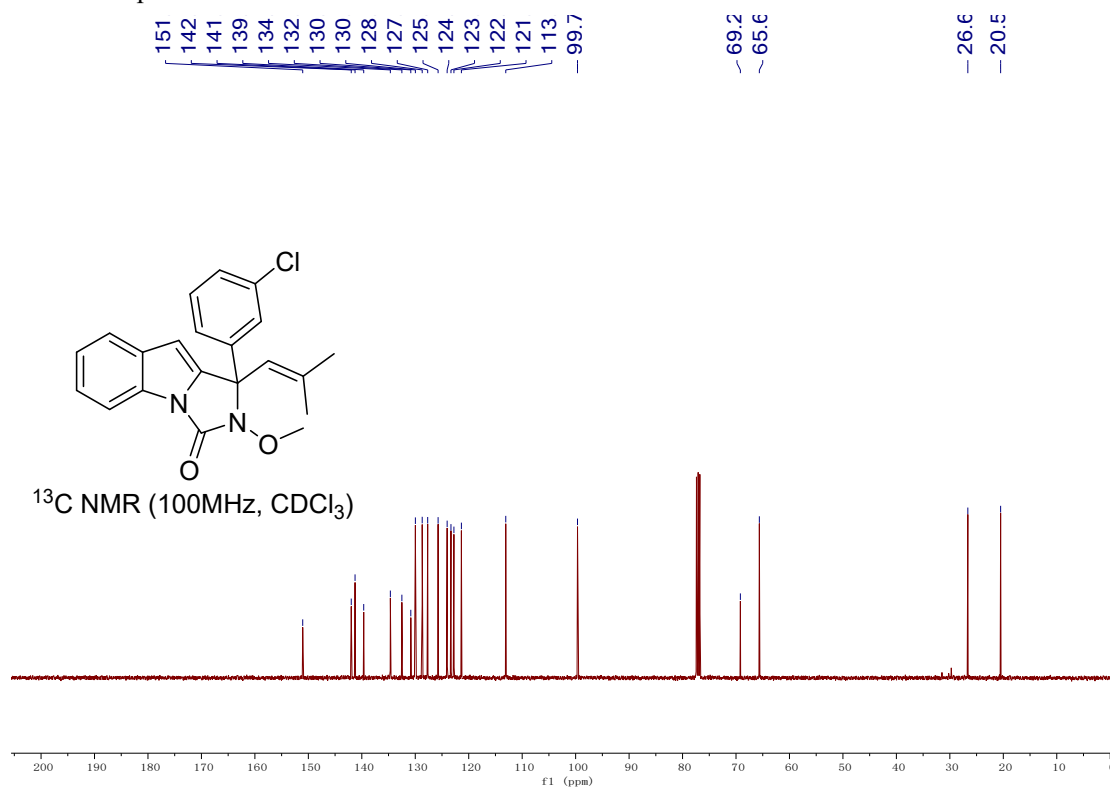

<sup>1</sup>H NMR spectrum of **3al**

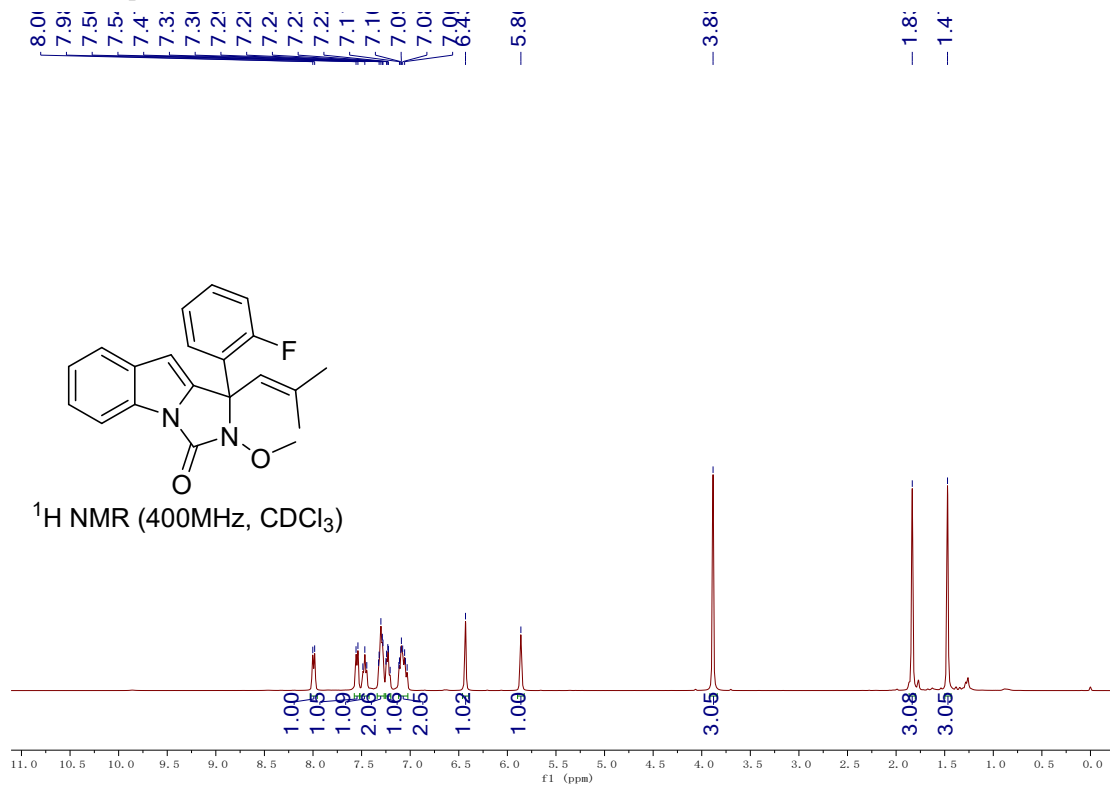

<sup>13</sup>C NMR spectrum of **3al**

162  
159  
150  
140  
139  
132  
130  
130  
130  
128  
128  
127  
127  
124  
124  
123  
123  
122  
121  
116  
116  
112  
99.2  
99.1  
67.1  
65.4

-26.7  
-19.7

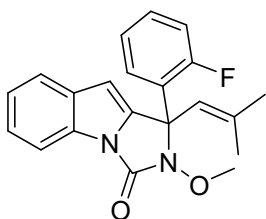

<sup>13</sup>C NMR (100MHz, CDCl<sub>3</sub>)

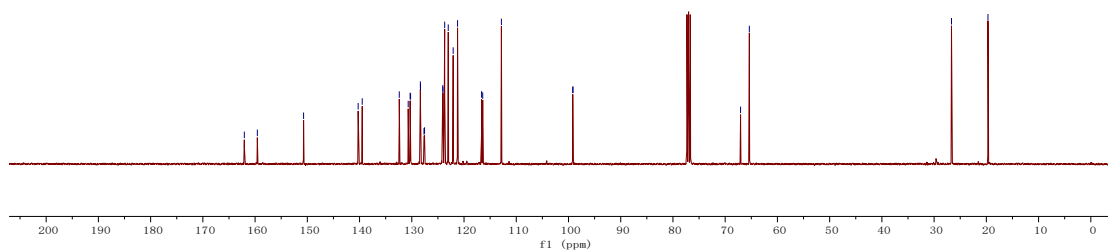

<sup>19</sup>F NMR spectrum of **3al**

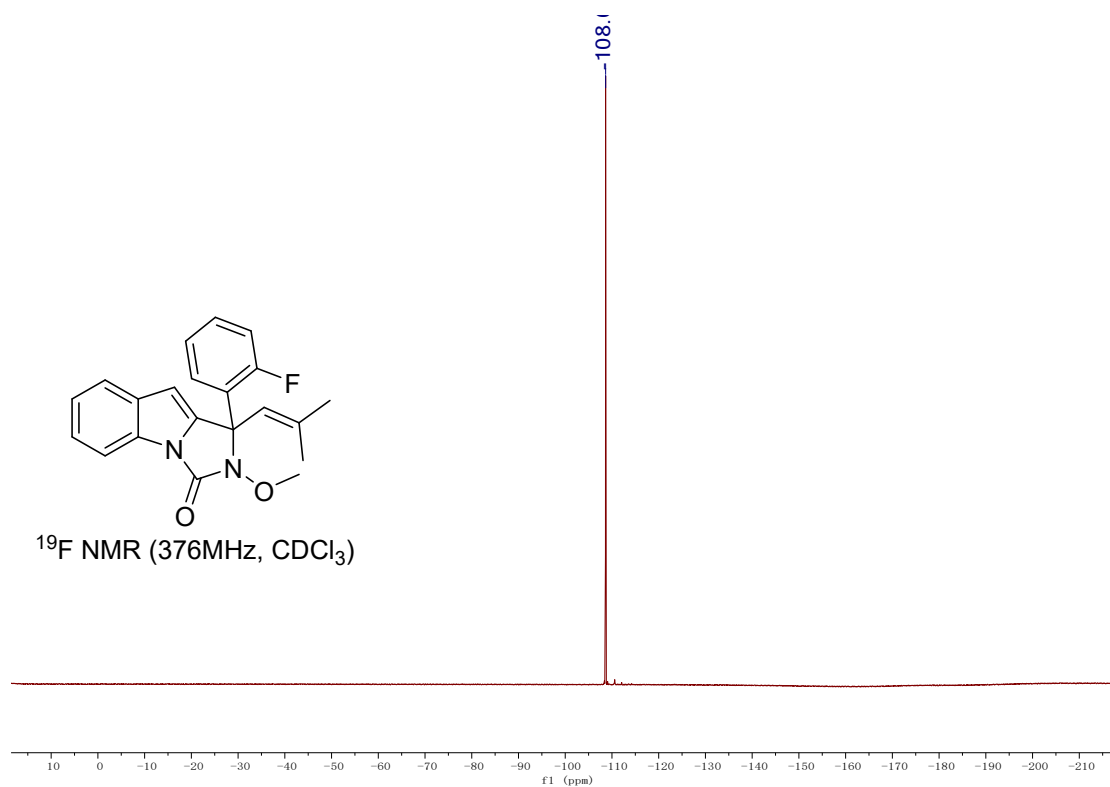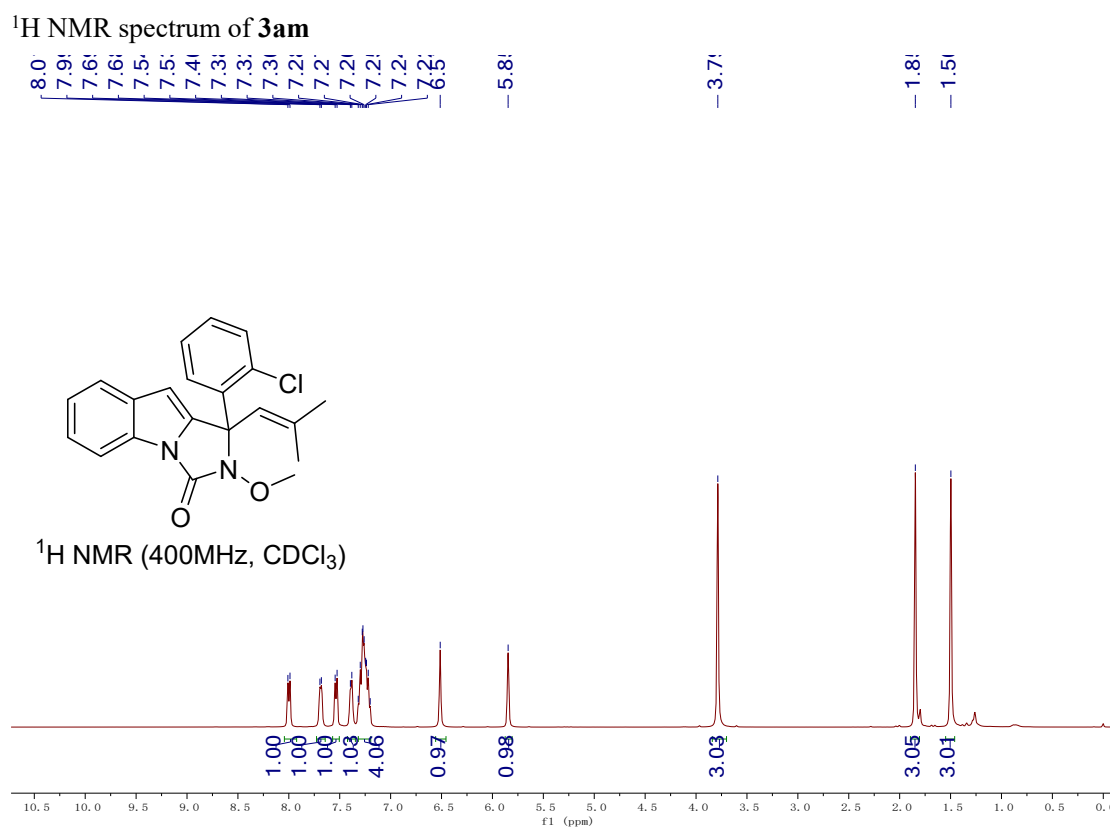

<sup>13</sup>C NMR spectrum of **3am**

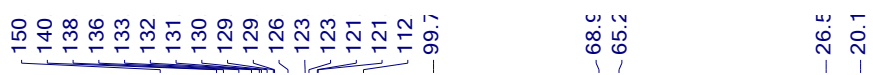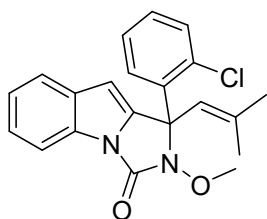

<sup>13</sup>C NMR (100MHz, CDCl<sub>3</sub>)

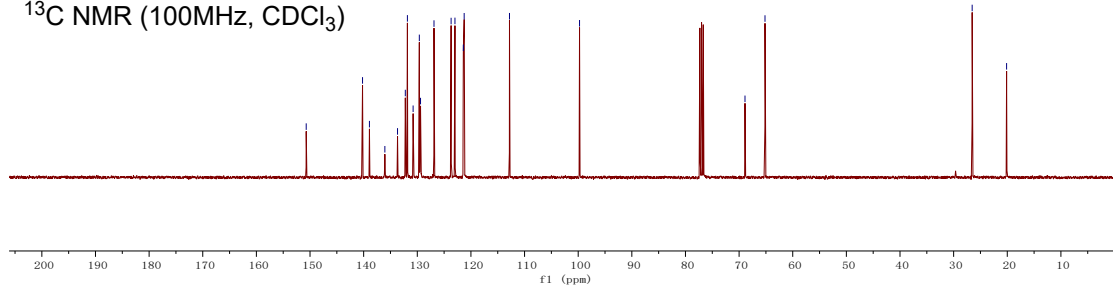

<sup>1</sup>H NMR spectrum of **3am**

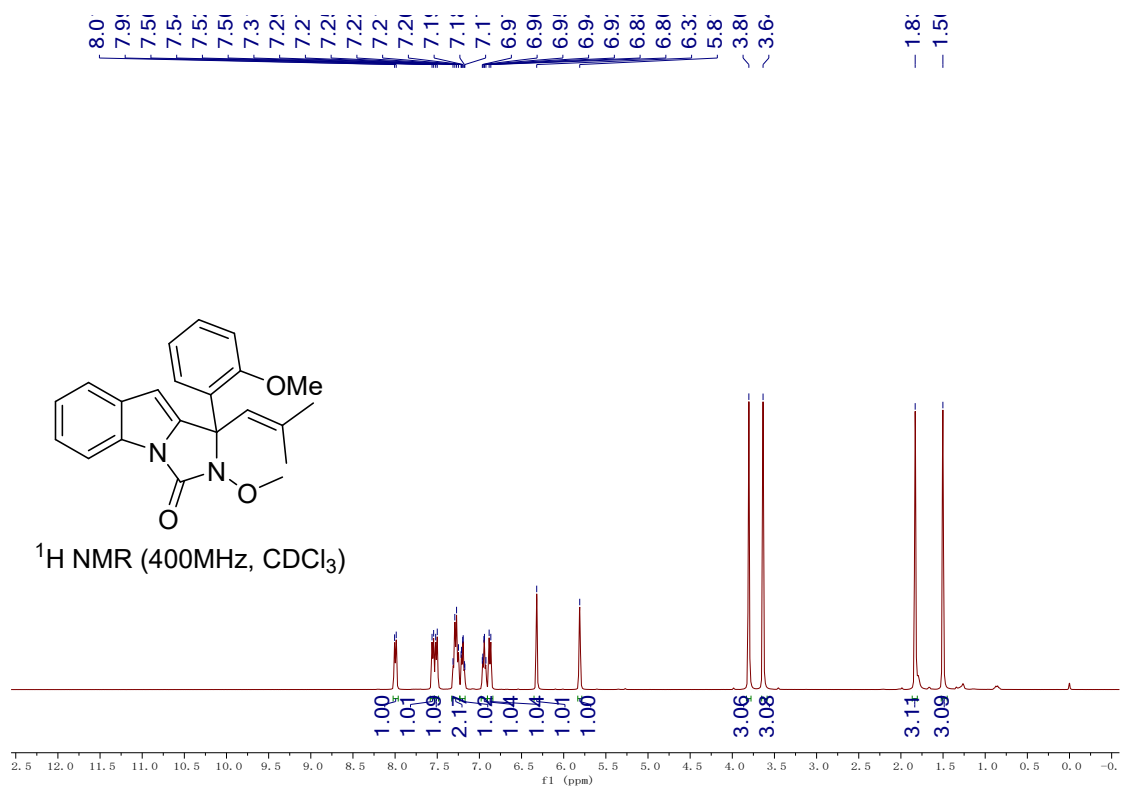

**<sup>13</sup>C NMR spectrum of **3an****

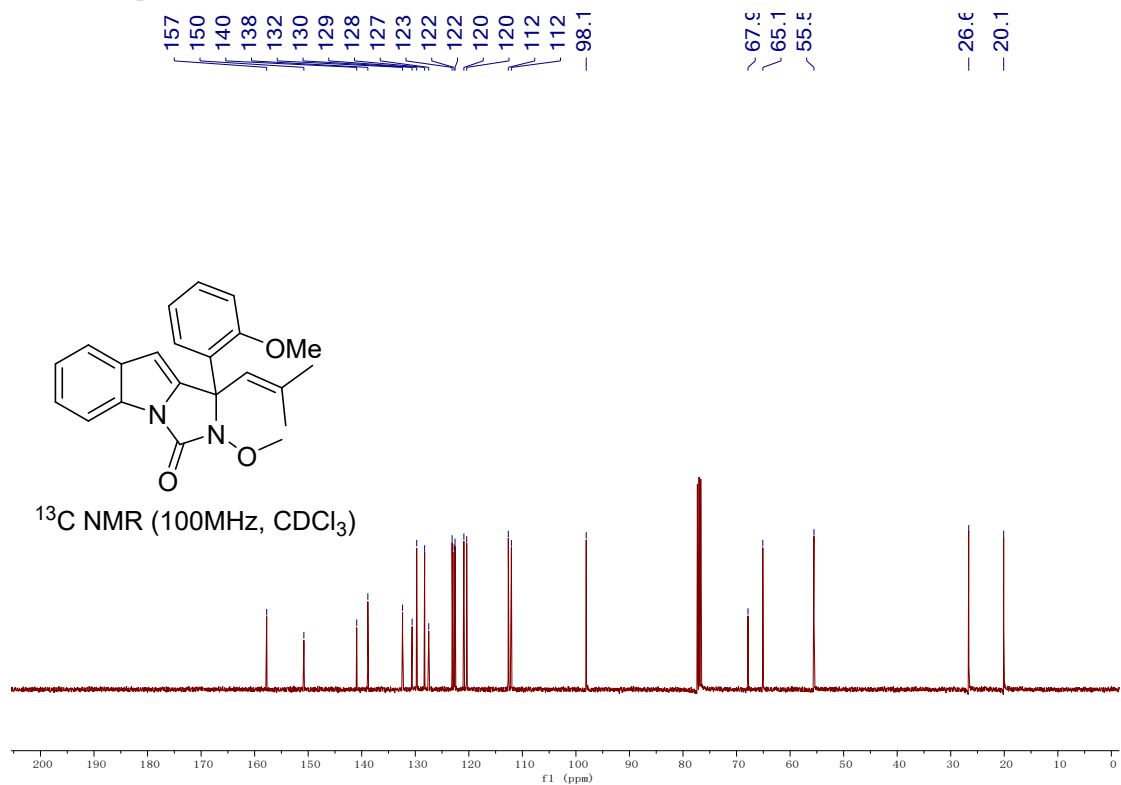

$^1\text{H}$  NMR spectrum of **3ao**

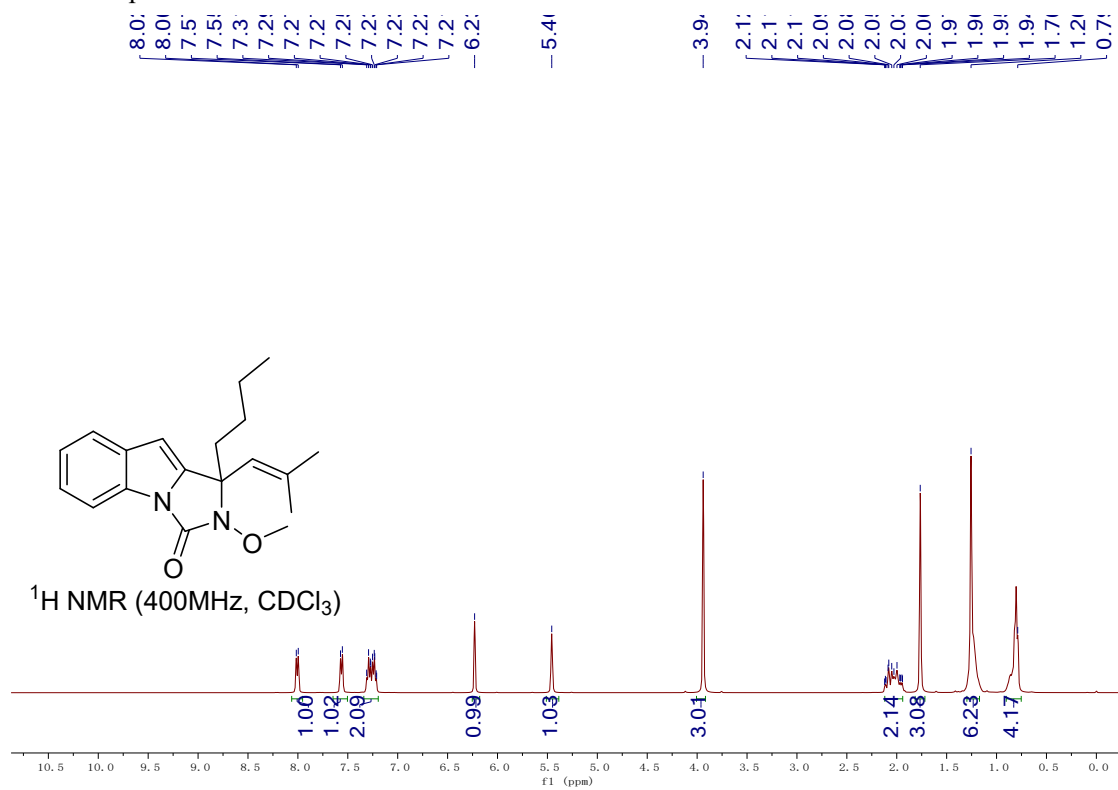

$^{13}\text{C}$  NMR spectrum of **3ao**

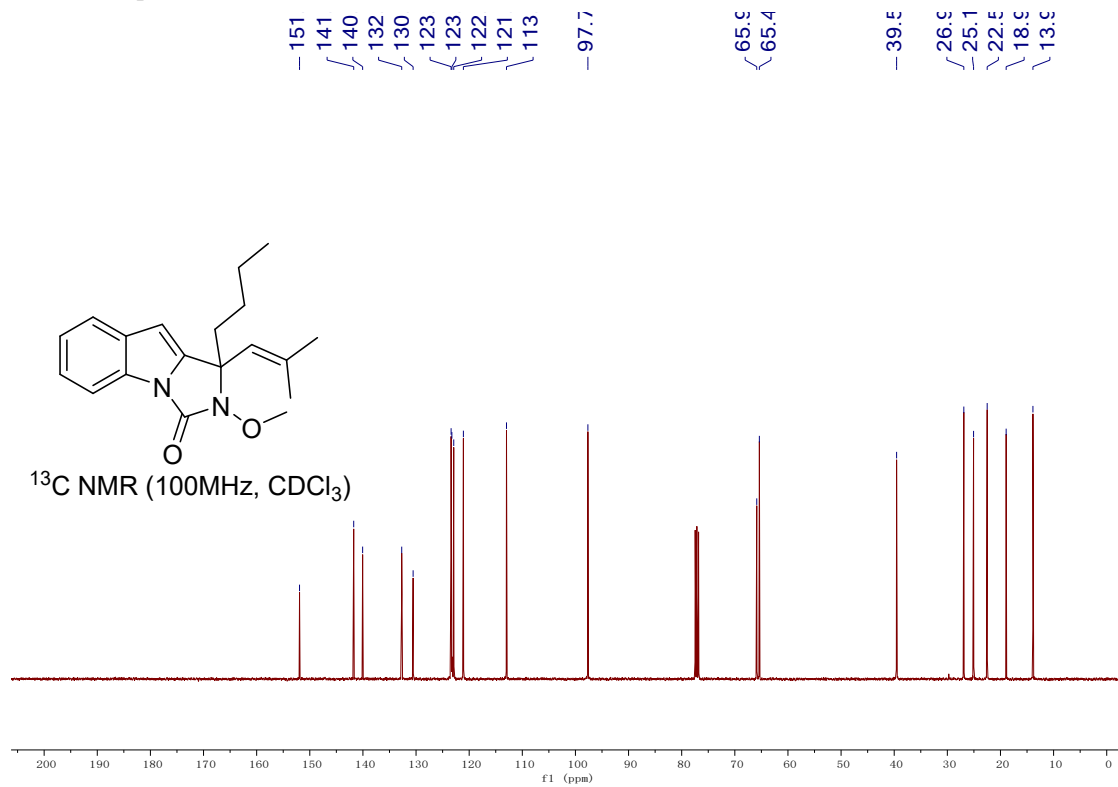

<sup>1</sup>H NMR spectrum of **3ap**

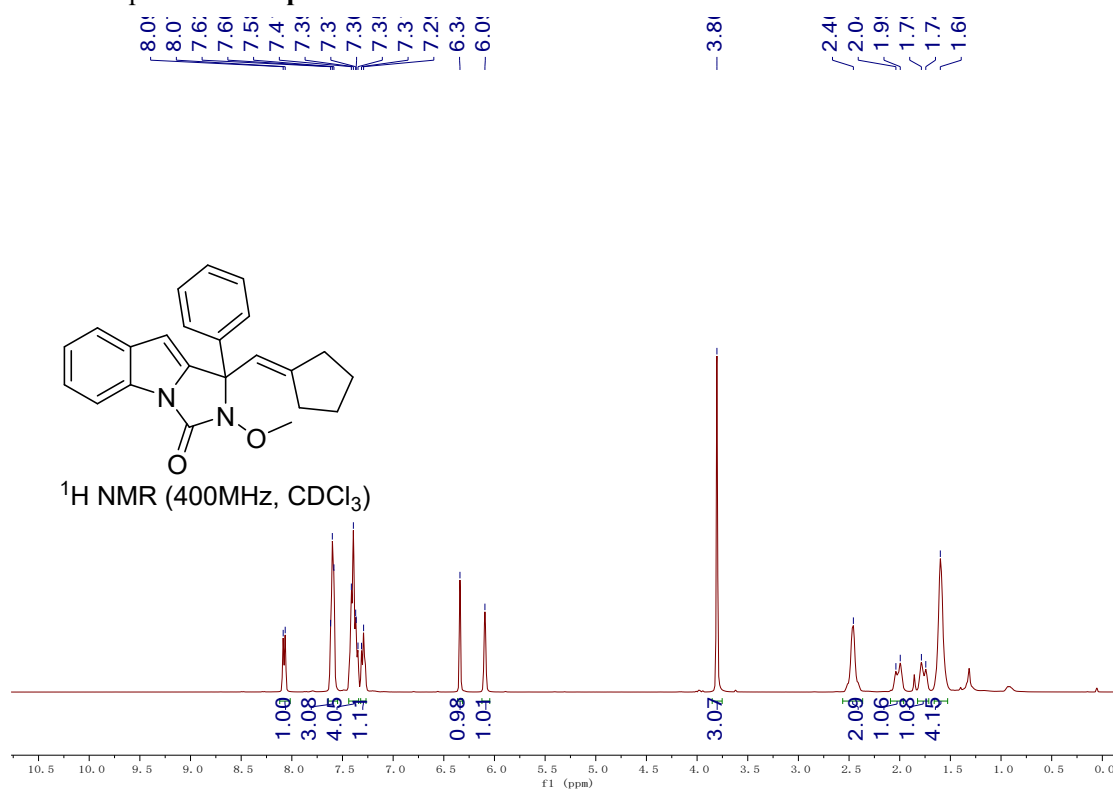

<sup>13</sup>C NMR spectrum of **3ap**

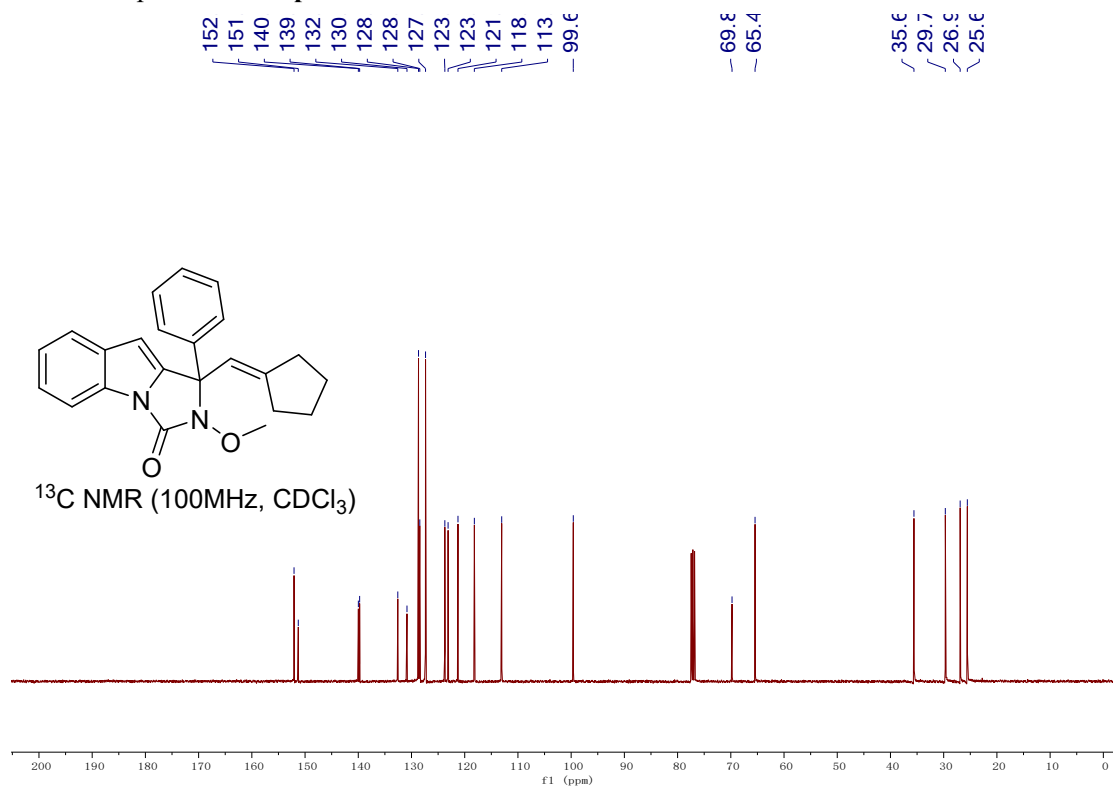



<sup>1</sup>H NMR spectrum of **3aq**

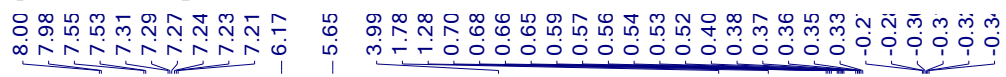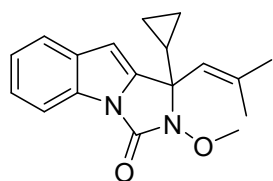

<sup>1</sup>H NMR (400MHz, CDCl<sub>3</sub>)

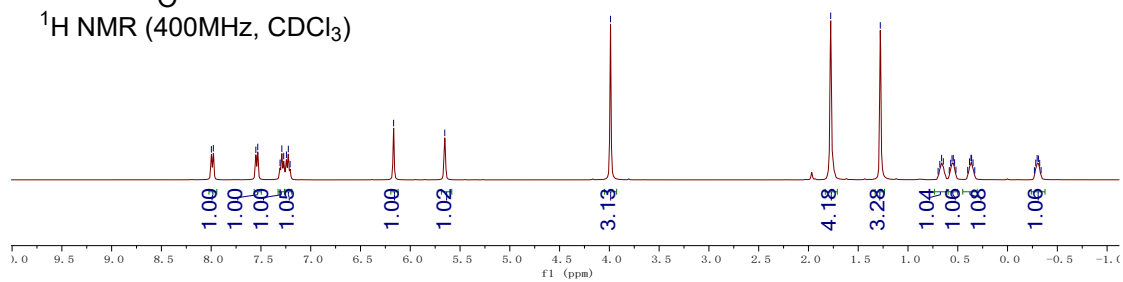

<sup>13</sup>C NMR spectrum of **3aq**

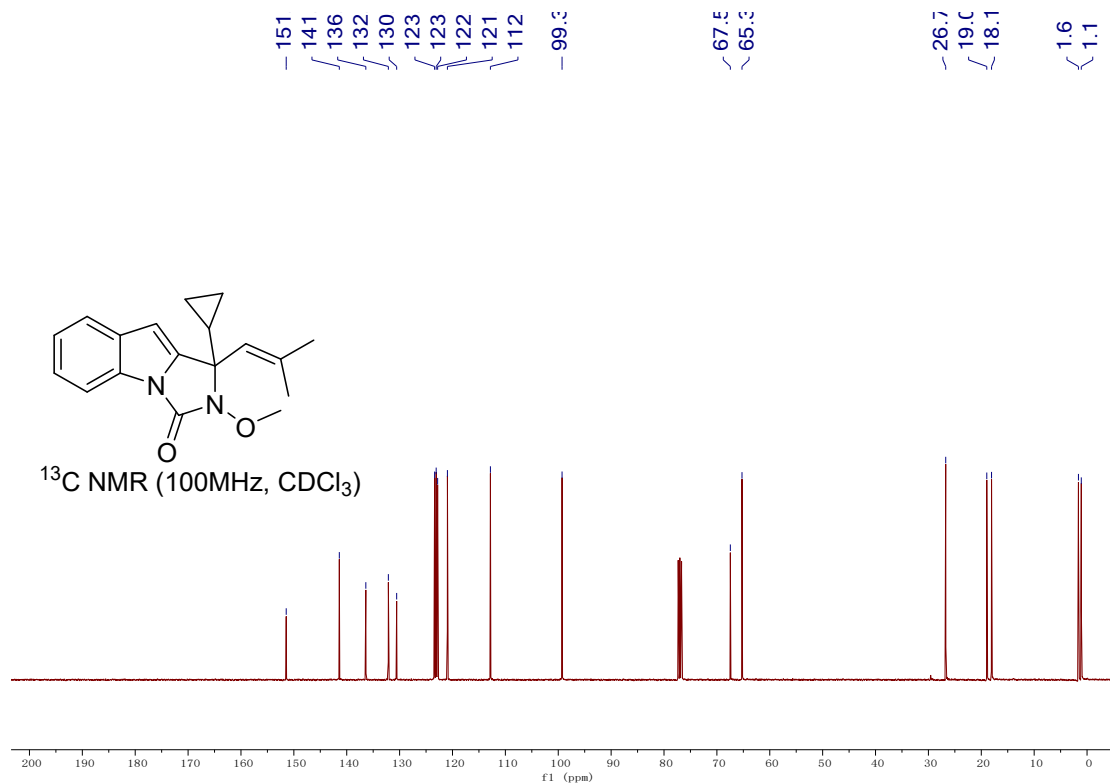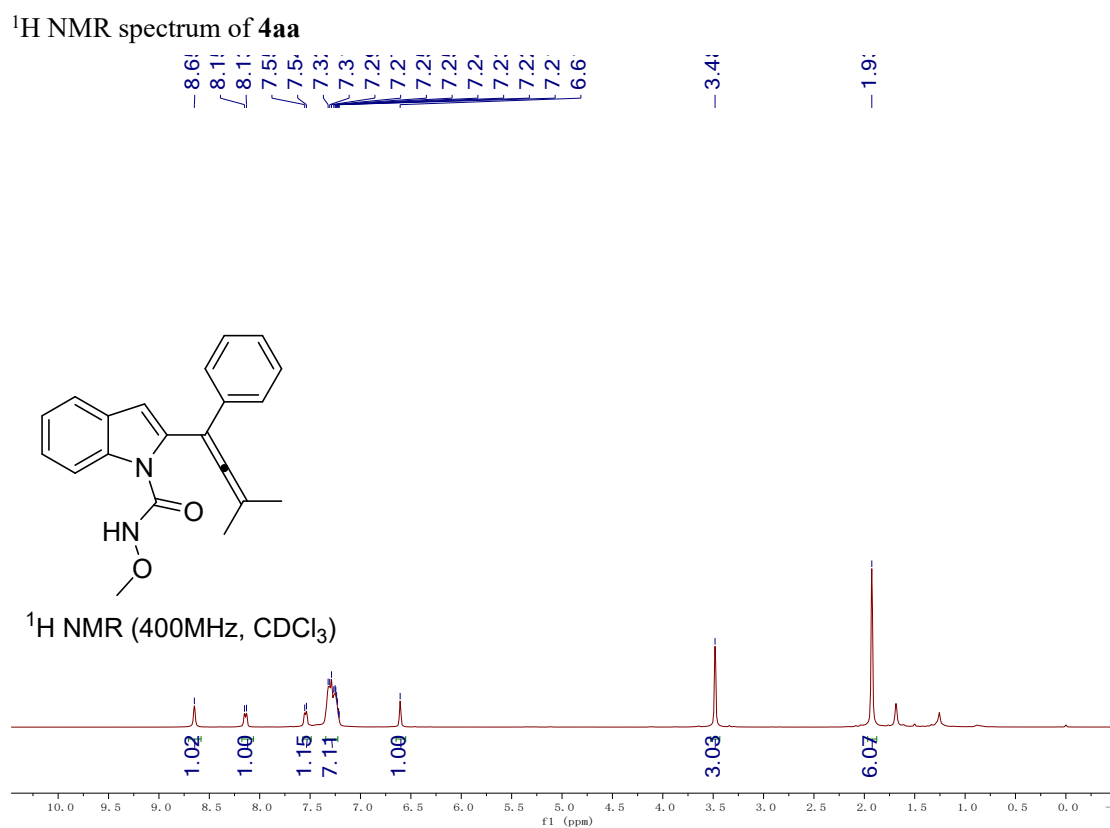

<sup>13</sup>C NMR spectrum of **4aa**

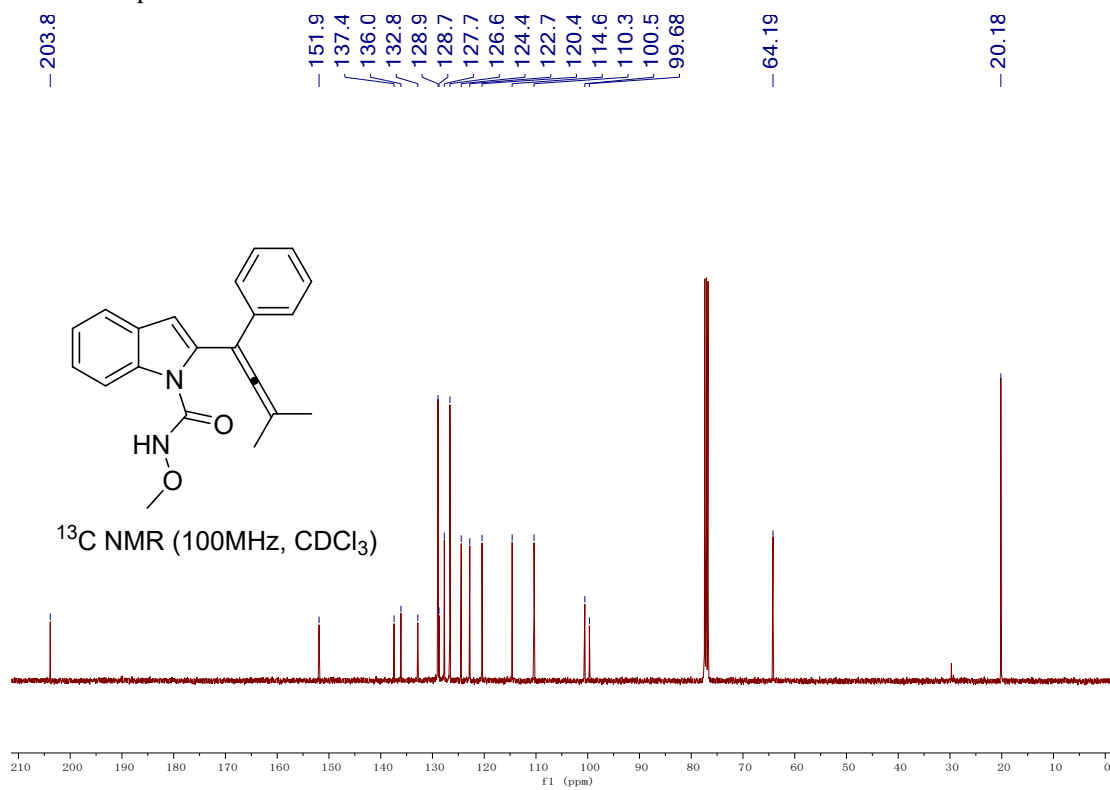

<sup>1</sup>H NMR spectrum of **4ba**

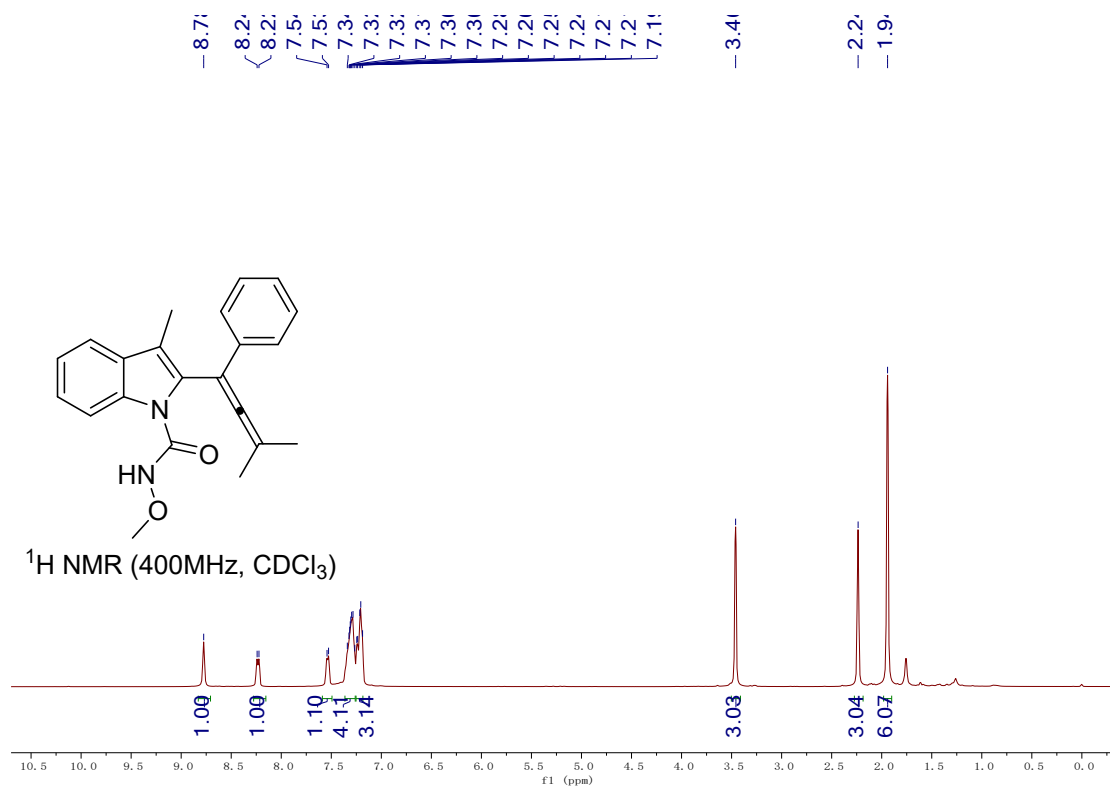

$^{13}\text{C}$  NMR spectrum of **4ba**

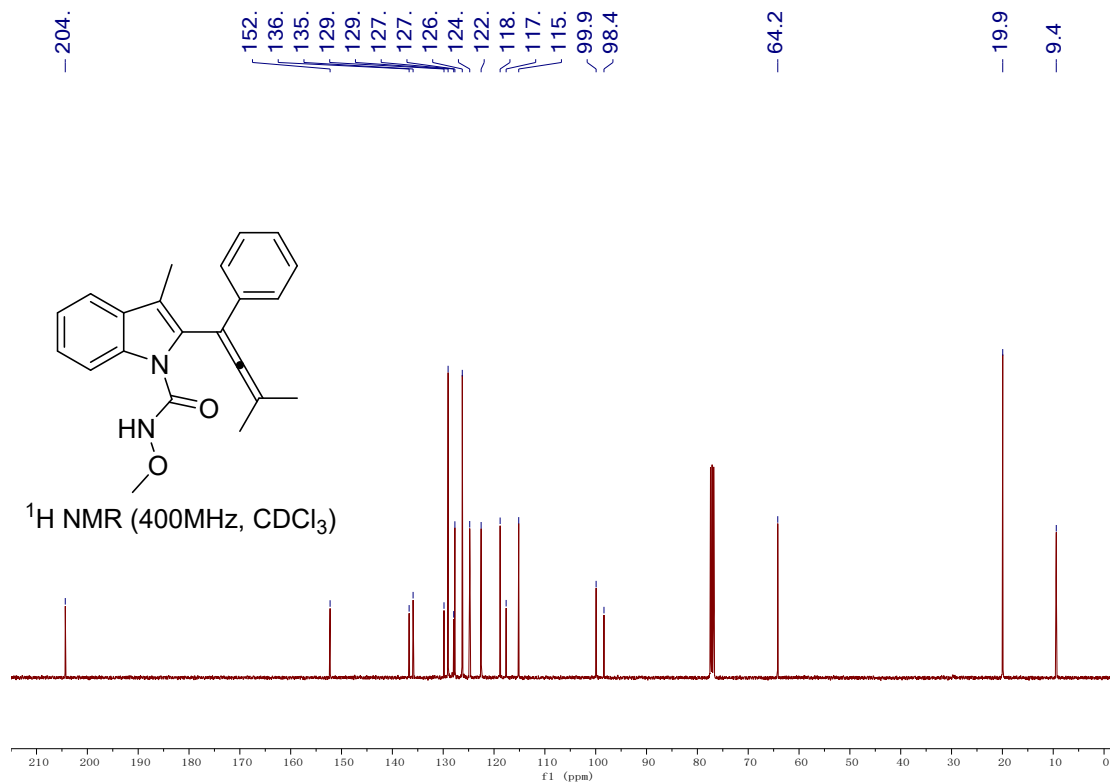

<sup>1</sup>H NMR spectrum of **5**

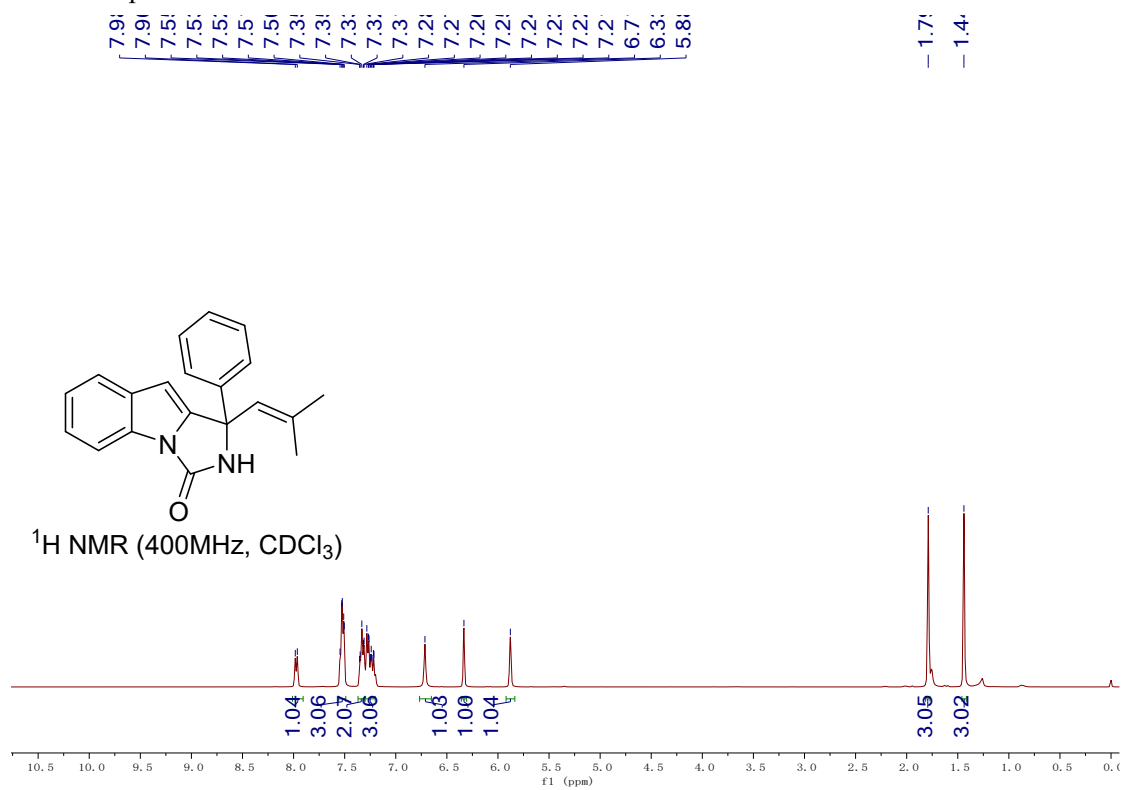

<sup>13</sup>C NMR spectrum of **5**

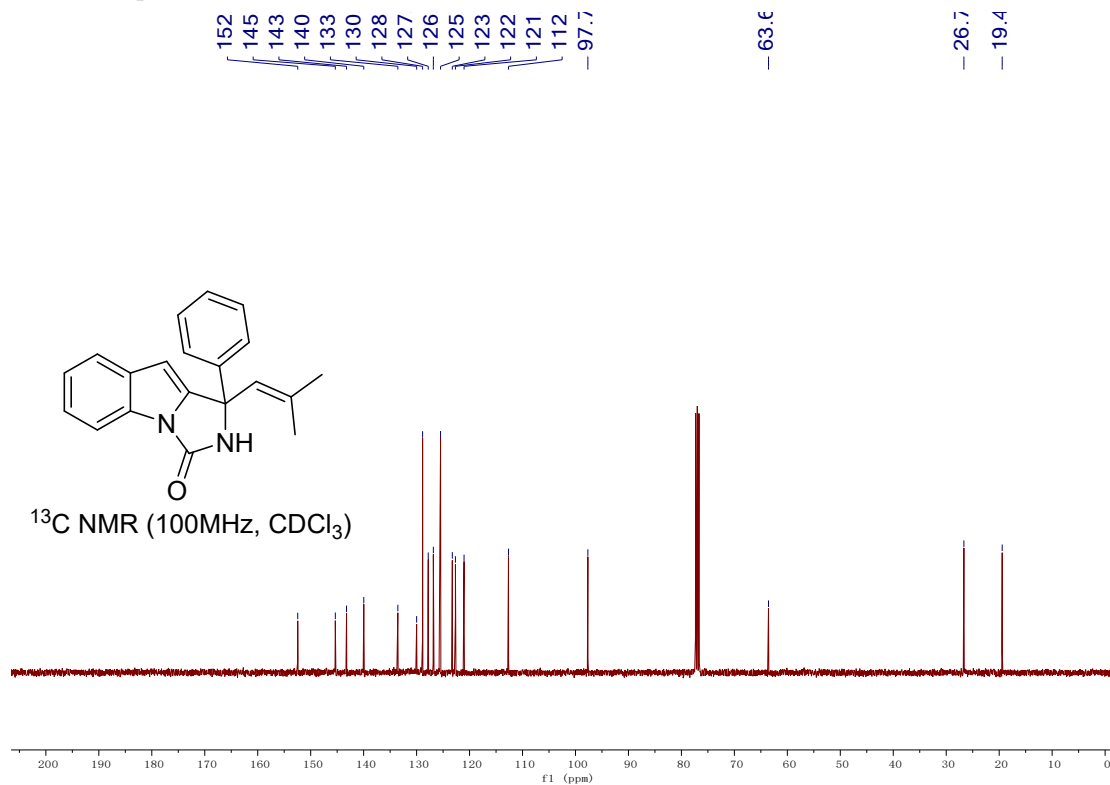

<sup>1</sup>H NMR spectrum of **6**

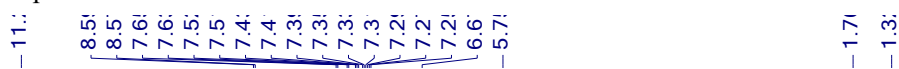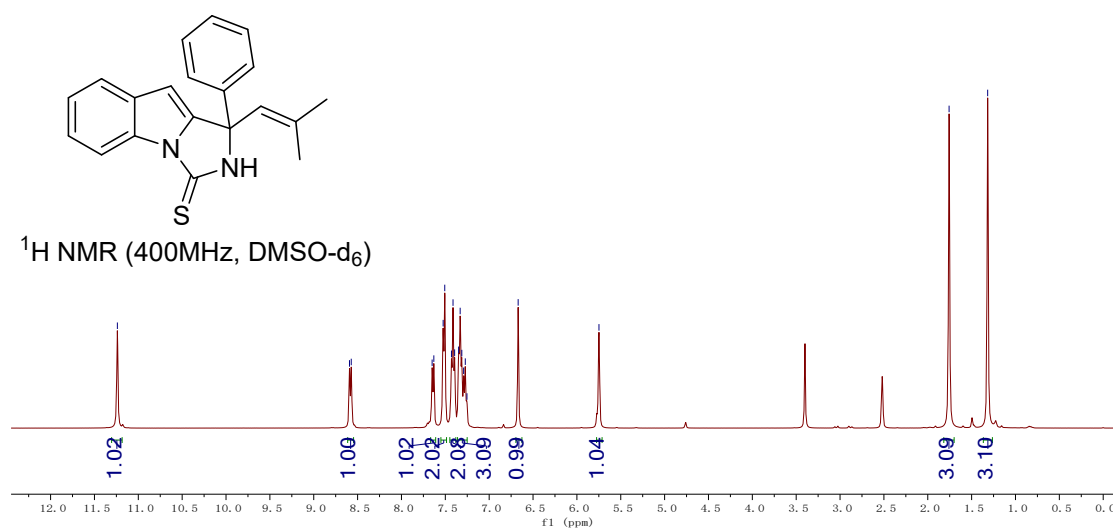

Supplement: d1cc04359e1.pdf [file d1cc04359e1.pdf]
